# Supplementary material for: Respiratory depression and analgesia by opioid drugs in freely behaving larval zebrafish
Source: eLife. 2021 Mar 15;10:e63407. doi: 10.7554/eLife.63407 (PMC8060028; doi:10.7554/eLife.63407)
Supplement: Figure 2—source data 1. [file elife-63407-fig2-data1.xlsx]

## Sheet: Figure2B-D
Animal #	Conditions	Groups	Rate	%baseline
3	Baseline	Control (embryo water)	65
5	Baseline	Control (embryo water)	72
13	Baseline	Control (embryo water)	60
18	Baseline	Control (embryo water)	65
19	Baseline	Control (embryo water)	51
20	Baseline	Control (embryo water)	42
21	Baseline	Control (embryo water)	33
22	Baseline	Control (embryo water)	33
23	Baseline	Control (embryo water)	48
24	Baseline	Control (embryo water)	68
26	Baseline	Control (embryo water)	90
27	Baseline	Control (embryo water)	91
28	Baseline	Control (embryo water)	61
30	Baseline	Control (embryo water)	85
31	Baseline	Control (embryo water)	75
32	Baseline	Control (embryo water)	76
34	Baseline	Control (embryo water)	78
35	Baseline	Control (embryo water)	67
38	Baseline	Control (embryo water)	112
39	Baseline	Control (embryo water)	82
40	Baseline	Control (embryo water)	82
42	Baseline	Control (embryo water)	71
3	Treatment	Control (embryo water)	34	52.3077
5	Treatment	Control (embryo water)	18	25
13	Treatment	Control (embryo water)	68	113.333
18	Treatment	Control (embryo water)	40	61.5385
24	Treatment	Control (embryo water)	87	127.941
26	Treatment	Control (embryo water)	72	80
27	Treatment	Control (embryo water)	98	107.692
28	Treatment	Control (embryo water)	103	168.852
30	Treatment	Control (embryo water)	97	114.118
31	Treatment	Control (embryo water)	70	93.3333
32	Treatment	Control (embryo water)	70	92.1053
34	Treatment	Control (embryo water)	72	92.3077
35	Treatment	Control (embryo water)	64	95.5224
38	Treatment	Control (embryo water)	85	75.8929
39	Treatment	Control (embryo water)	92	112.195
40	Treatment	Control (embryo water)	105	128.049
42	Treatment	Control (embryo water)	25	35.2113
45	Baseline	0.2uM Fentanyl	64
46	Baseline	0.2uM Fentanyl	72
48	Baseline	0.2uM Fentanyl	75
49	Baseline	0.2uM Fentanyl	67
53	Baseline	0.2uM Fentanyl	63
54	Baseline	0.2uM Fentanyl	92
45	Treatment	0.2uM Fentanyl	24	37.5
46	Treatment	0.2uM Fentanyl	56	77.7778
48	Treatment	0.2uM Fentanyl	20	26.6667
49	Treatment	0.2uM Fentanyl	39	58.209
53	Treatment	0.2uM Fentanyl	59	93.6508
54	Treatment	0.2uM Fentanyl	79	85.8696
59	Baseline	0.4uM Fentanyl	60
61	Baseline	0.4uM Fentanyl	65
63	Baseline	0.4uM Fentanyl	84
64	Baseline	0.4uM Fentanyl	86
59	Treatment	0.4uM Fentanyl	34	56.6667
61	Treatment	0.4uM Fentanyl	34	52.3077
63	Treatment	0.4uM Fentanyl	31	36.9048
64	Treatment	0.4uM Fentanyl	102	118.605
67	Baseline	1uM Fentanyl	60
70	Baseline	1uM Fentanyl	61
71	Baseline	1uM Fentanyl	71
72	Baseline	1uM Fentanyl	68
74	Baseline	1uM Fentanyl	80
76	Baseline	1uM Fentanyl	76
78	Baseline	1uM Fentanyl	73
79	Baseline	1uM Fentanyl	66
80	Baseline	1uM Fentanyl	117
83	Baseline	1uM Fentanyl	81
67	Treatment	1uM Fentanyl	24	40
70	Treatment	1uM Fentanyl	25	40.9836
71	Treatment	1uM Fentanyl	5	7.04225
72	Treatment	1uM Fentanyl	9	13.2353
74	Treatment	1uM Fentanyl	78	97.5
76	Treatment	1uM Fentanyl	7	9.21053
78	Treatment	1uM Fentanyl	38	52.0548
79	Treatment	1uM Fentanyl	39	59.0909
80	Treatment	1uM Fentanyl	55	47.0085
83	Treatment	1uM Fentanyl	8	9.87654
84	Baseline	3 uM Fentanyl	70
87	Baseline	3 uM Fentanyl	89
88	Baseline	3 uM Fentanyl	95
91	Baseline	3 uM Fentanyl	63
92	Baseline	3 uM Fentanyl	92
93	Baseline	3 uM Fentanyl	115
94	Baseline	3 uM Fentanyl	63
95	Baseline	3 uM Fentanyl	105
97	Baseline	3 uM Fentanyl	84
84	Treatment	3 uM Fentanyl	8	11.4286
87	Treatment	3 uM Fentanyl	6	6.74157
88	Treatment	3 uM Fentanyl	82	86.3158
91	Treatment	3 uM Fentanyl	95	150.794
92	Treatment	3 uM Fentanyl	12	13.0435
93	Treatment	3 uM Fentanyl	6	5.21739
94	Treatment	3 uM Fentanyl	36	57.1429
95	Treatment	3 uM Fentanyl	13	12.381
97	Treatment	3 uM Fentanyl	59	70.2381

## Sheet: Figure2C-E
Animal #	Conditions	Groups	Time (min)	Rate	%baseline
1	Baseline	Control (embryo water)	0	36	100
1	Treatment	Control (embryo water)	2	86	238.889
1	Treatment	Control (embryo water)	4	68	188.889
1	Treatment	Control (embryo water)	6	42	116.667
1	Treatment	Control (embryo water)	8	48	133.333
1	Treatment	Control (embryo water)	10	62	172.222
1	Treatment	Control (embryo water)	12	50	138.889
1	Treatment	Control (embryo water)	14	54	150
1	Treatment	Control (embryo water)	16	58	161.111
1	Treatment	Control (embryo water)	18	38	105.556
1	Treatment	Control (embryo water)	20	76	211.111
1	Treatment	Control (embryo water)	22	60	166.667
1	Treatment	Control (embryo water)	24	30	83.3333
1	Treatment	Control (embryo water)	26	2	5.55556
1	Treatment	Control (embryo water)	28	2	5.55556
1	Treatment	Control (embryo water)	30	16	44.4444
2	Baseline	Control (embryo water)	0	120	100
2	Treatment	Control (embryo water)	2	140	116.667
2	Treatment	Control (embryo water)	4	148	123.333
2	Treatment	Control (embryo water)	6	140	116.667
2	Treatment	Control (embryo water)	8	134	111.667
2	Treatment	Control (embryo water)	10	138	115
2	Treatment	Control (embryo water)	12	152	126.667
2	Treatment	Control (embryo water)	14	108	90
2	Treatment	Control (embryo water)	16	132	110
2	Treatment	Control (embryo water)	18	88	73.3333
2	Treatment	Control (embryo water)	20	92	76.6667
2	Treatment	Control (embryo water)	22	50	41.6667
2	Treatment	Control (embryo water)	24	38	31.6667
2	Treatment	Control (embryo water)	26	68	56.6667
2	Treatment	Control (embryo water)	28	86	71.6667
2	Treatment	Control (embryo water)	30	84	70
3	Baseline	Control (embryo water)	0	78	100
3	Treatment	Control (embryo water)	2	112	143.59
3	Treatment	Control (embryo water)	4	102	130.769
3	Treatment	Control (embryo water)	6	122	156.41
3	Treatment	Control (embryo water)	8	94	120.513
3	Treatment	Control (embryo water)	10	154	197.436
3	Treatment	Control (embryo water)	12	92	117.949
3	Treatment	Control (embryo water)	14	158	202.564
3	Treatment	Control (embryo water)	16	148	189.744
3	Treatment	Control (embryo water)	18	160	205.128
3	Treatment	Control (embryo water)	20	92	117.949
3	Treatment	Control (embryo water)	22	86	110.256
3	Treatment	Control (embryo water)	24	94	120.513
3	Treatment	Control (embryo water)	26	94	120.513
3	Treatment	Control (embryo water)	28	98	125.641
3	Treatment	Control (embryo water)	30	98	125.641
4	Baseline	1uM Fentanyl	0	138	100
4	Treatment	1uM Fentanyl	2	84	60.8696
4	Treatment	1uM Fentanyl	4	94	68.1159
4	Treatment	1uM Fentanyl	6	100	72.4638
4	Treatment	1uM Fentanyl	8	150	108.696
4	Treatment	1uM Fentanyl	10	124	89.8551
4	Treatment	1uM Fentanyl	12	142	102.899
4	Treatment	1uM Fentanyl	14	142	102.899
4	Treatment	1uM Fentanyl	16	120	86.9565
4	Treatment	1uM Fentanyl	18	172	124.638
4	Treatment	1uM Fentanyl	20	84	60.8696
4	Treatment	1uM Fentanyl	22	68	49.2754
4	Treatment	1uM Fentanyl	24	64	46.3768
4	Treatment	1uM Fentanyl	26	44	31.8841
4	Treatment	1uM Fentanyl	28	82	59.4203
4	Treatment	1uM Fentanyl	30	86	62.3188
5	Baseline	1uM Fentanyl	0	78	100
5	Treatment	1uM Fentanyl	2	54	69.2308
5	Treatment	1uM Fentanyl	4	34	43.5897
5	Treatment	1uM Fentanyl	6	44	56.4103
5	Treatment	1uM Fentanyl	8	28	35.8974
5	Treatment	1uM Fentanyl	10	34	43.5897
5	Treatment	1uM Fentanyl	12	34	43.5897
5	Treatment	1uM Fentanyl	14	40	51.2821
5	Treatment	1uM Fentanyl	16	22	28.2051
5	Treatment	1uM Fentanyl	18	38	48.7179
5	Treatment	1uM Fentanyl	20	44	56.4103
5	Treatment	1uM Fentanyl	22	52	66.6667
5	Treatment	1uM Fentanyl	24	46	58.9744
5	Treatment	1uM Fentanyl	26	58	74.359
5	Treatment	1uM Fentanyl	28	54	69.2308
5	Treatment	1uM Fentanyl	30	32	41.0256
6	Baseline	1uM Fentanyl	0	144	100
6	Treatment	1uM Fentanyl	2	6	4.16667
6	Treatment	1uM Fentanyl	4	12	8.33333
6	Treatment	1uM Fentanyl	6	8	5.55556
6	Treatment	1uM Fentanyl	8	6	4.16667
6	Treatment	1uM Fentanyl	10	2	1.38889
6	Treatment	1uM Fentanyl	12	0	0
6	Treatment	1uM Fentanyl	14	8	5.55556
6	Treatment	1uM Fentanyl	16	12	8.33333
6	Treatment	1uM Fentanyl	18	6	4.16667
6	Treatment	1uM Fentanyl	20	14	9.72222
6	Treatment	1uM Fentanyl	22	12	8.33333
6	Treatment	1uM Fentanyl	24	8	5.55556
6	Treatment	1uM Fentanyl	26	10	6.94444
6	Treatment	1uM Fentanyl	28	20	13.8889
6	Treatment	1uM Fentanyl	30	28	19.4444
7	Baseline	1uM Fentanyl	0	62	100
7	Treatment	1uM Fentanyl	2	6	9.67742
7	Treatment	1uM Fentanyl	4	32	51.6129
7	Treatment	1uM Fentanyl	6	10	16.129
7	Treatment	1uM Fentanyl	8	8	12.9032
7	Treatment	1uM Fentanyl	10	4	6.45161
7	Treatment	1uM Fentanyl	12	8	12.9032
7	Treatment	1uM Fentanyl	14	58	93.5484
7	Treatment	1uM Fentanyl	16	68	109.677
7	Treatment	1uM Fentanyl	18	72	116.129
7	Treatment	1uM Fentanyl	20	34	54.8387
7	Treatment	1uM Fentanyl	22	18	29.0323
7	Treatment	1uM Fentanyl	24	6	9.67742
7	Treatment	1uM Fentanyl	26	4	6.45161
7	Treatment	1uM Fentanyl	28	2	3.22581
7	Treatment	1uM Fentanyl	30	4	6.45161
8	Baseline	1uM Fentanyl	0	162	100
8	Treatment	1uM Fentanyl	2	82	50.6173
8	Treatment	1uM Fentanyl	4	106	65.4321
8	Treatment	1uM Fentanyl	6	84	51.8519
8	Treatment	1uM Fentanyl	8	70	43.2099
8	Treatment	1uM Fentanyl	10	84	51.8519
8	Treatment	1uM Fentanyl	12	110	67.9012
8	Treatment	1uM Fentanyl	14	76	46.9136
8	Treatment	1uM Fentanyl	16	38	23.4568
8	Treatment	1uM Fentanyl	18	64	39.5062
8	Treatment	1uM Fentanyl	20	48	29.6296
8	Treatment	1uM Fentanyl	22	26	16.0494
8	Treatment	1uM Fentanyl	24	42	25.9259
8	Treatment	1uM Fentanyl	26	56	34.5679
8	Treatment	1uM Fentanyl	28	60	37.037
8	Treatment	1uM Fentanyl	30	22	13.5802
9	Baseline	1uM Fentanyl	0	40	100
9	Treatment	1uM Fentanyl	2	28	70
9	Treatment	1uM Fentanyl	4	16	40
9	Treatment	1uM Fentanyl	6	18	45
9	Treatment	1uM Fentanyl	8	14	35
9	Treatment	1uM Fentanyl	10	18	45
9	Treatment	1uM Fentanyl	12	4	10
9	Treatment	1uM Fentanyl	14	18	45
9	Treatment	1uM Fentanyl	16	40	100
9	Treatment	1uM Fentanyl	18	18	45
9	Treatment	1uM Fentanyl	20	10	25
9	Treatment	1uM Fentanyl	22	14	35
9	Treatment	1uM Fentanyl	24	18	45
9	Treatment	1uM Fentanyl	26	18	45
9	Treatment	1uM Fentanyl	28	16	40
9	Treatment	1uM Fentanyl	30	22	55
10	Baseline	1uM Fentanyl	0	26	100
10	Treatment	1uM Fentanyl	2	34	130.769
10	Treatment	1uM Fentanyl	4	96	369.231
10	Treatment	1uM Fentanyl	6	98	376.923
10	Treatment	1uM Fentanyl	8	118	453.846
10	Treatment	1uM Fentanyl	10	140	538.462
10	Treatment	1uM Fentanyl	12	120	461.538
10	Treatment	1uM Fentanyl	14	122	469.231
10	Treatment	1uM Fentanyl	16	104	400
10	Treatment	1uM Fentanyl	18	114	438.462
10	Treatment	1uM Fentanyl	20	60	230.769
10	Treatment	1uM Fentanyl	22	38	146.154
10	Treatment	1uM Fentanyl	24	36	138.462
10	Treatment	1uM Fentanyl	26	62	238.462
10	Treatment	1uM Fentanyl	28	28	107.692
10	Treatment	1uM Fentanyl	30	48	184.615
11	Baseline	1uM Fentanyl	0	84	100
11	Treatment	1uM Fentanyl	2	104	123.81
11	Treatment	1uM Fentanyl	4	134	159.524
11	Treatment	1uM Fentanyl	6	144	171.429
11	Treatment	1uM Fentanyl	8	98	116.667
11	Treatment	1uM Fentanyl	10	74	88.0952
11	Treatment	1uM Fentanyl	12	82	97.619
11	Treatment	1uM Fentanyl	14	100	119.048
11	Treatment	1uM Fentanyl	16	102	121.429
11	Treatment	1uM Fentanyl	18	38	45.2381
11	Treatment	1uM Fentanyl	20	24	28.5714
11	Treatment	1uM Fentanyl	22	22	26.1905
11	Treatment	1uM Fentanyl	24	52	61.9048
11	Treatment	1uM Fentanyl	26	86	102.381
11	Treatment	1uM Fentanyl	28	28	33.3333
11	Treatment	1uM Fentanyl	30	40	47.619
