# Supplementary material for: Respiratory depression and analgesia by opioid drugs in freely behaving larval zebrafish
Source: eLife. 2021 Mar 15;10:e63407. doi: 10.7554/eLife.63407 (PMC8060028; doi:10.7554/eLife.63407)
Supplement: Figure 3—source data 1. [file elife-63407-fig3-data1.xlsx]

## Sheet: Figure3B
Animal #	Conditions	Groups	Grp	Rate	%baseline
8	Baseline	Control (embryo water)	Ctrl	65
13	Baseline	Control (embryo water)	Ctrl	74
14	Baseline	Control (embryo water)	Ctrl	69
15	Baseline	Control (embryo water)	Ctrl	90
16	Baseline	Control (embryo water)	Ctrl	74
17	Baseline	Control (embryo water)	Ctrl	68
19	Baseline	Control (embryo water)	Ctrl	90
20	Baseline	Control (embryo water)	Ctrl	91
21	Baseline	Control (embryo water)	Ctrl	61
24	Baseline	Control (embryo water)	Ctrl	71
8	Treatment	Control (embryo water)	Ctrl	40	61.5385
13	Treatment	Control (embryo water)	Ctrl	68	91.8919
14	Treatment	Control (embryo water)	Ctrl	119	172.464
15	Treatment	Control (embryo water)	Ctrl	119	132.222
16	Treatment	Control (embryo water)	Ctrl	119	160.811
17	Treatment	Control (embryo water)	Ctrl	87	127.941
19	Treatment	Control (embryo water)	Ctrl	72	80
20	Treatment	Control (embryo water)	Ctrl	98	107.692
21	Treatment	Control (embryo water)	Ctrl	103	168.852
24	Treatment	Control (embryo water)	Ctrl	25	35.2113
28	Baseline	1uM Fentanyl	Fent	61
29	Baseline	1uM Fentanyl	Fent	71
30	Baseline	1uM Fentanyl	Fent	68
32	Baseline	1uM Fentanyl	Fent	80
34	Baseline	1uM Fentanyl	Fent	76
36	Baseline	1uM Fentanyl	Fent	73
37	Baseline	1uM Fentanyl	Fent	66
38	Baseline	1uM Fentanyl	Fent	117
41	Baseline	1uM Fentanyl	Fent	81
28	Treatment	1uM Fentanyl	Fent	25	40.9836
29	Treatment	1uM Fentanyl	Fent	5	7.04225
30	Treatment	1uM Fentanyl	Fent	9	13.2353
32	Treatment	1uM Fentanyl	Fent	78	97.5
34	Treatment	1uM Fentanyl	Fent	7	9.21053
36	Treatment	1uM Fentanyl	Fent	38	52.0548
37	Treatment	1uM Fentanyl	Fent	39	59.0909
38	Treatment	1uM Fentanyl	Fent	55	47.0085
41	Treatment	1uM Fentanyl	Fent	8	9.87654
1	Baseline	10uM naloxone + 1uM Fentanyl	FN-10	120
2	Baseline	10uM naloxone + 1uM Fentanyl	FN-10	62
4	Baseline	10uM naloxone + 1uM Fentanyl	FN-10	91
5	Baseline	10uM naloxone + 1uM Fentanyl	FN-10	82
6	Baseline	10uM naloxone + 1uM Fentanyl	FN-10	107
7	Baseline	10uM naloxone + 1uM Fentanyl	FN-10	65
9	Baseline	10uM naloxone + 1uM Fentanyl	FN-10	86
1	Treatment	10uM naloxone + 1uM Fentanyl	FN-10	62	51.6667
2	Treatment	10uM naloxone + 1uM Fentanyl	FN-10	72	116.129
4	Treatment	10uM naloxone + 1uM Fentanyl	FN-10	71	78.022
5	Treatment	10uM naloxone + 1uM Fentanyl	FN-10	102	124.39
6	Treatment	10uM naloxone + 1uM Fentanyl	FN-10	65	60.7477
7	Treatment	10uM naloxone + 1uM Fentanyl	FN-10	55	84.6154
9	Treatment	10uM naloxone + 1uM Fentanyl	FN-10	49	56.9767
11	Baseline	Fent + Nal-20	FN-20	120
12	Baseline	Fent + Nal-20	FN-20	62
14	Baseline	Fent + Nal-20	FN-20	91
15	Baseline	Fent + Nal-20	FN-20	82
16	Baseline	Fent + Nal-20	FN-20	107
17	Baseline	Fent + Nal-20	FN-20	65
20	Baseline	Fent + Nal-20	FN-20	86
11	Treatment	Fent + Nal-20	FN-20	110	211.538
12	Treatment	Fent + Nal-20	FN-20	71	116.393
14	Treatment	Fent + Nal-20	FN-20	94	116.049
15	Treatment	Fent + Nal-20	FN-20	120	144.578
16	Treatment	Fent + Nal-20	FN-20	97	167.241
17	Treatment	Fent + Nal-20	FN-20	100	120.482
20	Treatment	Fent + Nal-20	FN-20	46	115
56	Baseline	1uM Fentanyl + 4uM CTAP	FCTAP	159
58	Baseline	1uM Fentanyl + 4uM CTAP	FCTAP	129
59	Baseline	1uM Fentanyl + 4uM CTAP	FCTAP	110
60	Baseline	1uM Fentanyl + 4uM CTAP	FCTAP	117
61	Baseline	1uM Fentanyl + 4uM CTAP	FCTAP	124
62	Baseline	1uM Fentanyl + 4uM CTAP	FCTAP	107
63	Baseline	1uM Fentanyl + 4uM CTAP	FCTAP	92
64	Baseline	1uM Fentanyl + 4uM CTAP	FCTAP	85
65	Baseline	1uM Fentanyl + 4uM CTAP	FCTAP	119
66	Baseline	1uM Fentanyl + 4uM CTAP	FCTAP	54
56	Treatment	1uM Fentanyl + 4uM CTAP	FCTAP	111	69.8113
58	Treatment	1uM Fentanyl + 4uM CTAP	FCTAP	101	78.2946
59	Treatment	1uM Fentanyl + 4uM CTAP	FCTAP	135	122.727
60	Treatment	1uM Fentanyl + 4uM CTAP	FCTAP	61	52.1368
61	Treatment	1uM Fentanyl + 4uM CTAP	FCTAP	159	128.226
62	Treatment	1uM Fentanyl + 4uM CTAP	FCTAP	141	131.776
63	Treatment	1uM Fentanyl + 4uM CTAP	FCTAP	163	177.174
64	Treatment	1uM Fentanyl + 4uM CTAP	FCTAP	17	20
65	Treatment	1uM Fentanyl + 4uM CTAP	FCTAP	36	30.2521

## Sheet: Figure3C
Animal #	Conditions	Groups	Grp	Rate	%baseline
1	Baseline	Control	Ctrl	61
2	Baseline	Control	Ctrl	123
3	Baseline	Control	Ctrl	76
4	Baseline	Control	Ctrl	117
5	Baseline	Control	Ctrl	65
6	Baseline	Control	Ctrl	63
7	Baseline	Control	Ctrl	88
8	Baseline	Control	Ctrl	114
9	Baseline	Control	Ctrl	67
10	Baseline	Control	Ctrl	70
11	Baseline	Control	Ctrl	131
1	Treatment	Control	Ctrl	75	122.951
2	Treatment	Control	Ctrl	120	97.561
3	Treatment	Control	Ctrl	69	90.7895
4	Treatment	Control	Ctrl	112	95.7265
5	Treatment	Control	Ctrl	48	73.8462
6	Treatment	Control	Ctrl	107	169.841
7	Treatment	Control	Ctrl	65	73.8636
8	Treatment	Control	Ctrl	40	35.0877
9	Treatment	Control	Ctrl	90	134.328
10	Treatment	Control	Ctrl	115	164.286
11	Treatment	Control	Ctrl	80	61.0687
22	Baseline	5uM Naloxone	Nal-5	61
23	Baseline	5uM Naloxone	Nal-5	101
24	Baseline	5uM Naloxone	Nal-5	92
25	Baseline	5uM Naloxone	Nal-5	68
26	Baseline	5uM Naloxone	Nal-5	89
22	Treatment	5uM Naloxone	Nal-5	51	83.6066
23	Treatment	5uM Naloxone	Nal-5	65	64.3564
24	Treatment	5uM Naloxone	Nal-5	130	141.304
25	Treatment	5uM Naloxone	Nal-5	64	94.1176
26	Treatment	5uM Naloxone	Nal-5	103	115.73
29	Baseline	10uM naloxone	Nal-10	99
30	Baseline	10uM naloxone	Nal-10	62
31	Baseline	10uM naloxone	Nal-10	95
32	Baseline	10uM naloxone	Nal-10	129
33	Baseline	10uM naloxone	Nal-10	113
34	Baseline	10uM naloxone	Nal-10	86
35	Baseline	10uM naloxone	Nal-10	66
36	Baseline	10uM naloxone	Nal-10	94
29	Treatment	10uM naloxone	Nal-10	64	64.6465
30	Treatment	10uM naloxone	Nal-10	54	87.0968
31	Treatment	10uM naloxone	Nal-10	95	100
32	Treatment	10uM naloxone	Nal-10	60	46.5116
33	Treatment	10uM naloxone	Nal-10	103	91.1504
34	Treatment	10uM naloxone	Nal-10	81	94.186
35	Treatment	10uM naloxone	Nal-10	73	110.606
36	Treatment	10uM naloxone	Nal-10	89	94.6809
38	Baseline	20uM naloxone	Nal-20	99
39	Baseline	20uM naloxone	Nal-20	78
40	Baseline	20uM naloxone	Nal-20	78
41	Baseline	20uM naloxone	Nal-20	139
46	Baseline	20uM naloxone	Nal-20	70
49	Baseline	20uM naloxone	Nal-20	151
38	Treatment	20uM naloxone	Nal-20	113	114.141
39	Treatment	20uM naloxone	Nal-20	116	148.718
40	Treatment	20uM naloxone	Nal-20	134	171.795
41	Treatment	20uM naloxone	Nal-20	123	88.4892
46	Treatment	20uM naloxone	Nal-20	179	255.714
49	Treatment	20uM naloxone	Nal-20	138	91.3907
12	Baseline	4uM CTAP	CTAP	118
13	Baseline	4uM CTAP	CTAP	115
14	Baseline	4uM CTAP	CTAP	141
15	Baseline	4uM CTAP	CTAP	103
16	Baseline	4uM CTAP	CTAP	62
17	Baseline	4uM CTAP	CTAP	134
18	Baseline	4uM CTAP	CTAP	135
19	Baseline	4uM CTAP	CTAP	102
20	Baseline	4uM CTAP	CTAP	67
21	Baseline	4uM CTAP	CTAP	122
12	Treatment	4uM CTAP	CTAP	130	110.169
13	Treatment	4uM CTAP	CTAP	73	63.4783
14	Treatment	4uM CTAP	CTAP	60	42.5532
15	Treatment	4uM CTAP	CTAP	88	85.4369
16	Treatment	4uM CTAP	CTAP	49	79.0323
17	Treatment	4uM CTAP	CTAP	131	97.7612
18	Treatment	4uM CTAP	CTAP	60	44.4444
19	Treatment	4uM CTAP	CTAP	125	122.549
20	Treatment	4uM CTAP	CTAP	16	23.8806
21	Treatment	4uM CTAP	CTAP	103	84.4262

## Sheet: Figure3D
Animal #	Conditions	Groups	Grp	Rate	%baseline
2	Baseline	Baseline		142	100
3	Baseline	Baseline		89	100
5	Baseline	Baseline		69	100
8	Baseline	Baseline		81	100
9	Baseline	Baseline		67	100
11	Baseline	Baseline		69	100
14	Baseline	Baseline		102	100
16	Baseline	Baseline		83	100
2	5 min	1uM Fentanyl		156	109.859
3	5 min	1uM Fentanyl		18	20.2247
5	5 min	1uM Fentanyl		111	160.87
8	5 min	1uM Fentanyl		5	6.17284
9	5 min	1uM Fentanyl		3	4.47761
11	5 min	1uM Fentanyl		0	0
14	5 min	1uM Fentanyl		15	14.7059
16	5 min	1uM Fentanyl		80	96.3855
2	10 min	9.1uM Naloxone + Fentanyl		115	80.9859
3	10 min	9.1uM Naloxone + Fentanyl		117	131.461
5	10 min	9.1uM Naloxone + Fentanyl		65	94.2029
8	10 min	9.1uM Naloxone + Fentanyl		85	104.938
9	10 min	9.1uM Naloxone + Fentanyl		146	217.91
11	10 min	9.1uM Naloxone + Fentanyl		0	0
14	10 min	9.1uM Naloxone + Fentanyl		75	73.5294
16	10 min	9.1uM Naloxone + Fentanyl		65	78.3133

## Sheet: Figure3E
Animal #	Conditions	Grp	Rate	%baseline
4	Baseline	AB	61
5	Baseline	AB	71
6	Baseline	AB	68
8	Baseline	AB	80
10	Baseline	AB	76
12	Baseline	AB	73
13	Baseline	AB	66
14	Baseline	AB	117
17	Baseline	AB	81
4	Treatment	AB	25	40.9836
5	Treatment	AB	5	7.04225
6	Treatment	AB	9	13.2353
8	Treatment	AB	78	97.5
10	Treatment	AB	7	9.21053
12	Treatment	AB	38	52.0548
13	Treatment	AB	39	59.0909
14	Treatment	AB	55	47.0085
17	Treatment	AB	8	9.87654
18	Baseline	TU	86
19	Baseline	TU	102
20	Baseline	TU	139
21	Baseline	TU	83
22	Baseline	TU	84
23	Baseline	TU	143
24	Baseline	TU	135
25	Baseline	TU	84
26	Baseline	TU	142
18	Treatment	TU	124	144.186
19	Treatment	TU	139	136.275
20	Treatment	TU	145	104.317
21	Treatment	TU	160	192.771
22	Treatment	TU	166	197.619
23	Treatment	TU	112	78.3217
24	Treatment	TU	113	83.7037
25	Treatment	TU	55	65.4762
26	Treatment	TU	149	104.93
27	Baseline	AB x TU	101
28	Baseline	AB x TU	77
29	Baseline	AB x TU	139
30	Baseline	AB x TU	105
31	Baseline	AB x TU	145
32	Baseline	AB x TU	95
33	Baseline	AB x TU	82
27	Treatment	AB x TU	162	160.396
28	Treatment	AB x TU	106	137.662
29	Treatment	AB x TU	115	82.7338
30	Treatment	AB x TU	134	127.619
31	Treatment	AB x TU	134	92.4138
32	Treatment	AB x TU	128	134.737
33	Treatment	AB x TU	118	143.902

## Sheet: Figure3F
Animal #	Conditions	Groups		Rate	Rate (treat)	%baseline	Rate(criteria)	%baseline(criteria
2	Baseline	Control (embryo water)		115
4	Baseline	Control (embryo water)		62
7	Baseline	Control (embryo water)		99
8	Baseline	Control (embryo water)		91
9	Baseline	Control (embryo water)		99
13	Baseline	Control (embryo water)		69
14	Baseline	Control (embryo water)		97
16	Baseline	Control (embryo water)		89
18	Baseline	Control (embryo water)		138
19	Baseline	Control (embryo water)		65
21	Baseline	Control (embryo water)		101
22	Baseline	Control (embryo water)		61
2	Treatment	Control (embryo water)		101	101	87.8261	101	87.8261
4	Treatment	Control (embryo water)		66	66	106.452	66	106.452
7	Treatment	Control (embryo water)		104	104	105.051	104	105.051
8	Treatment	Control (embryo water)		87	87	95.6044	87	95.6044
9	Treatment	Control (embryo water)		104	104	105.051	104	105.051
13	Treatment	Control (embryo water)		47	47	68.1159	47	68.1159
14	Treatment	Control (embryo water)		40	40	41.2371	40	41.2371
16	Treatment	Control (embryo water)		87	87	97.7528	87	97.7528
18	Treatment	Control (embryo water)		102	102	73.913	102	73.913
19	Treatment	Control (embryo water)		73	73	112.308	73	112.308
21	Treatment	Control (embryo water)		79	79	78.2178	79	78.2178
22	Treatment	Control (embryo water)		75	75	122.951	75	122.951
25	Baseline	1 uM Morphine		119
30	Baseline	1 uM Morphine		67
32	Baseline	1 uM Morphine		111
33	Baseline	1 uM Morphine		97
34	Baseline	1 uM Morphine		64
35	Baseline	1 uM Morphine		91
25	Treatment	1 uM Morphine		85	85	71.4286	85	71.4286
30	Treatment	1 uM Morphine		47	47	70.1493	47	70.1493
32	Treatment	1 uM Morphine		18	18	16.2162	18	16.2162
33	Treatment	1 uM Morphine		29	29	29.8969	29	29.8969
34	Treatment	1 uM Morphine		51	51	79.6875	51	79.6875
35	Treatment	1 uM Morphine		122	122	134.066	122	134.066
37	Baseline	10 uM Morphine		86
39	Baseline	10 uM Morphine		80
40	Baseline	10 uM Morphine		67
41	Baseline	10 uM Morphine		124
42	Baseline	10 uM Morphine		69
44	Baseline	10 uM Morphine		137
46	Baseline	10 uM Morphine		97
47	Baseline	10 uM Morphine		77
37	Treatment	10 uM Morphine		43	43	50	43	50
39	Treatment	10 uM Morphine		42	42	52.5	42	52.5
40	Treatment	10 uM Morphine		67	67	100	67	100
41	Treatment	10 uM Morphine		60	60	48.3871	60	48.3871
42	Treatment	10 uM Morphine		64	64	92.7536	64	92.7536
44	Treatment	10 uM Morphine		73	73	53.2847	73	53.2847
46	Treatment	10 uM Morphine		61	61	62.8866	61	62.8866
47	Treatment	10 uM Morphine		75	75	97.4026	75	97.4026
48	Baseline	20 uM Morphine		66
49	Baseline	20 uM Morphine		97
50	Baseline	20 uM Morphine		63
51	Baseline	20 uM Morphine		102
53	Baseline	20 uM Morphine		96
54	Baseline	20 uM Morphine		89
55	Baseline	20 uM Morphine		63
56	Baseline	20 uM Morphine		92
57	Baseline	20 uM Morphine		107
58	Baseline	20 uM Morphine		70
59	Baseline	20 uM Morphine		90
48	Treatment	20 uM Morphine		47	47	71.2121	47	71.2121
49	Treatment	20 uM Morphine		62	62	63.9175	62	63.9175
50	Treatment	20 uM Morphine		35	35	55.5556	35	55.5556
51	Treatment	20 uM Morphine		94	94	92.1569	94	92.1569
53	Treatment	20 uM Morphine		91	91	94.7917	91	94.7917
54	Treatment	20 uM Morphine		83	83	93.2584	83	93.2584
55	Treatment	20 uM Morphine		74	74	117.46	74	117.46
56	Treatment	20 uM Morphine		83	83	90.2174	83	90.2174
57	Treatment	20 uM Morphine		79	79	73.8318	79	73.8318
58	Treatment	20 uM Morphine		77	77	110	77	110
59	Treatment	20 uM Morphine		61	61	67.7778	61	67.7778
60	Baseline	50 uM Morphine		94
61	Baseline	50 uM Morphine		139
62	Baseline	50 uM Morphine		136
63	Baseline	50 uM Morphine		68
64	Baseline	50 uM Morphine		100
67	Baseline	50 uM Morphine		141
68	Baseline	50 uM Morphine		132
70	Baseline	50 uM Morphine		97
71	Baseline	50 uM Morphine		83
60	Treatment	50 uM Morphine		94	94	100	94	100
61	Treatment	50 uM Morphine		25	25	17.9856	25	17.9856
62	Treatment	50 uM Morphine		114	114	83.8235	114	83.8235
63	Treatment	50 uM Morphine		82	82	120.588	82	120.588
64	Treatment	50 uM Morphine		56	56	56	56	56
67	Treatment	50 uM Morphine		68	68	48.227	68	48.227
68	Treatment	50 uM Morphine		118	118	89.3939	118	89.3939
70	Treatment	50 uM Morphine		75	75	77.3196	75	77.3196
71	Treatment	50 uM Morphine		60	60	72.2892	60	72.2892
73	Baseline	200uM Morphine		95
74	Baseline	200uM Morphine		79
75	Baseline	200uM Morphine		70
78	Baseline	200uM Morphine		99
80	Baseline	200uM Morphine		63
81	Baseline	200uM Morphine		127
82	Baseline	200uM Morphine		108
83	Baseline	200uM Morphine		88
84	Baseline	200uM Morphine		39
73	Treatment	200uM Morphine		85	85	89.4737	85	89.4737
74	Treatment	200uM Morphine		138	138	174.684	138	174.684
75	Treatment	200uM Morphine		86	86	122.857	86	122.857
78	Treatment	200uM Morphine		48	48	48.4848	48	48.4848
80	Treatment	200uM Morphine		57	57	90.4762	57	90.4762
81	Treatment	200uM Morphine		100	100	78.7402	100	78.7402
82	Treatment	200uM Morphine		47	47	43.5185	47	43.5185
83	Treatment	200uM Morphine		87	87	98.8636	87	98.8636
