# Supplementary material for: Respiratory depression and analgesia by opioid drugs in freely behaving larval zebrafish
Source: eLife. 2021 Mar 15;10:e63407. doi: 10.7554/eLife.63407 (PMC8060028; doi:10.7554/eLife.63407)
Supplement: Figure 4—source data 1. [file elife-63407-fig4-data1.xlsx]

## Sheet: Figure4A
Animal #	Conditions	Groups		Rate	%baseline
1	Baseline	Control (embryo water)		83
3	Baseline	Control (embryo water)		110
4	Baseline	Control (embryo water)		120
5	Baseline	Control (embryo water)		111
6	Baseline	Control (embryo water)		94
7	Baseline	Control (embryo water)		63
8	Baseline	Control (embryo water)		61
9	Baseline	Control (embryo water)		63
11	Baseline	Control (embryo water)		80
1	Treatment	Control (embryo water)		83	100
3	Treatment	Control (embryo water)		85	77.2727
4	Treatment	Control (embryo water)		113	94.1667
5	Treatment	Control (embryo water)		114	102.703
6	Treatment	Control (embryo water)		79	84.0426
7	Treatment	Control (embryo water)		38	60.3175
8	Treatment	Control (embryo water)		66	108.197
9	Treatment	Control (embryo water)		68	107.937
11	Treatment	Control (embryo water)		65	81.25
57	Baseline	1uM Fentanyl		112
58	Baseline	1uM Fentanyl		63
59	Baseline	1uM Fentanyl		71
60	Baseline	1uM Fentanyl		62
61	Baseline	1uM Fentanyl		135
57	Treatment	1uM Fentanyl		18	16.0714
58	Treatment	1uM Fentanyl		86	136.508
59	Treatment	1uM Fentanyl		12	16.9014
60	Treatment	1uM Fentanyl		38	61.2903
61	Treatment	1uM Fentanyl		37	27.4074
35	Baseline	1uM Fentanyl + 10uM BIMU8		108
36	Baseline	1uM Fentanyl + 10uM BIMU8		130
37	Baseline	1uM Fentanyl + 10uM BIMU8		97
38	Baseline	1uM Fentanyl + 10uM BIMU8		150
40	Baseline	1uM Fentanyl + 10uM BIMU8		80
41	Baseline	1uM Fentanyl + 10uM BIMU8		63
42	Baseline	1uM Fentanyl + 10uM BIMU8		77
43	Baseline	1uM Fentanyl + 10uM BIMU8		94
44	Baseline	1uM Fentanyl + 10uM BIMU8		93
45	Baseline	1uM Fentanyl + 10uM BIMU8		96
46	Baseline	1uM Fentanyl + 10uM BIMU8		83
47	Baseline	1uM Fentanyl + 10uM BIMU8		125
48	Baseline	1uM Fentanyl + 10uM BIMU8		120
49	Baseline	1uM Fentanyl + 10uM BIMU8		65
50	Baseline	1uM Fentanyl + 10uM BIMU8		70
51	Baseline	1uM Fentanyl + 10uM BIMU8		105
52	Baseline	1uM Fentanyl + 10uM BIMU8		127
53	Baseline	1uM Fentanyl + 10uM BIMU8		145
54	Baseline	1uM Fentanyl + 10uM BIMU8		102
55	Baseline	1uM Fentanyl + 10uM BIMU8		103
35	Treatment	1uM Fentanyl + 10uM BIMU8		101	93.5185
36	Treatment	1uM Fentanyl + 10uM BIMU8		43	33.0769
37	Treatment	1uM Fentanyl + 10uM BIMU8		71	73.1959
38	Treatment	1uM Fentanyl + 10uM BIMU8		80	53.3333
40	Treatment	1uM Fentanyl + 10uM BIMU8		42	52.5
41	Treatment	1uM Fentanyl + 10uM BIMU8		37	58.7302
42	Treatment	1uM Fentanyl + 10uM BIMU8		61	79.2208
43	Treatment	1uM Fentanyl + 10uM BIMU8		21	22.3404
44	Treatment	1uM Fentanyl + 10uM BIMU8		110	118.28
45	Treatment	1uM Fentanyl + 10uM BIMU8		29	30.2083
46	Treatment	1uM Fentanyl + 10uM BIMU8		95	114.458
47	Treatment	1uM Fentanyl + 10uM BIMU8		98	78.4
48	Treatment	1uM Fentanyl + 10uM BIMU8		80	66.6667
49	Treatment	1uM Fentanyl + 10uM BIMU8		26	40
50	Treatment	1uM Fentanyl + 10uM BIMU8		33	47.1429
51	Treatment	1uM Fentanyl + 10uM BIMU8		99	94.2857
52	Treatment	1uM Fentanyl + 10uM BIMU8		17	13.3858
53	Treatment	1uM Fentanyl + 10uM BIMU8		9	6.2069
54	Treatment	1uM Fentanyl + 10uM BIMU8		4	3.92157
55	Treatment	1uM Fentanyl + 10uM BIMU8		22	21.3592
13	Baseline	10uM BIMU8		65
14	Baseline	10uM BIMU8		95
15	Baseline	10uM BIMU8		136
16	Baseline	10uM BIMU8		86
17	Baseline	10uM BIMU8		132
18	Baseline	10uM BIMU8		62
19	Baseline	10uM BIMU8		108
20	Baseline	10uM BIMU8		123
21	Baseline	10uM BIMU8		90
22	Baseline	10uM BIMU8		115
23	Baseline	10uM BIMU8		100
24	Baseline	10uM BIMU8		145
25	Baseline	10uM BIMU8		142
26	Baseline	10uM BIMU8		84
27	Baseline	10uM BIMU8		64
28	Baseline	10uM BIMU8		90
30	Baseline	10uM BIMU8		150
31	Baseline	10uM BIMU8		137
32	Baseline	10uM BIMU8		123
33	Baseline	10uM BIMU8		99
34	Baseline	10uM BIMU8		89
13	Treatment	10uM BIMU8		74	113.846
14	Treatment	10uM BIMU8		84	88.4211
15	Treatment	10uM BIMU8		71	52.2059
16	Treatment	10uM BIMU8		74	86.0465
17	Treatment	10uM BIMU8		85	64.3939
18	Treatment	10uM BIMU8		69	111.29
19	Treatment	10uM BIMU8		102	94.4444
20	Treatment	10uM BIMU8		111	90.2439
21	Treatment	10uM BIMU8		68	75.5556
22	Treatment	10uM BIMU8		140	121.739
23	Treatment	10uM BIMU8		72	72
24	Treatment	10uM BIMU8		71	48.9655
25	Treatment	10uM BIMU8		68	47.8873
26	Treatment	10uM BIMU8		68	80.9524
27	Treatment	10uM BIMU8		72	112.5
28	Treatment	10uM BIMU8		69	76.6667
30	Treatment	10uM BIMU8		118	78.6667
31	Treatment	10uM BIMU8		97	70.8029
32	Treatment	10uM BIMU8		57	46.3415
33	Treatment	10uM BIMU8		76	76.7677
34	Treatment	10uM BIMU8		46	51.6854

## Sheet: Figure4B
Animal #	Conditions	Groups	Grp	Rate	%baseline
1	Baseline	Control (embryo water)		107
2	Baseline	Control (embryo water)		124
4	Baseline	Control (embryo water)		141
5	Baseline	Control (embryo water)		95
6	Baseline	Control (embryo water)		128
8	Baseline	Control (embryo water)		77
13	Baseline	Control (embryo water)		65
1	Treatment	Control (embryo water)		64	59.8131
2	Treatment	Control (embryo water)		94	75.8065
4	Treatment	Control (embryo water)		95	67.3759
5	Treatment	Control (embryo water)		38	40
6	Treatment	Control (embryo water)		123	96.0938
8	Treatment	Control (embryo water)		119	154.545
13	Treatment	Control (embryo water)		74	113.846
33	Baseline	1uM Fentanyl		88
34	Baseline	1uM Fentanyl		133
35	Baseline	1uM Fentanyl		129
37	Baseline	1uM Fentanyl		151
40	Baseline	1uM Fentanyl		147
42	Baseline	1uM Fentanyl		122
43	Baseline	1uM Fentanyl		120
33	Treatment	1uM Fentanyl		21	23.8636
34	Treatment	1uM Fentanyl		24	18.0451
35	Treatment	1uM Fentanyl		24	18.6047
37	Treatment	1uM Fentanyl		17	11.2583
40	Treatment	1uM Fentanyl		101	68.7075
42	Treatment	1uM Fentanyl		19	15.5738
43	Treatment	1uM Fentanyl		33	27.5
24	Baseline	1uM Fentanyl + 5uM CX614 (0.0016% DMSO)		79
27	Baseline	1uM Fentanyl + 5uM CX614 (0.0016% DMSO)		89
28	Baseline	1uM Fentanyl + 5uM CX614 (0.0016% DMSO)		73
29	Baseline	1uM Fentanyl + 5uM CX614 (0.0016% DMSO)		118
30	Baseline	1uM Fentanyl + 5uM CX614 (0.0016% DMSO)		99
32	Baseline	1uM Fentanyl + 5uM CX614 (0.0016% DMSO)		108
24	Treatment	1uM Fentanyl + 5uM CX614 (0.0016% DMSO)		122	154.43
27	Treatment	1uM Fentanyl + 5uM CX614 (0.0016% DMSO)		139	156.18
28	Treatment	1uM Fentanyl + 5uM CX614 (0.0016% DMSO)		143	195.89
29	Treatment	1uM Fentanyl + 5uM CX614 (0.0016% DMSO)		142	120.339
30	Treatment	1uM Fentanyl + 5uM CX614 (0.0016% DMSO)		100	101.01
32	Treatment	1uM Fentanyl + 5uM CX614 (0.0016% DMSO)		120	111.111
14	Baseline	5uM CX614 (0.0016% DMSO)		70
15	Baseline	5uM CX614 (0.0016% DMSO)		116
16	Baseline	5uM CX614 (0.0016% DMSO)		148
17	Baseline	5uM CX614 (0.0016% DMSO)		74
18	Baseline	5uM CX614 (0.0016% DMSO)		111
19	Baseline	5uM CX614 (0.0016% DMSO)		83
20	Baseline	5uM CX614 (0.0016% DMSO)		91
22	Baseline	5uM CX614 (0.0016% DMSO)		106
14	Treatment	5uM CX614 (0.0016% DMSO)		70	100
15	Treatment	5uM CX614 (0.0016% DMSO)		99	85.3448
16	Treatment	5uM CX614 (0.0016% DMSO)		124	83.7838
17	Treatment	5uM CX614 (0.0016% DMSO)		110	148.649
18	Treatment	5uM CX614 (0.0016% DMSO)		133	119.82
19	Treatment	5uM CX614 (0.0016% DMSO)		135	162.651
20	Treatment	5uM CX614 (0.0016% DMSO)		139	152.747
22	Treatment	5uM CX614 (0.0016% DMSO)		159	150
44	Baseline	0.0016% DMSO (vehicle)		116
45	Baseline	0.0016% DMSO (vehicle)		111
46	Baseline	0.0016% DMSO (vehicle)		111
47	Baseline	0.0016% DMSO (vehicle)		113
48	Baseline	0.0016% DMSO (vehicle)		90
50	Baseline	0.0016% DMSO (vehicle)		69
52	Baseline	0.0016% DMSO (vehicle)		88
44	Treatment	0.0016% DMSO (vehicle)		97	83.6207
45	Treatment	0.0016% DMSO (vehicle)		89	80.1802
46	Treatment	0.0016% DMSO (vehicle)		33	29.7297
47	Treatment	0.0016% DMSO (vehicle)		36	31.8584
48	Treatment	0.0016% DMSO (vehicle)		52	57.7778
50	Treatment	0.0016% DMSO (vehicle)		73	105.797
52	Treatment	0.0016% DMSO (vehicle)		53	60.2273

## Sheet: Figure4C
Animal #	Conditions	Groups		Rate	%baseline
1	Baseline	Control (embryo water)		69
3	Baseline	Control (embryo water)		70
4	Baseline	Control (embryo water)		105
5	Baseline	Control (embryo water)		87
6	Baseline	Control (embryo water)		75
8	Baseline	Control (embryo water)		116
9	Baseline	Control (embryo water)		113
10	Baseline	Control (embryo water)		109
1	Treatment	Control (embryo water)		56	81.1594
3	Treatment	Control (embryo water)		141	201.429
4	Treatment	Control (embryo water)		129	122.857
5	Treatment	Control (embryo water)		117	134.483
6	Treatment	Control (embryo water)		98	130.667
8	Treatment	Control (embryo water)		91	78.4483
9	Treatment	Control (embryo water)		50	44.2478
10	Treatment	Control (embryo water)		92	84.4037
12	Baseline	1% DMSO (vehicle)		124
13	Baseline	1% DMSO (vehicle)		64
17	Baseline	1% DMSO (vehicle)		94
19	Baseline	1% DMSO (vehicle)		70
20	Baseline	1% DMSO (vehicle)		131
12	Treatment	1% DMSO (vehicle)		101	81.4516
13	Treatment	1% DMSO (vehicle)		65	101.562
17	Treatment	1% DMSO (vehicle)		54	57.4468
19	Treatment	1% DMSO (vehicle)		89	127.143
20	Treatment	1% DMSO (vehicle)		116	88.5496
21	Baseline	60uM Lidocaine		66
22	Baseline	60uM Lidocaine		81
23	Baseline	60uM Lidocaine		96
24	Baseline	60uM Lidocaine		140
21	Treatment	60uM Lidocaine		41	62.1212
22	Treatment	60uM Lidocaine		57	70.3704
23	Treatment	60uM Lidocaine		92	95.8333
24	Treatment	60uM Lidocaine		75	53.5714
