# Supplementary material for: Respiratory depression and analgesia by opioid drugs in freely behaving larval zebrafish
Source: eLife. 2021 Mar 15;10:e63407. doi: 10.7554/eLife.63407 (PMC8060028; doi:10.7554/eLife.63407)
Supplement: Figure 5—source data 1. [file elife-63407-fig5-data1.xlsx]

## Sheet: Figure5C
Animal	Group	Condition	Time	Velocity
1	Control (embryo water)	Baseline	0	0.423724
1	Control (embryo water)	Treatment	1	0.395495
1	Control (embryo water)	Treatment	2	0.0431113
1	Control (embryo water)	Treatment	3	0.0575992
1	Control (embryo water)	Treatment	4	0.0319595
1	Control (embryo water)	Treatment	5	0.0333805
1	Control (embryo water)	Treatment	6	0.0457988
1	Control (embryo water)	Treatment	7	0.220382
1	Control (embryo water)	Treatment	8	0.98918
1	Control (embryo water)	Treatment	9	1.25249
1	Control (embryo water)	Treatment	10	0.493523
1	Control (embryo water)	Treatment	11	0.0637902
1	Control (embryo water)	Treatment	12	0.106674
1	Control (embryo water)	Treatment	13	0.131732
1	Control (embryo water)	Treatment	14	0.117826
1	Control (embryo water)	Treatment	15	0.112719
1	Control (embryo water)	Treatment	16	0.12179
1	Control (embryo water)	Treatment	17	0.0974215
1	Control (embryo water)	Treatment	18	0.165918
1	Control (embryo water)	Treatment	19	0.107131
1	Control (embryo water)	Treatment	20	0.268835
2	Control (embryo water)	Baseline	0	0.764157
2	Control (embryo water)	Treatment	1	0.0441678
2	Control (embryo water)	Treatment	2	0.359467
2	Control (embryo water)	Treatment	3	0.480613
2	Control (embryo water)	Treatment	4	0.667322
2	Control (embryo water)	Treatment	5	0.642698
2	Control (embryo water)	Treatment	6	0.483472
2	Control (embryo water)	Treatment	7	0.821232
2	Control (embryo water)	Treatment	8	0.773612
2	Control (embryo water)	Treatment	9	0.32968
2	Control (embryo water)	Treatment	10	0.346543
2	Control (embryo water)	Treatment	11	1.78358
2	Control (embryo water)	Treatment	12	1.46004
2	Control (embryo water)	Treatment	13	1.99952
2	Control (embryo water)	Treatment	14	1.85283
2	Control (embryo water)	Treatment	15	1.36763
2	Control (embryo water)	Treatment	16	0.633252
2	Control (embryo water)	Treatment	17	0.0897522
2	Control (embryo water)	Treatment	18	0.606835
2	Control (embryo water)	Treatment	19	0.450875
2	Control (embryo water)	Treatment	20	0.786888
3	Control (embryo water)	Baseline	0	1.20446
3	Control (embryo water)	Treatment	1	0.104938
3	Control (embryo water)	Treatment	2	0.0892435
3	Control (embryo water)	Treatment	3	0.0895752
3	Control (embryo water)	Treatment	4	0.125353
3	Control (embryo water)	Treatment	5	0.0404228
3	Control (embryo water)	Treatment	6	0.229973
3	Control (embryo water)	Treatment	7	0.570795
3	Control (embryo water)	Treatment	8	0.932705
3	Control (embryo water)	Treatment	9	0.0752773
3	Control (embryo water)	Treatment	10	0.0304152
3	Control (embryo water)	Treatment	11	0.0356322
3	Control (embryo water)	Treatment	12	1.7176
3	Control (embryo water)	Treatment	13	3.43945
3	Control (embryo water)	Treatment	14	3.7275
3	Control (embryo water)	Treatment	15	2.7301
3	Control (embryo water)	Treatment	16	1.84372
3	Control (embryo water)	Treatment	17	0.0723322
3	Control (embryo water)	Treatment	18	0.0534952
3	Control (embryo water)	Treatment	19	0.0367673
3	Control (embryo water)	Treatment	20	0.0251792
4	Control (embryo water)	Baseline	0	0.0715447
4	Control (embryo water)	Treatment	1	0.0331032
4	Control (embryo water)	Treatment	2	0.046896
4	Control (embryo water)	Treatment	3	0.0393307
4	Control (embryo water)	Treatment	4	0.0333552
4	Control (embryo water)	Treatment	5	0.0378927
4	Control (embryo water)	Treatment	6	0.0318808
4	Control (embryo water)	Treatment	7	0.159499
4	Control (embryo water)	Treatment	8	0.0398583
4	Control (embryo water)	Treatment	9	0.0341437
4	Control (embryo water)	Treatment	10	0.066896
4	Control (embryo water)	Treatment	11	0.04337
4	Control (embryo water)	Treatment	12	0.0808875
4	Control (embryo water)	Treatment	13	0.217368
4	Control (embryo water)	Treatment	14	0.0741332
4	Control (embryo water)	Treatment	15	0.144017
4	Control (embryo water)	Treatment	16	0.117532
4	Control (embryo water)	Treatment	17	0.112215
4	Control (embryo water)	Treatment	18	0.1015
4	Control (embryo water)	Treatment	19	0.116796
4	Control (embryo water)	Treatment	20	0.15354
5	Control (embryo water)	Baseline	0	0.338299
5	Control (embryo water)	Treatment	1	0.100709
5	Control (embryo water)	Treatment	2	2.14588
5	Control (embryo water)	Treatment	3	0.329928
5	Control (embryo water)	Treatment	4	0.700555
5	Control (embryo water)	Treatment	5	1.50372
5	Control (embryo water)	Treatment	6	2.25125
5	Control (embryo water)	Treatment	7	2.4665
5	Control (embryo water)	Treatment	8	2.09647
5	Control (embryo water)	Treatment	9	0.0672247
5	Control (embryo water)	Treatment	10	0.4993
5	Control (embryo water)	Treatment	11	1.21351
5	Control (embryo water)	Treatment	12	1.53245
5	Control (embryo water)	Treatment	13	1.65002
5	Control (embryo water)	Treatment	14	1.26173
5	Control (embryo water)	Treatment	15	0.455933
5	Control (embryo water)	Treatment	16	1.40336
5	Control (embryo water)	Treatment	17	1.34028
5	Control (embryo water)	Treatment	18	1.38246
5	Control (embryo water)	Treatment	19	1.67877
5	Control (embryo water)	Treatment	20	2.37138
6	Control (embryo water)	Baseline	0	0.25718
6	Control (embryo water)	Treatment	1	0.182215
6	Control (embryo water)	Treatment	2	0.307642
6	Control (embryo water)	Treatment	3	0.351575
6	Control (embryo water)	Treatment	4	0.515167
6	Control (embryo water)	Treatment	5	0.264717
6	Control (embryo water)	Treatment	6	0.042898
6	Control (embryo water)	Treatment	7	0.0410763
6	Control (embryo water)	Treatment	8	0.0487267
6	Control (embryo water)	Treatment	9	0.552878
6	Control (embryo water)	Treatment	10	0.891825
6	Control (embryo water)	Treatment	11	0.17395
6	Control (embryo water)	Treatment	12	0.154115
6	Control (embryo water)	Treatment	13	0.59864
6	Control (embryo water)	Treatment	14	0.367205
6	Control (embryo water)	Treatment	15	0.196927
6	Control (embryo water)	Treatment	16	0.685963
6	Control (embryo water)	Treatment	17	0.429197
6	Control (embryo water)	Treatment	18	0.0564152
6	Control (embryo water)	Treatment	19	0.0536853
6	Control (embryo water)	Treatment	20	0.0644637
7	Control (embryo water)	Baseline	0	0.940862
7	Control (embryo water)	Treatment	1	0.19687
7	Control (embryo water)	Treatment	2	0.133579
7	Control (embryo water)	Treatment	3	0.0405972
7	Control (embryo water)	Treatment	4	0.255285
7	Control (embryo water)	Treatment	5	0.346697
7	Control (embryo water)	Treatment	6	0.315895
7	Control (embryo water)	Treatment	7	0.27384
7	Control (embryo water)	Treatment	8	0.248745
7	Control (embryo water)	Treatment	9	0.39579
7	Control (embryo water)	Treatment	10	0.306993
7	Control (embryo water)	Treatment	11	0.439903
7	Control (embryo water)	Treatment	12	0.272573
7	Control (embryo water)	Treatment	13	0.333763
7	Control (embryo water)	Treatment	14	0.318293
7	Control (embryo water)	Treatment	15	0.380065
7	Control (embryo water)	Treatment	16	0.33121
7	Control (embryo water)	Treatment	17	0.367135
7	Control (embryo water)	Treatment	18	0.40908
7	Control (embryo water)	Treatment	19	0.482025
7	Control (embryo water)	Treatment	20	0.473582
8	Control (embryo water)	Baseline	0	0.260993
8	Control (embryo water)	Treatment	1	0.250292
8	Control (embryo water)	Treatment	2	0.256727
8	Control (embryo water)	Treatment	3	0.231523
8	Control (embryo water)	Treatment	4	0.254772
8	Control (embryo water)	Treatment	5	0.271812
8	Control (embryo water)	Treatment	6	0.217395
8	Control (embryo water)	Treatment	7	0.372857
8	Control (embryo water)	Treatment	8	0.21257
8	Control (embryo water)	Treatment	9	0.139951
8	Control (embryo water)	Treatment	10	0.26494
8	Control (embryo water)	Treatment	11	0.266085
8	Control (embryo water)	Treatment	12	0.221607
8	Control (embryo water)	Treatment	13	0.465732
8	Control (embryo water)	Treatment	14	0.281742
8	Control (embryo water)	Treatment	15	0.290478
8	Control (embryo water)	Treatment	16	0.279295
8	Control (embryo water)	Treatment	17	0.321647
8	Control (embryo water)	Treatment	18	0.303078
8	Control (embryo water)	Treatment	19	0.250403
8	Control (embryo water)	Treatment	20	0.289638
9	Control (embryo water)	Baseline	0	0.526507
9	Control (embryo water)	Treatment	1	0.128718
9	Control (embryo water)	Treatment	2	0.428608
9	Control (embryo water)	Treatment	3	0.366353
9	Control (embryo water)	Treatment	4	0.372053
9	Control (embryo water)	Treatment	5	0.368822
9	Control (embryo water)	Treatment	6	0.417535
9	Control (embryo water)	Treatment	7	0.452485
9	Control (embryo water)	Treatment	8	0.532567
9	Control (embryo water)	Treatment	9	0.390022
9	Control (embryo water)	Treatment	10	0.141596
9	Control (embryo water)	Treatment	11	0.191495
9	Control (embryo water)	Treatment	12	0.205747
9	Control (embryo water)	Treatment	13	0.41903
9	Control (embryo water)	Treatment	14	0.316265
9	Control (embryo water)	Treatment	15	0.292275
9	Control (embryo water)	Treatment	16	0.477972
9	Control (embryo water)	Treatment	17	0.42215
9	Control (embryo water)	Treatment	18	0.328263
9	Control (embryo water)	Treatment	19	0.53041
9	Control (embryo water)	Treatment	20	0.509905
10	Control (embryo water)	Baseline	0	0.596759
10	Control (embryo water)	Treatment	1	0.087526
10	Control (embryo water)	Treatment	2	0.057859
10	Control (embryo water)	Treatment	3	0.0407825
10	Control (embryo water)	Treatment	4	0.0429497
10	Control (embryo water)	Treatment	5	0.0465247
10	Control (embryo water)	Treatment	6	0.0430713
10	Control (embryo water)	Treatment	7	0.0395542
10	Control (embryo water)	Treatment	8	0.22746
10	Control (embryo water)	Treatment	9	0.284763
10	Control (embryo water)	Treatment	10	0.140183
10	Control (embryo water)	Treatment	11	0.0434847
10	Control (embryo water)	Treatment	12	0.153548
10	Control (embryo water)	Treatment	13	0.272788
10	Control (embryo water)	Treatment	14	0.72289
10	Control (embryo water)	Treatment	15	0.474823
10	Control (embryo water)	Treatment	16	0.480502
10	Control (embryo water)	Treatment	17	0.413078
10	Control (embryo water)	Treatment	18	0.89211
10	Control (embryo water)	Treatment	19	0.770777
10	Control (embryo water)	Treatment	20	0.882373
11	Control (embryo water)	Baseline	0	0.406077
11	Control (embryo water)	Treatment	1	0.497252
11	Control (embryo water)	Treatment	2	0.717045
11	Control (embryo water)	Treatment	3	0.583923
11	Control (embryo water)	Treatment	4	1.12747
11	Control (embryo water)	Treatment	5	1.5678
11	Control (embryo water)	Treatment	6	2.05737
11	Control (embryo water)	Treatment	7	0.845555
11	Control (embryo water)	Treatment	8	0.33589
11	Control (embryo water)	Treatment	9	0.236688
11	Control (embryo water)	Treatment	10	0.2075
11	Control (embryo water)	Treatment	11	0.153897
11	Control (embryo water)	Treatment	12	0.0883137
11	Control (embryo water)	Treatment	13	0.202142
11	Control (embryo water)	Treatment	14	0.244873
11	Control (embryo water)	Treatment	15	0.35478
11	Control (embryo water)	Treatment	16	0.247213
11	Control (embryo water)	Treatment	17	0.184878
11	Control (embryo water)	Treatment	18	0.196747
11	Control (embryo water)	Treatment	19	0.24241
11	Control (embryo water)	Treatment	20	0.215322
12	Control (embryo water)	Baseline	0	0.181805
12	Control (embryo water)	Treatment	1	0.420788
12	Control (embryo water)	Treatment	2	0.210743
12	Control (embryo water)	Treatment	3	0.368358
12	Control (embryo water)	Treatment	4	0.159097
12	Control (embryo water)	Treatment	5	0.401717
12	Control (embryo water)	Treatment	6	0.412497
12	Control (embryo water)	Treatment	7	0.498342
12	Control (embryo water)	Treatment	8	0.28135
12	Control (embryo water)	Treatment	9	0.252983
12	Control (embryo water)	Treatment	10	0.369857
12	Control (embryo water)	Treatment	11	0.521282
12	Control (embryo water)	Treatment	12	0.398278
12	Control (embryo water)	Treatment	13	0.350333
12	Control (embryo water)	Treatment	14	0.27107
12	Control (embryo water)	Treatment	15	0.276997
12	Control (embryo water)	Treatment	16	0.281172
12	Control (embryo water)	Treatment	17	0.147701
12	Control (embryo water)	Treatment	18	0.502425
12	Control (embryo water)	Treatment	19	0.395928
12	Control (embryo water)	Treatment	20	0.209245
13	Control (embryo water)	Baseline	0	0.864791
13	Control (embryo water)	Treatment	1	0.693277
13	Control (embryo water)	Treatment	2	1.6517
13	Control (embryo water)	Treatment	3	1.53481
13	Control (embryo water)	Treatment	4	1.96595
13	Control (embryo water)	Treatment	5	2.19183
13	Control (embryo water)	Treatment	6	1.9785
13	Control (embryo water)	Treatment	7	2.36585
13	Control (embryo water)	Treatment	8	0.216602
13	Control (embryo water)	Treatment	9	0.135345
13	Control (embryo water)	Treatment	10	0.174103
13	Control (embryo water)	Treatment	11	0.611127
13	Control (embryo water)	Treatment	12	1.18016
13	Control (embryo water)	Treatment	13	0.320857
13	Control (embryo water)	Treatment	14	0.159297
13	Control (embryo water)	Treatment	15	0.272767
13	Control (embryo water)	Treatment	16	0.230878
13	Control (embryo water)	Treatment	17	0.93962
13	Control (embryo water)	Treatment	18	1.14839
13	Control (embryo water)	Treatment	19	1.47681
13	Control (embryo water)	Treatment	20	2.28575
14	Control (embryo water)	Baseline	0	0.271959
14	Control (embryo water)	Treatment	1	0.276907
14	Control (embryo water)	Treatment	2	0.193208
14	Control (embryo water)	Treatment	3	0.331477
14	Control (embryo water)	Treatment	4	0.314105
14	Control (embryo water)	Treatment	5	0.370538
14	Control (embryo water)	Treatment	6	0.132174
14	Control (embryo water)	Treatment	7	0.473188
14	Control (embryo water)	Treatment	8	0.290597
14	Control (embryo water)	Treatment	9	0.245198
14	Control (embryo water)	Treatment	10	0.331655
14	Control (embryo water)	Treatment	11	0.253402
14	Control (embryo water)	Treatment	12	0.472335
14	Control (embryo water)	Treatment	13	0.412065
14	Control (embryo water)	Treatment	14	0.734807
14	Control (embryo water)	Treatment	15	0.368175
14	Control (embryo water)	Treatment	16	0.759888
14	Control (embryo water)	Treatment	17	0.374132
14	Control (embryo water)	Treatment	18	0.331733
14	Control (embryo water)	Treatment	19	0.354375
14	Control (embryo water)	Treatment	20	0.301482
15	Control (embryo water)	Baseline	0	0.523166
15	Control (embryo water)	Treatment	1	0.336573
15	Control (embryo water)	Treatment	2	0.103931
15	Control (embryo water)	Treatment	3	0.526442
15	Control (embryo water)	Treatment	4	0.66229
15	Control (embryo water)	Treatment	5	0.418193
15	Control (embryo water)	Treatment	6	0.25478
15	Control (embryo water)	Treatment	7	0.509038
15	Control (embryo water)	Treatment	8	0.277693
15	Control (embryo water)	Treatment	9	0.548872
15	Control (embryo water)	Treatment	10	0.556512
15	Control (embryo water)	Treatment	11	0.573247
15	Control (embryo water)	Treatment	12	0.196448
15	Control (embryo water)	Treatment	13	0.500457
15	Control (embryo water)	Treatment	14	0.496283
15	Control (embryo water)	Treatment	15	0.279252
15	Control (embryo water)	Treatment	16	0.510055
15	Control (embryo water)	Treatment	17	0.283007
15	Control (embryo water)	Treatment	18	0.26568
15	Control (embryo water)	Treatment	19	0.121679
15	Control (embryo water)	Treatment	20	0.12954
16	Control (embryo water)	Baseline	0	0.739832
16	Control (embryo water)	Treatment	1	0.495287
16	Control (embryo water)	Treatment	2	0.260252
16	Control (embryo water)	Treatment	3	0.407707
16	Control (embryo water)	Treatment	4	0.341228
16	Control (embryo water)	Treatment	5	0.5209
16	Control (embryo water)	Treatment	6	0.433462
16	Control (embryo water)	Treatment	7	0.486128
16	Control (embryo water)	Treatment	8	0.46619
16	Control (embryo water)	Treatment	9	0.308388
16	Control (embryo water)	Treatment	10	0.285302
16	Control (embryo water)	Treatment	11	0.179158
16	Control (embryo water)	Treatment	12	0.319567
16	Control (embryo water)	Treatment	13	0.28006
16	Control (embryo water)	Treatment	14	0.0545148
16	Control (embryo water)	Treatment	15
16	Control (embryo water)	Treatment	16
16	Control (embryo water)	Treatment	17
16	Control (embryo water)	Treatment	18
16	Control (embryo water)	Treatment	19
16	Control (embryo water)	Treatment	20
17	Control (embryo water)	Baseline	0	0.561347
17	Control (embryo water)	Treatment	1	0.828023
17	Control (embryo water)	Treatment	2	1.10631
17	Control (embryo water)	Treatment	3	0.96133
17	Control (embryo water)	Treatment	4	1.73663
17	Control (embryo water)	Treatment	5	1.05723
17	Control (embryo water)	Treatment	6	0.76165
17	Control (embryo water)	Treatment	7	1.1222
17	Control (embryo water)	Treatment	8	1.70027
17	Control (embryo water)	Treatment	9	1.24026
17	Control (embryo water)	Treatment	10	0.358177
17	Control (embryo water)	Treatment	11	0.956842
17	Control (embryo water)	Treatment	12	0.817605
17	Control (embryo water)	Treatment	13	0.751343
17	Control (embryo water)	Treatment	14	0.249
17	Control (embryo water)	Treatment	15
17	Control (embryo water)	Treatment	16
17	Control (embryo water)	Treatment	17
17	Control (embryo water)	Treatment	18
17	Control (embryo water)	Treatment	19
17	Control (embryo water)	Treatment	20
18	Control (embryo water)	Baseline	0	0.178143
18	Control (embryo water)	Treatment	1	0.190578
18	Control (embryo water)	Treatment	2	0.0569675
18	Control (embryo water)	Treatment	3	0.111986
18	Control (embryo water)	Treatment	4	0.0866253
18	Control (embryo water)	Treatment	5	0.126244
18	Control (embryo water)	Treatment	6	0.0681245
18	Control (embryo water)	Treatment	7	0.0445145
18	Control (embryo water)	Treatment	8	0.080186
18	Control (embryo water)	Treatment	9	0.0741827
18	Control (embryo water)	Treatment	10	0.0443475
18	Control (embryo water)	Treatment	11	0.0685887
18	Control (embryo water)	Treatment	12	0.0525522
18	Control (embryo water)	Treatment	13	0.0651515
18	Control (embryo water)	Treatment	14	0.0389922
18	Control (embryo water)	Treatment	15
18	Control (embryo water)	Treatment	16
18	Control (embryo water)	Treatment	17
18	Control (embryo water)	Treatment	18
18	Control (embryo water)	Treatment	19
18	Control (embryo water)	Treatment	20
19	Control (embryo water)	Baseline	0	0.243311
19	Control (embryo water)	Treatment	1	1.02983
19	Control (embryo water)	Treatment	2	0.716348
19	Control (embryo water)	Treatment	3	0.406382
19	Control (embryo water)	Treatment	4	0.387012
19	Control (embryo water)	Treatment	5	0.293598
19	Control (embryo water)	Treatment	6	0.402163
19	Control (embryo water)	Treatment	7	1.13443
19	Control (embryo water)	Treatment	8	0.332785
19	Control (embryo water)	Treatment	9	0.535462
19	Control (embryo water)	Treatment	10	0.797695
19	Control (embryo water)	Treatment	11	1.3052
19	Control (embryo water)	Treatment	12	0.912307
19	Control (embryo water)	Treatment	13	0.666125
19	Control (embryo water)	Treatment	14	0.746415
19	Control (embryo water)	Treatment	15
19	Control (embryo water)	Treatment	16
19	Control (embryo water)	Treatment	17
19	Control (embryo water)	Treatment	18
19	Control (embryo water)	Treatment	19
19	Control (embryo water)	Treatment	20
20	Control (embryo water)	Baseline	0	0.628787
20	Control (embryo water)	Treatment	1	0.86327
20	Control (embryo water)	Treatment	2	0.782278
20	Control (embryo water)	Treatment	3	0.852038
20	Control (embryo water)	Treatment	4	0.869437
20	Control (embryo water)	Treatment	5	0.45162
20	Control (embryo water)	Treatment	6	0.758137
20	Control (embryo water)	Treatment	7	0.61384
20	Control (embryo water)	Treatment	8	0.601152
20	Control (embryo water)	Treatment	9	0.418957
20	Control (embryo water)	Treatment	10	0.17936
20	Control (embryo water)	Treatment	11	0.238008
20	Control (embryo water)	Treatment	12	0.290743
20	Control (embryo water)	Treatment	13	0.145226
20	Control (embryo water)	Treatment	14	0.123541
20	Control (embryo water)	Treatment	15
20	Control (embryo water)	Treatment	16
20	Control (embryo water)	Treatment	17
20	Control (embryo water)	Treatment	18
20	Control (embryo water)	Treatment	19
20	Control (embryo water)	Treatment	20
21	Control (embryo water)	Baseline	0	0.507775
21	Control (embryo water)	Treatment	1	0.407682
21	Control (embryo water)	Treatment	2	0.337168
21	Control (embryo water)	Treatment	3	0.596477
21	Control (embryo water)	Treatment	4	0.380273
21	Control (embryo water)	Treatment	5	0.446177
21	Control (embryo water)	Treatment	6	0.395062
21	Control (embryo water)	Treatment	7	1.06676
21	Control (embryo water)	Treatment	8	1.17081
21	Control (embryo water)	Treatment	9	1.87047
21	Control (embryo water)	Treatment	10	0.59479
21	Control (embryo water)	Treatment	11	0.115541
21	Control (embryo water)	Treatment	12	0.167357
21	Control (embryo water)	Treatment	13
21	Control (embryo water)	Treatment	14
21	Control (embryo water)	Treatment	15
21	Control (embryo water)	Treatment	16
21	Control (embryo water)	Treatment	17
21	Control (embryo water)	Treatment	18
21	Control (embryo water)	Treatment	19
21	Control (embryo water)	Treatment	20
22	Control (embryo water)	Baseline	0	0.3252
22	Control (embryo water)	Treatment	1	0.0416635
22	Control (embryo water)	Treatment	2	0.162197
22	Control (embryo water)	Treatment	3	0.0505617
22	Control (embryo water)	Treatment	4	0.0436665
22	Control (embryo water)	Treatment	5	0.00565818
22	Control (embryo water)	Treatment	6	0.0241483
22	Control (embryo water)	Treatment	7	0.00873155
22	Control (embryo water)	Treatment	8	0
22	Control (embryo water)	Treatment	9	0.093064
22	Control (embryo water)	Treatment	10	0.128678
22	Control (embryo water)	Treatment	11	0.128605
22	Control (embryo water)	Treatment	12	0.239638
22	Control (embryo water)	Treatment	13
22	Control (embryo water)	Treatment	14
22	Control (embryo water)	Treatment	15
22	Control (embryo water)	Treatment	16
22	Control (embryo water)	Treatment	17
22	Control (embryo water)	Treatment	18
22	Control (embryo water)	Treatment	19
22	Control (embryo water)	Treatment	20
23	Control (embryo water)	Baseline	0	0.956088
23	Control (embryo water)	Treatment	1	1.62448
23	Control (embryo water)	Treatment	2	0.860792
23	Control (embryo water)	Treatment	3	0.526523
23	Control (embryo water)	Treatment	4	0.660052
23	Control (embryo water)	Treatment	5	0.936742
23	Control (embryo water)	Treatment	6	1.10947
23	Control (embryo water)	Treatment	7	0.29643
23	Control (embryo water)	Treatment	8	0.741418
23	Control (embryo water)	Treatment	9	1.20903
23	Control (embryo water)	Treatment	10	1.40419
23	Control (embryo water)	Treatment	11	1.56474
23	Control (embryo water)	Treatment	12	3.30363
23	Control (embryo water)	Treatment	13
23	Control (embryo water)	Treatment	14
23	Control (embryo water)	Treatment	15
23	Control (embryo water)	Treatment	16
23	Control (embryo water)	Treatment	17
23	Control (embryo water)	Treatment	18
23	Control (embryo water)	Treatment	19
23	Control (embryo water)	Treatment	20
24	0.05% formalin	Baseline	0	0.101841
24	0.05% formalin	Treatment	1	2.88523
24	0.05% formalin	Treatment	2	2.06152
24	0.05% formalin	Treatment	3	1.13781
24	0.05% formalin	Treatment	4	0.453335
24	0.05% formalin	Treatment	5	0.37418
24	0.05% formalin	Treatment	6	0.22304
24	0.05% formalin	Treatment	7	0.260823
24	0.05% formalin	Treatment	8	0.45566
24	0.05% formalin	Treatment	9	0.241788
24	0.05% formalin	Treatment	10	0.0354443
24	0.05% formalin	Treatment	11	0.0377913
24	0.05% formalin	Treatment	12	0.197282
24	0.05% formalin	Treatment	13	0.116431
24	0.05% formalin	Treatment	14	0.049021
24	0.05% formalin	Treatment	15	0.0286165
24	0.05% formalin	Treatment	16	0.048282
24	0.05% formalin	Treatment	17	0.0516803
24	0.05% formalin	Treatment	18	0.0614185
24	0.05% formalin	Treatment	19	0.0392973
24	0.05% formalin	Treatment	20	0.0402283
25	0.05% formalin	Baseline	0	0.101841
25	0.05% formalin	Treatment	1	3.07562
25	0.05% formalin	Treatment	2	4.42417
25	0.05% formalin	Treatment	3	4.60085
25	0.05% formalin	Treatment	4	2.63602
25	0.05% formalin	Treatment	5	2.47647
25	0.05% formalin	Treatment	6	1.3996
25	0.05% formalin	Treatment	7	1.12143
25	0.05% formalin	Treatment	8	0.733627
25	0.05% formalin	Treatment	9	0.77729
25	0.05% formalin	Treatment	10	1.02147
25	0.05% formalin	Treatment	11	0.711213
25	0.05% formalin	Treatment	12	0.20049
25	0.05% formalin	Treatment	13	0.342955
25	0.05% formalin	Treatment	14	0.379485
25	0.05% formalin	Treatment	15	0.334848
25	0.05% formalin	Treatment	16	0.0522517
25	0.05% formalin	Treatment	17	0.0509248
25	0.05% formalin	Treatment	18	0.062498
25	0.05% formalin	Treatment	19	0.0341528
25	0.05% formalin	Treatment	20	0.0376362
26	0.05% formalin	Baseline	0	0.282726
26	0.05% formalin	Treatment	1	3.84348
26	0.05% formalin	Treatment	2	3.07887
26	0.05% formalin	Treatment	3	1.94792
26	0.05% formalin	Treatment	4	1.96883
26	0.05% formalin	Treatment	5	0.756617
26	0.05% formalin	Treatment	6	0.229283
26	0.05% formalin	Treatment	7	0.362368
26	0.05% formalin	Treatment	8	0.35488
26	0.05% formalin	Treatment	9	0.270548
26	0.05% formalin	Treatment	10	0.153102
26	0.05% formalin	Treatment	11	0.14962
26	0.05% formalin	Treatment	12	0.323738
26	0.05% formalin	Treatment	13	0.394095
26	0.05% formalin	Treatment	14	0.37853
26	0.05% formalin	Treatment	15	0.317292
26	0.05% formalin	Treatment	16	0.211922
26	0.05% formalin	Treatment	17	0.235418
26	0.05% formalin	Treatment	18	0.159925
26	0.05% formalin	Treatment	19	0.0535433
26	0.05% formalin	Treatment	20	0.0407875
27	0.05% formalin	Baseline	0	0.278009
27	0.05% formalin	Treatment	1	2.65765
27	0.05% formalin	Treatment	2	2.64508
27	0.05% formalin	Treatment	3	2.86837
27	0.05% formalin	Treatment	4	2.16583
27	0.05% formalin	Treatment	5	1.62829
27	0.05% formalin	Treatment	6	0.645197
27	0.05% formalin	Treatment	7	0.465432
27	0.05% formalin	Treatment	8	0.395037
27	0.05% formalin	Treatment	9	0.301155
27	0.05% formalin	Treatment	10	0.79832
27	0.05% formalin	Treatment	11	0.370365
27	0.05% formalin	Treatment	12	0.435547
27	0.05% formalin	Treatment	13	0.32541
27	0.05% formalin	Treatment	14	0.388898
27	0.05% formalin	Treatment	15	0.0993853
27	0.05% formalin	Treatment	16	0.142013
27	0.05% formalin	Treatment	17	0.062808
27	0.05% formalin	Treatment	18	0.0687453
27	0.05% formalin	Treatment	19	0.107819
27	0.05% formalin	Treatment	20	0.0470345
28	0.05% formalin	Baseline	0	0.0848265
28	0.05% formalin	Treatment	1	2.20293
28	0.05% formalin	Treatment	2	2.6423
28	0.05% formalin	Treatment	3	2.67477
28	0.05% formalin	Treatment	4	2.29982
28	0.05% formalin	Treatment	5	1.65129
28	0.05% formalin	Treatment	6	1.59485
28	0.05% formalin	Treatment	7	0.757243
28	0.05% formalin	Treatment	8	0.494948
28	0.05% formalin	Treatment	9	0.46638
28	0.05% formalin	Treatment	10	0.567352
28	0.05% formalin	Treatment	11	0.528932
28	0.05% formalin	Treatment	12	0.08664
28	0.05% formalin	Treatment	13	0.0435367
28	0.05% formalin	Treatment	14	0.0957272
28	0.05% formalin	Treatment	15	0.193542
28	0.05% formalin	Treatment	16	0.113401
28	0.05% formalin	Treatment	17	0.0798967
28	0.05% formalin	Treatment	18	0.0634
28	0.05% formalin	Treatment	19	0.0499892
28	0.05% formalin	Treatment	20	0.0348438
29	0.05% formalin	Baseline	0	0.992983
29	0.05% formalin	Treatment	1	1.54274
29	0.05% formalin	Treatment	2	4.94672
29	0.05% formalin	Treatment	3	2.9995
29	0.05% formalin	Treatment	4	0.665552
29	0.05% formalin	Treatment	5	0.122989
29	0.05% formalin	Treatment	6	0.387463
29	0.05% formalin	Treatment	7	0.633725
29	0.05% formalin	Treatment	8	0.60838
29	0.05% formalin	Treatment	9	0.445303
29	0.05% formalin	Treatment	10	0.266738
29	0.05% formalin	Treatment	11	0.0983923
29	0.05% formalin	Treatment	12	0.0627825
29	0.05% formalin	Treatment	13	0.0928403
29	0.05% formalin	Treatment	14	0.0542555
29	0.05% formalin	Treatment	15	0.12118
29	0.05% formalin	Treatment	16	0.11143
29	0.05% formalin	Treatment	17	0.0310723
29	0.05% formalin	Treatment	18	0.144902
29	0.05% formalin	Treatment	19	0.0954673
29	0.05% formalin	Treatment	20	0.0509632
30	0.05% formalin	Baseline	0	0.772588
30	0.05% formalin	Treatment	1	1.24292
30	0.05% formalin	Treatment	2	0.68171
30	0.05% formalin	Treatment	3	0.38294
30	0.05% formalin	Treatment	4	0.580707
30	0.05% formalin	Treatment	5	0.560958
30	0.05% formalin	Treatment	6	0.0753208
30	0.05% formalin	Treatment	7	0.0182062
30	0.05% formalin	Treatment	8	0.0227928
30	0.05% formalin	Treatment	9	0.0204657
30	0.05% formalin	Treatment	10	0.0371018
30	0.05% formalin	Treatment	11	0.0267127
30	0.05% formalin	Treatment	12	0.025768
30	0.05% formalin	Treatment	13	0.0173642
30	0.05% formalin	Treatment	14	0.036514
30	0.05% formalin	Treatment	15	0.0455883
30	0.05% formalin	Treatment	16	0.0452143
30	0.05% formalin	Treatment	17	0.0447353
30	0.05% formalin	Treatment	18	0.0325397
30	0.05% formalin	Treatment	19	0.0219078
30	0.05% formalin	Treatment	20	0.0304175
31	0.05% formalin	Baseline	0	0.13197
31	0.05% formalin	Treatment	1	1.3752
31	0.05% formalin	Treatment	2	0.39637
31	0.05% formalin	Treatment	3	0.366298
31	0.05% formalin	Treatment	4	0.0626055
31	0.05% formalin	Treatment	5	0.065863
31	0.05% formalin	Treatment	6	0.0369873
31	0.05% formalin	Treatment	7	0.313902
31	0.05% formalin	Treatment	8	0.0266005
31	0.05% formalin	Treatment	9	0.021705
31	0.05% formalin	Treatment	10	0.0252965
31	0.05% formalin	Treatment	11	0.0754332
31	0.05% formalin	Treatment	12	0.0249423
31	0.05% formalin	Treatment	13	0.0703273
31	0.05% formalin	Treatment	14	0.0432547
31	0.05% formalin	Treatment	15	0.0557353
31	0.05% formalin	Treatment	16	0.069075
31	0.05% formalin	Treatment	17	0.0652163
31	0.05% formalin	Treatment	18	0.0362265
31	0.05% formalin	Treatment	19	0.0375675
31	0.05% formalin	Treatment	20	0.106337
32	0.05% formalin	Baseline	0	0.592738
32	0.05% formalin	Treatment	1	2.79408
32	0.05% formalin	Treatment	2	1.75127
32	0.05% formalin	Treatment	3	1.03212
32	0.05% formalin	Treatment	4	0.553475
32	0.05% formalin	Treatment	5	0.737615
32	0.05% formalin	Treatment	6	0.644405
32	0.05% formalin	Treatment	7	0.57055
32	0.05% formalin	Treatment	8	0.141247
32	0.05% formalin	Treatment	9	0.0393188
32	0.05% formalin	Treatment	10	0.0363392
32	0.05% formalin	Treatment	11	0.0348322
32	0.05% formalin	Treatment	12	0.0246755
32	0.05% formalin	Treatment	13	0.0331912
32	0.05% formalin	Treatment	14	0.0470542
32	0.05% formalin	Treatment	15	0.0515795
32	0.05% formalin	Treatment	16	0.0486557
32	0.05% formalin	Treatment	17	0.0476377
32	0.05% formalin	Treatment	18	0.0246747
32	0.05% formalin	Treatment	19	0.0243757
32	0.05% formalin	Treatment	20	0.022864
33	0.05% formalin	Baseline	0	0.637352
33	0.05% formalin	Treatment	1	4.72123
33	0.05% formalin	Treatment	2	2.74642
33	0.05% formalin	Treatment	3	1.43849
33	0.05% formalin	Treatment	4	1.09488
33	0.05% formalin	Treatment	5	0.88417
33	0.05% formalin	Treatment	6	1.12228
33	0.05% formalin	Treatment	7	1.0262
33	0.05% formalin	Treatment	8	0.511097
33	0.05% formalin	Treatment	9	0.522932
33	0.05% formalin	Treatment	10	0.677715
33	0.05% formalin	Treatment	11	0.442093
33	0.05% formalin	Treatment	12	0.59131
33	0.05% formalin	Treatment	13	0.546005
33	0.05% formalin	Treatment	14	1.03687
33	0.05% formalin	Treatment	15	0.55337
33	0.05% formalin	Treatment	16	0.33534
33	0.05% formalin	Treatment	17	0.371403
33	0.05% formalin	Treatment	18	0.435688
33	0.05% formalin	Treatment	19	0.193618
33	0.05% formalin	Treatment	20	0.102405
34	0.05% formalin	Baseline	0	0.351893
34	0.05% formalin	Treatment	1	3.42188
34	0.05% formalin	Treatment	2	3.84082
34	0.05% formalin	Treatment	3	2.12033
34	0.05% formalin	Treatment	4	2.07598
34	0.05% formalin	Treatment	5	1.74772
34	0.05% formalin	Treatment	6	1.60421
34	0.05% formalin	Treatment	7	1.48101
34	0.05% formalin	Treatment	8	1.113
34	0.05% formalin	Treatment	9	1.3525
34	0.05% formalin	Treatment	10	1.25571
34	0.05% formalin	Treatment	11	0.822393
34	0.05% formalin	Treatment	12	0.590422
34	0.05% formalin	Treatment	13	0.199877
34	0.05% formalin	Treatment	14	0.0422032
34	0.05% formalin	Treatment	15	0.047885
34	0.05% formalin	Treatment	16	0.0448485
34	0.05% formalin	Treatment	17	0.0445802
34	0.05% formalin	Treatment	18	0.0362197
34	0.05% formalin	Treatment	19	0.0441942
34	0.05% formalin	Treatment	20	0.0373923
35	0.05% formalin	Baseline	0	1.32574
35	0.05% formalin	Treatment	1	3.73992
35	0.05% formalin	Treatment	2	2.5169
35	0.05% formalin	Treatment	3	1.90668
35	0.05% formalin	Treatment	4	1.9405
35	0.05% formalin	Treatment	5	1.88823
35	0.05% formalin	Treatment	6	1.70278
35	0.05% formalin	Treatment	7	1.12807
35	0.05% formalin	Treatment	8	1.34897
35	0.05% formalin	Treatment	9	1.71222
35	0.05% formalin	Treatment	10	1.8544
35	0.05% formalin	Treatment	11	1.39004
35	0.05% formalin	Treatment	12	1.30432
35	0.05% formalin	Treatment	13	0.77504
35	0.05% formalin	Treatment	14	0.389337
35	0.05% formalin	Treatment	15	0.341072
35	0.05% formalin	Treatment	16	0.0736422
35	0.05% formalin	Treatment	17	0.0477343
35	0.05% formalin	Treatment	18	0.0885452
35	0.05% formalin	Treatment	19	0.20005
35	0.05% formalin	Treatment	20	0.198882
36	0.05% formalin	Baseline	0	0.692806
36	0.05% formalin	Treatment	1	3.41717
36	0.05% formalin	Treatment	2	4.18985
36	0.05% formalin	Treatment	3	4.13357
36	0.05% formalin	Treatment	4	3.20655
36	0.05% formalin	Treatment	5	2.85385
36	0.05% formalin	Treatment	6	2.51323
36	0.05% formalin	Treatment	7	1.99535
36	0.05% formalin	Treatment	8	1.96922
36	0.05% formalin	Treatment	9	1.7328
36	0.05% formalin	Treatment	10	0.814395
36	0.05% formalin	Treatment	11	0.373017
36	0.05% formalin	Treatment	12	0.150889
36	0.05% formalin	Treatment	13
36	0.05% formalin	Treatment	14
36	0.05% formalin	Treatment	15
36	0.05% formalin	Treatment	16
36	0.05% formalin	Treatment	17
36	0.05% formalin	Treatment	18
36	0.05% formalin	Treatment	19
36	0.05% formalin	Treatment	20
37	0.05% formalin	Baseline	0	1.65556
37	0.05% formalin	Treatment	1	2.58007
37	0.05% formalin	Treatment	2	3.21777
37	0.05% formalin	Treatment	3	1.40813
37	0.05% formalin	Treatment	4	0.871613
37	0.05% formalin	Treatment	5	0.0226882
37	0.05% formalin	Treatment	6	0.0962133
37	0.05% formalin	Treatment	7	0.0249515
37	0.05% formalin	Treatment	8	0.337993
37	0.05% formalin	Treatment	9	0.067134
37	0.05% formalin	Treatment	10	0.200172
37	0.05% formalin	Treatment	11	0.0221813
37	0.05% formalin	Treatment	12	0.0212425
37	0.05% formalin	Treatment	13
37	0.05% formalin	Treatment	14
37	0.05% formalin	Treatment	15
37	0.05% formalin	Treatment	16
37	0.05% formalin	Treatment	17
37	0.05% formalin	Treatment	18
37	0.05% formalin	Treatment	19
37	0.05% formalin	Treatment	20
38	0.05% formalin	Baseline	0	0.315592
38	0.05% formalin	Treatment	1	2.53913
38	0.05% formalin	Treatment	2	1.7166
38	0.05% formalin	Treatment	3	1.3835
38	0.05% formalin	Treatment	4	0.475817
38	0.05% formalin	Treatment	5	0.020839
38	0.05% formalin	Treatment	6	0.0241887
38	0.05% formalin	Treatment	7	0.19432
38	0.05% formalin	Treatment	8	0.587397
38	0.05% formalin	Treatment	9	0.039054
38	0.05% formalin	Treatment	10	0.239712
38	0.05% formalin	Treatment	11	0.0356642
38	0.05% formalin	Treatment	12	0.123898
38	0.05% formalin	Treatment	13
38	0.05% formalin	Treatment	14
38	0.05% formalin	Treatment	15
38	0.05% formalin	Treatment	16
38	0.05% formalin	Treatment	17
38	0.05% formalin	Treatment	18
38	0.05% formalin	Treatment	19
38	0.05% formalin	Treatment	20
39	0.05% formalin	Baseline	0	1.02038
39	0.05% formalin	Treatment	1	1.77008
39	0.05% formalin	Treatment	2	3.40877
39	0.05% formalin	Treatment	3	2.99977
39	0.05% formalin	Treatment	4	0.981505
39	0.05% formalin	Treatment	5	0.307885
39	0.05% formalin	Treatment	6	0.414203
39	0.05% formalin	Treatment	7	0.458195
39	0.05% formalin	Treatment	8	0.816117
39	0.05% formalin	Treatment	9	0.734525
39	0.05% formalin	Treatment	10	0.51515
39	0.05% formalin	Treatment	11	0.330308
39	0.05% formalin	Treatment	12	0.164754
39	0.05% formalin	Treatment	13
39	0.05% formalin	Treatment	14
39	0.05% formalin	Treatment	15
39	0.05% formalin	Treatment	16
39	0.05% formalin	Treatment	17
39	0.05% formalin	Treatment	18
39	0.05% formalin	Treatment	19
39	0.05% formalin	Treatment	20
40	0.05% formalin	Baseline	0	0.70009
40	0.05% formalin	Treatment	1	1.72107
40	0.05% formalin	Treatment	2	2.18465
40	0.05% formalin	Treatment	3	2.36635
40	0.05% formalin	Treatment	4	2.61513
40	0.05% formalin	Treatment	5	2.7571
40	0.05% formalin	Treatment	6	2.94547
40	0.05% formalin	Treatment	7	3.05585
40	0.05% formalin	Treatment	8	1.86682
40	0.05% formalin	Treatment	9	0.931547
40	0.05% formalin	Treatment	10	0.312865
40	0.05% formalin	Treatment	11	0.717232
40	0.05% formalin	Treatment	12	0.504285
40	0.05% formalin	Treatment	13
40	0.05% formalin	Treatment	14
40	0.05% formalin	Treatment	15
40	0.05% formalin	Treatment	16
40	0.05% formalin	Treatment	17
40	0.05% formalin	Treatment	18
40	0.05% formalin	Treatment	19
40	0.05% formalin	Treatment	20
41	0.05% formalin	Baseline	0	0.716737
41	0.05% formalin	Treatment	1	2.0415
41	0.05% formalin	Treatment	2	3.39787
41	0.05% formalin	Treatment	3	2.25863
41	0.05% formalin	Treatment	4	2.21933
41	0.05% formalin	Treatment	5	0.564762
41	0.05% formalin	Treatment	6	0.87226
41	0.05% formalin	Treatment	7	0.712383
41	0.05% formalin	Treatment	8	0.288805
41	0.05% formalin	Treatment	9	0.662162
41	0.05% formalin	Treatment	10	0.036571
41	0.05% formalin	Treatment	11	0.0397598
41	0.05% formalin	Treatment	12	0.0345257
41	0.05% formalin	Treatment	13
41	0.05% formalin	Treatment	14
41	0.05% formalin	Treatment	15
41	0.05% formalin	Treatment	16
41	0.05% formalin	Treatment	17
41	0.05% formalin	Treatment	18
41	0.05% formalin	Treatment	19
41	0.05% formalin	Treatment	20
42	0.05% formalin	Baseline	0	0.901034
42	0.05% formalin	Treatment	1	1.55388
42	0.05% formalin	Treatment	2	1.26046
42	0.05% formalin	Treatment	3	1.09657
42	0.05% formalin	Treatment	4	0.995402
42	0.05% formalin	Treatment	5	1.46292
42	0.05% formalin	Treatment	6	2.5979
42	0.05% formalin	Treatment	7	2.1772
42	0.05% formalin	Treatment	8	2.10572
42	0.05% formalin	Treatment	9	2.02802
42	0.05% formalin	Treatment	10	1.13058
42	0.05% formalin	Treatment	11	0.756112
42	0.05% formalin	Treatment	12	0.34972
42	0.05% formalin	Treatment	13
42	0.05% formalin	Treatment	14
42	0.05% formalin	Treatment	15
42	0.05% formalin	Treatment	16
42	0.05% formalin	Treatment	17
42	0.05% formalin	Treatment	18
42	0.05% formalin	Treatment	19
42	0.05% formalin	Treatment	20
43	0.05% formalin	Baseline	0	0.315645
43	0.05% formalin	Treatment	1	3.42438
43	0.05% formalin	Treatment	2	3.4365
43	0.05% formalin	Treatment	3	2.91622
43	0.05% formalin	Treatment	4	1.00445
43	0.05% formalin	Treatment	5	0.411055
43	0.05% formalin	Treatment	6	0.3689
43	0.05% formalin	Treatment	7	0.3085
43	0.05% formalin	Treatment	8	0.259113
43	0.05% formalin	Treatment	9	0.484457
43	0.05% formalin	Treatment	10	0.506322
43	0.05% formalin	Treatment	11	0.235812
43	0.05% formalin	Treatment	12	0.130384
43	0.05% formalin	Treatment	13
43	0.05% formalin	Treatment	14
43	0.05% formalin	Treatment	15
43	0.05% formalin	Treatment	16
43	0.05% formalin	Treatment	17
43	0.05% formalin	Treatment	18
43	0.05% formalin	Treatment	19
43	0.05% formalin	Treatment	20
44	0.05% formalin	Baseline	0	0.739832
44	0.05% formalin	Treatment	1	0.498993
44	0.05% formalin	Treatment	2	0.237577
44	0.05% formalin	Treatment	3	1.06804
44	0.05% formalin	Treatment	4	1.19053
44	0.05% formalin	Treatment	5	1.39729
44	0.05% formalin	Treatment	6	1.99475
44	0.05% formalin	Treatment	7	1.34809
44	0.05% formalin	Treatment	8	0.773233
44	0.05% formalin	Treatment	9	0.48186
44	0.05% formalin	Treatment	10	0.195522
44	0.05% formalin	Treatment	11	0.022186
44	0.05% formalin	Treatment	12	0.0485518
44	0.05% formalin	Treatment	13
44	0.05% formalin	Treatment	14
44	0.05% formalin	Treatment	15
44	0.05% formalin	Treatment	16
44	0.05% formalin	Treatment	17
44	0.05% formalin	Treatment	18
44	0.05% formalin	Treatment	19
44	0.05% formalin	Treatment	20
45	0.05% formalin	Baseline	0	0.561347
45	0.05% formalin	Treatment	1	2.26832
45	0.05% formalin	Treatment	2	3.10113
45	0.05% formalin	Treatment	3	1.85927
45	0.05% formalin	Treatment	4	2.06518
45	0.05% formalin	Treatment	5	1.10822
45	0.05% formalin	Treatment	6	0.948052
45	0.05% formalin	Treatment	7	0.966202
45	0.05% formalin	Treatment	8	0.935582
45	0.05% formalin	Treatment	9	1.63865
45	0.05% formalin	Treatment	10	0.136846
45	0.05% formalin	Treatment	11	0.0420227
45	0.05% formalin	Treatment	12	0.0630537
45	0.05% formalin	Treatment	13
45	0.05% formalin	Treatment	14
45	0.05% formalin	Treatment	15
45	0.05% formalin	Treatment	16
45	0.05% formalin	Treatment	17
45	0.05% formalin	Treatment	18
45	0.05% formalin	Treatment	19
45	0.05% formalin	Treatment	20
46	3uM Fentanyl + 0.05% Formalin	Baseline	0	1.00805
46	3uM Fentanyl + 0.05% Formalin	Treatment	1	0.248575
46	3uM Fentanyl + 0.05% Formalin	Treatment	2	0.178447
46	3uM Fentanyl + 0.05% Formalin	Treatment	3	0.138505
46	3uM Fentanyl + 0.05% Formalin	Treatment	4	0.108273
46	3uM Fentanyl + 0.05% Formalin	Treatment	5	0.123034
46	3uM Fentanyl + 0.05% Formalin	Treatment	6	0.180717
46	3uM Fentanyl + 0.05% Formalin	Treatment	7	1.10362
46	3uM Fentanyl + 0.05% Formalin	Treatment	8	0.581968
46	3uM Fentanyl + 0.05% Formalin	Treatment	9	0.624918
46	3uM Fentanyl + 0.05% Formalin	Treatment	10	0.563688
46	3uM Fentanyl + 0.05% Formalin	Treatment	11	0.731322
46	3uM Fentanyl + 0.05% Formalin	Treatment	12	0.366658
46	3uM Fentanyl + 0.05% Formalin	Treatment	13	0.963937
46	3uM Fentanyl + 0.05% Formalin	Treatment	14	0.97261
46	3uM Fentanyl + 0.05% Formalin	Treatment	15	0.882242
46	3uM Fentanyl + 0.05% Formalin	Treatment	16	0.743397
46	3uM Fentanyl + 0.05% Formalin	Treatment	17	0.801533
46	3uM Fentanyl + 0.05% Formalin	Treatment	18	0.52233
46	3uM Fentanyl + 0.05% Formalin	Treatment	19	0.469203
46	3uM Fentanyl + 0.05% Formalin	Treatment	20	0.502098
47	3uM Fentanyl + 0.05% Formalin	Baseline	0	0.521796
47	3uM Fentanyl + 0.05% Formalin	Treatment	1	0.312793
47	3uM Fentanyl + 0.05% Formalin	Treatment	2	0.748273
47	3uM Fentanyl + 0.05% Formalin	Treatment	3	1.02479
47	3uM Fentanyl + 0.05% Formalin	Treatment	4	0.592445
47	3uM Fentanyl + 0.05% Formalin	Treatment	5	0.88349
47	3uM Fentanyl + 0.05% Formalin	Treatment	6	1.23805
47	3uM Fentanyl + 0.05% Formalin	Treatment	7	1.77893
47	3uM Fentanyl + 0.05% Formalin	Treatment	8	1.9799
47	3uM Fentanyl + 0.05% Formalin	Treatment	9	1.83627
47	3uM Fentanyl + 0.05% Formalin	Treatment	10	1.85627
47	3uM Fentanyl + 0.05% Formalin	Treatment	11	1.51166
47	3uM Fentanyl + 0.05% Formalin	Treatment	12	1.21097
47	3uM Fentanyl + 0.05% Formalin	Treatment	13	0.96866
47	3uM Fentanyl + 0.05% Formalin	Treatment	14	0.664268
47	3uM Fentanyl + 0.05% Formalin	Treatment	15	0.93124
47	3uM Fentanyl + 0.05% Formalin	Treatment	16	0.914602
47	3uM Fentanyl + 0.05% Formalin	Treatment	17	0.503125
47	3uM Fentanyl + 0.05% Formalin	Treatment	18	1.17408
47	3uM Fentanyl + 0.05% Formalin	Treatment	19	0.29459
47	3uM Fentanyl + 0.05% Formalin	Treatment	20	0.203565
48	3uM Fentanyl + 0.05% Formalin	Baseline	0	0.180876
48	3uM Fentanyl + 0.05% Formalin	Treatment	1	1.36187
48	3uM Fentanyl + 0.05% Formalin	Treatment	2	2.6829
48	3uM Fentanyl + 0.05% Formalin	Treatment	3	2.09132
48	3uM Fentanyl + 0.05% Formalin	Treatment	4	2.1866
48	3uM Fentanyl + 0.05% Formalin	Treatment	5	1.94022
48	3uM Fentanyl + 0.05% Formalin	Treatment	6	1.98088
48	3uM Fentanyl + 0.05% Formalin	Treatment	7	1.73625
48	3uM Fentanyl + 0.05% Formalin	Treatment	8	1.30086
48	3uM Fentanyl + 0.05% Formalin	Treatment	9	1.3514
48	3uM Fentanyl + 0.05% Formalin	Treatment	10	1.38961
48	3uM Fentanyl + 0.05% Formalin	Treatment	11	1.11647
48	3uM Fentanyl + 0.05% Formalin	Treatment	12	0.982292
48	3uM Fentanyl + 0.05% Formalin	Treatment	13	1.2042
48	3uM Fentanyl + 0.05% Formalin	Treatment	14	0.667123
48	3uM Fentanyl + 0.05% Formalin	Treatment	15	0.436603
48	3uM Fentanyl + 0.05% Formalin	Treatment	16	0.176522
48	3uM Fentanyl + 0.05% Formalin	Treatment	17	0.322582
48	3uM Fentanyl + 0.05% Formalin	Treatment	18	0.253105
48	3uM Fentanyl + 0.05% Formalin	Treatment	19	0.0380437
48	3uM Fentanyl + 0.05% Formalin	Treatment	20	0.0389078
49	3uM Fentanyl + 0.05% Formalin	Baseline	0	0.594797
49	3uM Fentanyl + 0.05% Formalin	Treatment	1	1.17893
49	3uM Fentanyl + 0.05% Formalin	Treatment	2	2.78457
49	3uM Fentanyl + 0.05% Formalin	Treatment	3	2.74142
49	3uM Fentanyl + 0.05% Formalin	Treatment	4	1.64234
49	3uM Fentanyl + 0.05% Formalin	Treatment	5	1.38237
49	3uM Fentanyl + 0.05% Formalin	Treatment	6	1.63455
49	3uM Fentanyl + 0.05% Formalin	Treatment	7	1.8187
49	3uM Fentanyl + 0.05% Formalin	Treatment	8	1.64194
49	3uM Fentanyl + 0.05% Formalin	Treatment	9	1.00524
49	3uM Fentanyl + 0.05% Formalin	Treatment	10	1.72135
49	3uM Fentanyl + 0.05% Formalin	Treatment	11	1.13419
49	3uM Fentanyl + 0.05% Formalin	Treatment	12	0.594185
49	3uM Fentanyl + 0.05% Formalin	Treatment	13	0.745815
49	3uM Fentanyl + 0.05% Formalin	Treatment	14	0.600225
49	3uM Fentanyl + 0.05% Formalin	Treatment	15	0.630937
49	3uM Fentanyl + 0.05% Formalin	Treatment	16	0.545285
49	3uM Fentanyl + 0.05% Formalin	Treatment	17	0.629645
49	3uM Fentanyl + 0.05% Formalin	Treatment	18	0.376982
49	3uM Fentanyl + 0.05% Formalin	Treatment	19	0.561975
49	3uM Fentanyl + 0.05% Formalin	Treatment	20	0.267088
50	3uM Fentanyl + 0.05% Formalin	Baseline	0	0.675687
50	3uM Fentanyl + 0.05% Formalin	Treatment	1	0.62435
50	3uM Fentanyl + 0.05% Formalin	Treatment	2	0.799717
50	3uM Fentanyl + 0.05% Formalin	Treatment	3	3.27872
50	3uM Fentanyl + 0.05% Formalin	Treatment	4	2.52498
50	3uM Fentanyl + 0.05% Formalin	Treatment	5	1.75548
50	3uM Fentanyl + 0.05% Formalin	Treatment	6	1.2798
50	3uM Fentanyl + 0.05% Formalin	Treatment	7	1.27582
50	3uM Fentanyl + 0.05% Formalin	Treatment	8	1.39074
50	3uM Fentanyl + 0.05% Formalin	Treatment	9	1.34803
50	3uM Fentanyl + 0.05% Formalin	Treatment	10	1.0811
50	3uM Fentanyl + 0.05% Formalin	Treatment	11	0.796377
50	3uM Fentanyl + 0.05% Formalin	Treatment	12	0.80979
50	3uM Fentanyl + 0.05% Formalin	Treatment	13	0.39108
50	3uM Fentanyl + 0.05% Formalin	Treatment	14	0.296358
50	3uM Fentanyl + 0.05% Formalin	Treatment	15	0.119777
50	3uM Fentanyl + 0.05% Formalin	Treatment	16	0.0741135
50	3uM Fentanyl + 0.05% Formalin	Treatment	17	0.054969
50	3uM Fentanyl + 0.05% Formalin	Treatment	18	0.0447865
50	3uM Fentanyl + 0.05% Formalin	Treatment	19	0.0385342
50	3uM Fentanyl + 0.05% Formalin	Treatment	20	0.030759
51	3uM Fentanyl + 0.05% Formalin	Baseline	0	1.01116
51	3uM Fentanyl + 0.05% Formalin	Treatment	1	0.203783
51	3uM Fentanyl + 0.05% Formalin	Treatment	2	0.22511
51	3uM Fentanyl + 0.05% Formalin	Treatment	3	0.517788
51	3uM Fentanyl + 0.05% Formalin	Treatment	4	0.89842
51	3uM Fentanyl + 0.05% Formalin	Treatment	5	0.823243
51	3uM Fentanyl + 0.05% Formalin	Treatment	6	1.15192
51	3uM Fentanyl + 0.05% Formalin	Treatment	7	1.37917
51	3uM Fentanyl + 0.05% Formalin	Treatment	8	1.49157
51	3uM Fentanyl + 0.05% Formalin	Treatment	9	1.29903
51	3uM Fentanyl + 0.05% Formalin	Treatment	10	1.21466
51	3uM Fentanyl + 0.05% Formalin	Treatment	11	0.96763
51	3uM Fentanyl + 0.05% Formalin	Treatment	12	1.28772
51	3uM Fentanyl + 0.05% Formalin	Treatment	13	0.787253
51	3uM Fentanyl + 0.05% Formalin	Treatment	14	0.618227
51	3uM Fentanyl + 0.05% Formalin	Treatment	15	0.88189
51	3uM Fentanyl + 0.05% Formalin	Treatment	16	0.55372
51	3uM Fentanyl + 0.05% Formalin	Treatment	17	0.455902
51	3uM Fentanyl + 0.05% Formalin	Treatment	18	0.574192
51	3uM Fentanyl + 0.05% Formalin	Treatment	19	0.453838
51	3uM Fentanyl + 0.05% Formalin	Treatment	20	0.491985
52	3uM Fentanyl + 0.05% Formalin	Baseline	0	0.615402
52	3uM Fentanyl + 0.05% Formalin	Treatment	1	0.29477
52	3uM Fentanyl + 0.05% Formalin	Treatment	2	1.02845
52	3uM Fentanyl + 0.05% Formalin	Treatment	3	0.632293
52	3uM Fentanyl + 0.05% Formalin	Treatment	4	1.67347
52	3uM Fentanyl + 0.05% Formalin	Treatment	5	1.31188
52	3uM Fentanyl + 0.05% Formalin	Treatment	6	1.77527
52	3uM Fentanyl + 0.05% Formalin	Treatment	7	1.92943
52	3uM Fentanyl + 0.05% Formalin	Treatment	8	1.99948
52	3uM Fentanyl + 0.05% Formalin	Treatment	9	2.16982
52	3uM Fentanyl + 0.05% Formalin	Treatment	10	2.12782
52	3uM Fentanyl + 0.05% Formalin	Treatment	11	1.2033
52	3uM Fentanyl + 0.05% Formalin	Treatment	12	1.14083
52	3uM Fentanyl + 0.05% Formalin	Treatment	13	1.03792
52	3uM Fentanyl + 0.05% Formalin	Treatment	14	0.70396
52	3uM Fentanyl + 0.05% Formalin	Treatment	15
52	3uM Fentanyl + 0.05% Formalin	Treatment	16
52	3uM Fentanyl + 0.05% Formalin	Treatment	17
52	3uM Fentanyl + 0.05% Formalin	Treatment	18
52	3uM Fentanyl + 0.05% Formalin	Treatment	19
52	3uM Fentanyl + 0.05% Formalin	Treatment	20
53	3uM Fentanyl + 0.05% Formalin	Baseline	0	0.905113
53	3uM Fentanyl + 0.05% Formalin	Treatment	1	1.84007
53	3uM Fentanyl + 0.05% Formalin	Treatment	2	1.60961
53	3uM Fentanyl + 0.05% Formalin	Treatment	3	1.10234
53	3uM Fentanyl + 0.05% Formalin	Treatment	4	0.799398
53	3uM Fentanyl + 0.05% Formalin	Treatment	5	1.25565
53	3uM Fentanyl + 0.05% Formalin	Treatment	6	1.38164
53	3uM Fentanyl + 0.05% Formalin	Treatment	7	2.77362
53	3uM Fentanyl + 0.05% Formalin	Treatment	8	2.59532
53	3uM Fentanyl + 0.05% Formalin	Treatment	9	2.61993
53	3uM Fentanyl + 0.05% Formalin	Treatment	10	2.15635
53	3uM Fentanyl + 0.05% Formalin	Treatment	11	1.77328
53	3uM Fentanyl + 0.05% Formalin	Treatment	12	1.08089
53	3uM Fentanyl + 0.05% Formalin	Treatment	13	1.00592
53	3uM Fentanyl + 0.05% Formalin	Treatment	14	0.524717
53	3uM Fentanyl + 0.05% Formalin	Treatment	15
53	3uM Fentanyl + 0.05% Formalin	Treatment	16
53	3uM Fentanyl + 0.05% Formalin	Treatment	17
53	3uM Fentanyl + 0.05% Formalin	Treatment	18
53	3uM Fentanyl + 0.05% Formalin	Treatment	19
53	3uM Fentanyl + 0.05% Formalin	Treatment	20
54	3uM Fentanyl + 0.05% Formalin	Baseline	0	0.812814
54	3uM Fentanyl + 0.05% Formalin	Treatment	1	0.771468
54	3uM Fentanyl + 0.05% Formalin	Treatment	2	0.78393
54	3uM Fentanyl + 0.05% Formalin	Treatment	3	1.7309
54	3uM Fentanyl + 0.05% Formalin	Treatment	4	3.43513
54	3uM Fentanyl + 0.05% Formalin	Treatment	5	3.68865
54	3uM Fentanyl + 0.05% Formalin	Treatment	6	3.23398
54	3uM Fentanyl + 0.05% Formalin	Treatment	7	3.436
54	3uM Fentanyl + 0.05% Formalin	Treatment	8	2.71825
54	3uM Fentanyl + 0.05% Formalin	Treatment	9	2.36518
54	3uM Fentanyl + 0.05% Formalin	Treatment	10	1.90782
54	3uM Fentanyl + 0.05% Formalin	Treatment	11	1.91548
54	3uM Fentanyl + 0.05% Formalin	Treatment	12	1.88958
54	3uM Fentanyl + 0.05% Formalin	Treatment	13	1.43521
54	3uM Fentanyl + 0.05% Formalin	Treatment	14	0.790958
54	3uM Fentanyl + 0.05% Formalin	Treatment	15
54	3uM Fentanyl + 0.05% Formalin	Treatment	16
54	3uM Fentanyl + 0.05% Formalin	Treatment	17
54	3uM Fentanyl + 0.05% Formalin	Treatment	18
54	3uM Fentanyl + 0.05% Formalin	Treatment	19
54	3uM Fentanyl + 0.05% Formalin	Treatment	20
55	3uM Fentanyl + 0.05% Formalin	Baseline	0	0.970669
55	3uM Fentanyl + 0.05% Formalin	Treatment	1	1.88068
55	3uM Fentanyl + 0.05% Formalin	Treatment	2	0.972342
55	3uM Fentanyl + 0.05% Formalin	Treatment	3	0.546337
55	3uM Fentanyl + 0.05% Formalin	Treatment	4	0.851763
55	3uM Fentanyl + 0.05% Formalin	Treatment	5	0.838427
55	3uM Fentanyl + 0.05% Formalin	Treatment	6	1.09576
55	3uM Fentanyl + 0.05% Formalin	Treatment	7	0.439838
55	3uM Fentanyl + 0.05% Formalin	Treatment	8	1.16078
55	3uM Fentanyl + 0.05% Formalin	Treatment	9	1.89648
55	3uM Fentanyl + 0.05% Formalin	Treatment	10	2.25573
55	3uM Fentanyl + 0.05% Formalin	Treatment	11	1.76928
55	3uM Fentanyl + 0.05% Formalin	Treatment	12	2.24102
55	3uM Fentanyl + 0.05% Formalin	Treatment	13	1.7415
55	3uM Fentanyl + 0.05% Formalin	Treatment	14	0.730422
55	3uM Fentanyl + 0.05% Formalin	Treatment	15
55	3uM Fentanyl + 0.05% Formalin	Treatment	16
55	3uM Fentanyl + 0.05% Formalin	Treatment	17
55	3uM Fentanyl + 0.05% Formalin	Treatment	18
55	3uM Fentanyl + 0.05% Formalin	Treatment	19
55	3uM Fentanyl + 0.05% Formalin	Treatment	20
56	3uM Fentanyl + 0.05% Formalin	Baseline	0	0.165185
56	3uM Fentanyl + 0.05% Formalin	Treatment	1	0.0974123
56	3uM Fentanyl + 0.05% Formalin	Treatment	2	0.0353115
56	3uM Fentanyl + 0.05% Formalin	Treatment	3	0.0310615
56	3uM Fentanyl + 0.05% Formalin	Treatment	4	0.0233793
56	3uM Fentanyl + 0.05% Formalin	Treatment	5	0.0218995
56	3uM Fentanyl + 0.05% Formalin	Treatment	6	0.017517
56	3uM Fentanyl + 0.05% Formalin	Treatment	7	0.336168
56	3uM Fentanyl + 0.05% Formalin	Treatment	8	0.590583
56	3uM Fentanyl + 0.05% Formalin	Treatment	9	0.676395
56	3uM Fentanyl + 0.05% Formalin	Treatment	10	0.535737
56	3uM Fentanyl + 0.05% Formalin	Treatment	11	0.649023
56	3uM Fentanyl + 0.05% Formalin	Treatment	12	0.514717
56	3uM Fentanyl + 0.05% Formalin	Treatment	13	0.250573
56	3uM Fentanyl + 0.05% Formalin	Treatment	14	0.143008
56	3uM Fentanyl + 0.05% Formalin	Treatment	15
56	3uM Fentanyl + 0.05% Formalin	Treatment	16
56	3uM Fentanyl + 0.05% Formalin	Treatment	17
56	3uM Fentanyl + 0.05% Formalin	Treatment	18
56	3uM Fentanyl + 0.05% Formalin	Treatment	19
56	3uM Fentanyl + 0.05% Formalin	Treatment	20
57	3uM Fentanyl + 0.05% Formalin	Baseline	0	0.237529
57	3uM Fentanyl + 0.05% Formalin	Treatment	1	0.652855
57	3uM Fentanyl + 0.05% Formalin	Treatment	2	0.991558
57	3uM Fentanyl + 0.05% Formalin	Treatment	3	1.48613
57	3uM Fentanyl + 0.05% Formalin	Treatment	4	1.68543
57	3uM Fentanyl + 0.05% Formalin	Treatment	5	2.12592
57	3uM Fentanyl + 0.05% Formalin	Treatment	6	1.54032
57	3uM Fentanyl + 0.05% Formalin	Treatment	7	1.24172
57	3uM Fentanyl + 0.05% Formalin	Treatment	8	0.988858
57	3uM Fentanyl + 0.05% Formalin	Treatment	9	1.07605
57	3uM Fentanyl + 0.05% Formalin	Treatment	10	1.06609
57	3uM Fentanyl + 0.05% Formalin	Treatment	11	0.581927
57	3uM Fentanyl + 0.05% Formalin	Treatment	12	1.03354
57	3uM Fentanyl + 0.05% Formalin	Treatment	13	0.788228
57	3uM Fentanyl + 0.05% Formalin	Treatment	14	0.063925
57	3uM Fentanyl + 0.05% Formalin	Treatment	15
57	3uM Fentanyl + 0.05% Formalin	Treatment	16
57	3uM Fentanyl + 0.05% Formalin	Treatment	17
57	3uM Fentanyl + 0.05% Formalin	Treatment	18
57	3uM Fentanyl + 0.05% Formalin	Treatment	19
57	3uM Fentanyl + 0.05% Formalin	Treatment	20
58	3uM Fentanyl + 0.05% Formalin	Baseline	0	0.316012
58	3uM Fentanyl + 0.05% Formalin	Treatment	1	1.19812
58	3uM Fentanyl + 0.05% Formalin	Treatment	2	0.870638
58	3uM Fentanyl + 0.05% Formalin	Treatment	3	1.11043
58	3uM Fentanyl + 0.05% Formalin	Treatment	4	0.60709
58	3uM Fentanyl + 0.05% Formalin	Treatment	5	1.25476
58	3uM Fentanyl + 0.05% Formalin	Treatment	6	1.09492
58	3uM Fentanyl + 0.05% Formalin	Treatment	7	0.828468
58	3uM Fentanyl + 0.05% Formalin	Treatment	8	0.851207
58	3uM Fentanyl + 0.05% Formalin	Treatment	9	1.16969
58	3uM Fentanyl + 0.05% Formalin	Treatment	10	0.957005
58	3uM Fentanyl + 0.05% Formalin	Treatment	11	1.12664
58	3uM Fentanyl + 0.05% Formalin	Treatment	12	1.00947
58	3uM Fentanyl + 0.05% Formalin	Treatment	13	0.381637
58	3uM Fentanyl + 0.05% Formalin	Treatment	14	0.175122
58	3uM Fentanyl + 0.05% Formalin	Treatment	15
58	3uM Fentanyl + 0.05% Formalin	Treatment	16
58	3uM Fentanyl + 0.05% Formalin	Treatment	17
58	3uM Fentanyl + 0.05% Formalin	Treatment	18
58	3uM Fentanyl + 0.05% Formalin	Treatment	19
58	3uM Fentanyl + 0.05% Formalin	Treatment	20
59	3uM Fentanyl + 0.05% Formalin	Baseline	0	0.654138
59	3uM Fentanyl + 0.05% Formalin	Treatment	1	1.33407
59	3uM Fentanyl + 0.05% Formalin	Treatment	2	0.594595
59	3uM Fentanyl + 0.05% Formalin	Treatment	3	0.45753
59	3uM Fentanyl + 0.05% Formalin	Treatment	4	0.849248
59	3uM Fentanyl + 0.05% Formalin	Treatment	5	1.37377
59	3uM Fentanyl + 0.05% Formalin	Treatment	6	1.5045
59	3uM Fentanyl + 0.05% Formalin	Treatment	7	1.31863
59	3uM Fentanyl + 0.05% Formalin	Treatment	8	1.20901
59	3uM Fentanyl + 0.05% Formalin	Treatment	9	0.953282
59	3uM Fentanyl + 0.05% Formalin	Treatment	10	0.614938
59	3uM Fentanyl + 0.05% Formalin	Treatment	11	0.900183
59	3uM Fentanyl + 0.05% Formalin	Treatment	12	0.652927
59	3uM Fentanyl + 0.05% Formalin	Treatment	13	0.641742
59	3uM Fentanyl + 0.05% Formalin	Treatment	14	0.41042
59	3uM Fentanyl + 0.05% Formalin	Treatment	15
59	3uM Fentanyl + 0.05% Formalin	Treatment	16
59	3uM Fentanyl + 0.05% Formalin	Treatment	17
59	3uM Fentanyl + 0.05% Formalin	Treatment	18
59	3uM Fentanyl + 0.05% Formalin	Treatment	19
59	3uM Fentanyl + 0.05% Formalin	Treatment	20
60	3uM Fentanyl	Baseline	0	0.691004
60	3uM Fentanyl	Treatment	1	0.1369
60	3uM Fentanyl	Treatment	2	0.334992
60	3uM Fentanyl	Treatment	3	0.461408
60	3uM Fentanyl	Treatment	4	0.512523
60	3uM Fentanyl	Treatment	5	0.171385
60	3uM Fentanyl	Treatment	6	0.26764
60	3uM Fentanyl	Treatment	7	0.301218
60	3uM Fentanyl	Treatment	8	0.423133
60	3uM Fentanyl	Treatment	9	0.31553
60	3uM Fentanyl	Treatment	10	0.166251
60	3uM Fentanyl	Treatment	11	0.142594
60	3uM Fentanyl	Treatment	12	0.221292
60	3uM Fentanyl	Treatment	13	1.17188
60	3uM Fentanyl	Treatment	14	0.834518
60	3uM Fentanyl	Treatment	15	0.353137
60	3uM Fentanyl	Treatment	16	0.231098
60	3uM Fentanyl	Treatment	17	0.104054
60	3uM Fentanyl	Treatment	18	0.261955
60	3uM Fentanyl	Treatment	19	0.170117
60	3uM Fentanyl	Treatment	20	0.393485
61	3uM Fentanyl	Baseline	0	0.823275
61	3uM Fentanyl	Treatment	1	0.394617
61	3uM Fentanyl	Treatment	2	0.0819885
61	3uM Fentanyl	Treatment	3	0.135164
61	3uM Fentanyl	Treatment	4	0.0707237
61	3uM Fentanyl	Treatment	5	0.190733
61	3uM Fentanyl	Treatment	6	0.201852
61	3uM Fentanyl	Treatment	7	0.321812
61	3uM Fentanyl	Treatment	8	0.537738
61	3uM Fentanyl	Treatment	9	0.946502
61	3uM Fentanyl	Treatment	10	0.183337
61	3uM Fentanyl	Treatment	11	0.572143
61	3uM Fentanyl	Treatment	12	0.88501
61	3uM Fentanyl	Treatment	13	0.277118
61	3uM Fentanyl	Treatment	14	0.206072
61	3uM Fentanyl	Treatment	15	0.767123
61	3uM Fentanyl	Treatment	16	0.461237
61	3uM Fentanyl	Treatment	17	0.535828
61	3uM Fentanyl	Treatment	18	0.317147
61	3uM Fentanyl	Treatment	19	0.590398
61	3uM Fentanyl	Treatment	20	0.222505
62	3uM Fentanyl	Baseline	0	0.911992
62	3uM Fentanyl	Treatment	1	0.103279
62	3uM Fentanyl	Treatment	2	0.0886528
62	3uM Fentanyl	Treatment	3	0.0815438
62	3uM Fentanyl	Treatment	4	0.166793
62	3uM Fentanyl	Treatment	5	0.280552
62	3uM Fentanyl	Treatment	6	0.326332
62	3uM Fentanyl	Treatment	7	0.0413638
62	3uM Fentanyl	Treatment	8	0.377003
62	3uM Fentanyl	Treatment	9	0.22901
62	3uM Fentanyl	Treatment	10	0.372498
62	3uM Fentanyl	Treatment	11	0.371412
62	3uM Fentanyl	Treatment	12	0.140413
62	3uM Fentanyl	Treatment	13	0.335033
62	3uM Fentanyl	Treatment	14	0.232388
62	3uM Fentanyl	Treatment	15	0.359893
62	3uM Fentanyl	Treatment	16	0.107206
62	3uM Fentanyl	Treatment	17	0.208022
62	3uM Fentanyl	Treatment	18	0.18664
62	3uM Fentanyl	Treatment	19	0.163211
62	3uM Fentanyl	Treatment	20	0.25533
63	3uM Fentanyl	Baseline	0	0.472645
63	3uM Fentanyl	Treatment	1	0.656602
63	3uM Fentanyl	Treatment	2	0.207192
63	3uM Fentanyl	Treatment	3	0.3314
63	3uM Fentanyl	Treatment	4	0.431557
63	3uM Fentanyl	Treatment	5	0.31949
63	3uM Fentanyl	Treatment	6	0.162612
63	3uM Fentanyl	Treatment	7	0.241075
63	3uM Fentanyl	Treatment	8	0.181332
63	3uM Fentanyl	Treatment	9	0.163858
63	3uM Fentanyl	Treatment	10	0.288827
63	3uM Fentanyl	Treatment	11	1.16563
63	3uM Fentanyl	Treatment	12	0.643527
63	3uM Fentanyl	Treatment	13	0.55116
63	3uM Fentanyl	Treatment	14	0.274228
63	3uM Fentanyl	Treatment	15	0.399808
63	3uM Fentanyl	Treatment	16	0.856437
63	3uM Fentanyl	Treatment	17	0.981497
63	3uM Fentanyl	Treatment	18	0.2952
63	3uM Fentanyl	Treatment	19	0.371637
63	3uM Fentanyl	Treatment	20	1.04591
64	3uM Fentanyl	Baseline	0	0.735328
64	3uM Fentanyl	Treatment	1	0.830337
64	3uM Fentanyl	Treatment	2	0.636553
64	3uM Fentanyl	Treatment	3	1.2167
64	3uM Fentanyl	Treatment	4	0.629197
64	3uM Fentanyl	Treatment	5	0.365562
64	3uM Fentanyl	Treatment	6	0.52013
64	3uM Fentanyl	Treatment	7	0.324617
64	3uM Fentanyl	Treatment	8	0.37249
64	3uM Fentanyl	Treatment	9	0.457687
64	3uM Fentanyl	Treatment	10	0.289537
64	3uM Fentanyl	Treatment	11	0.223755
64	3uM Fentanyl	Treatment	12	0.260445
64	3uM Fentanyl	Treatment	13	0.517977
64	3uM Fentanyl	Treatment	14	0.367388
64	3uM Fentanyl	Treatment	15	0.35578
64	3uM Fentanyl	Treatment	16	0.303557
64	3uM Fentanyl	Treatment	17	0.433553
64	3uM Fentanyl	Treatment	18	0.360662
64	3uM Fentanyl	Treatment	19	0.325435
64	3uM Fentanyl	Treatment	20	0.583245
65	3uM Fentanyl	Baseline	0	0.598071
65	3uM Fentanyl	Treatment	1	0.165223
65	3uM Fentanyl	Treatment	2	0.362948
65	3uM Fentanyl	Treatment	3	1.58918
65	3uM Fentanyl	Treatment	4	0.188152
65	3uM Fentanyl	Treatment	5	0.398255
65	3uM Fentanyl	Treatment	6	0.516963
65	3uM Fentanyl	Treatment	7	0.235142
65	3uM Fentanyl	Treatment	8	0.280797
65	3uM Fentanyl	Treatment	9	0.270735
65	3uM Fentanyl	Treatment	10	0.264288
65	3uM Fentanyl	Treatment	11	0.391513
65	3uM Fentanyl	Treatment	12	0.279192
65	3uM Fentanyl	Treatment	13	0.18196
65	3uM Fentanyl	Treatment	14	0.352552
65	3uM Fentanyl	Treatment	15	0.477358
65	3uM Fentanyl	Treatment	16	0.192892
65	3uM Fentanyl	Treatment	17	0.205687
65	3uM Fentanyl	Treatment	18	0.305747
65	3uM Fentanyl	Treatment	19	0.256873
65	3uM Fentanyl	Treatment	20	0.54184
66	3uM Fentanyl	Baseline	0	0.360692
66	3uM Fentanyl	Treatment	1	0.316438
66	3uM Fentanyl	Treatment	2	0.149858
66	3uM Fentanyl	Treatment	3	0.223102
66	3uM Fentanyl	Treatment	4	0.44261
66	3uM Fentanyl	Treatment	5	0.552465
66	3uM Fentanyl	Treatment	6	0.661283
66	3uM Fentanyl	Treatment	7	0.308345
66	3uM Fentanyl	Treatment	8	0.3688
66	3uM Fentanyl	Treatment	9	0.91444
66	3uM Fentanyl	Treatment	10	1.34491
66	3uM Fentanyl	Treatment	11	1.3935
66	3uM Fentanyl	Treatment	12	0.311702
66	3uM Fentanyl	Treatment	13	0.15441
66	3uM Fentanyl	Treatment	14	0.181073
66	3uM Fentanyl	Treatment	15	0.128038
66	3uM Fentanyl	Treatment	16	0.037709
66	3uM Fentanyl	Treatment	17	0.0380748
66	3uM Fentanyl	Treatment	18	0.0396558
66	3uM Fentanyl	Treatment	19	0.0801208
66	3uM Fentanyl	Treatment	20	0.079854
67	3uM Fentanyl	Baseline	0	0.325008
67	3uM Fentanyl	Treatment	1	1.80438
67	3uM Fentanyl	Treatment	2	0.964793
67	3uM Fentanyl	Treatment	3	2.26808
67	3uM Fentanyl	Treatment	4	2.90345
67	3uM Fentanyl	Treatment	5	2.43927
67	3uM Fentanyl	Treatment	6	2.53767
67	3uM Fentanyl	Treatment	7	1.3839
67	3uM Fentanyl	Treatment	8	0.33827
67	3uM Fentanyl	Treatment	9	0.356173
67	3uM Fentanyl	Treatment	10	0.305187
67	3uM Fentanyl	Treatment	11	0.531473
67	3uM Fentanyl	Treatment	12	1.69108
67	3uM Fentanyl	Treatment	13	1.48516
67	3uM Fentanyl	Treatment	14	0.893048
67	3uM Fentanyl	Treatment	15	0.568252
67	3uM Fentanyl	Treatment	16	0.191105
67	3uM Fentanyl	Treatment	17	0.1546
67	3uM Fentanyl	Treatment	18	0.12555
67	3uM Fentanyl	Treatment	19	0.339723
67	3uM Fentanyl	Treatment	20	0.43072
68	3uM Fentanyl	Baseline	0	1.06651
68	3uM Fentanyl	Treatment	1	1.40044
68	3uM Fentanyl	Treatment	2	1.14674
68	3uM Fentanyl	Treatment	3	1.17445
68	3uM Fentanyl	Treatment	4	1.99327
68	3uM Fentanyl	Treatment	5	1.49532
68	3uM Fentanyl	Treatment	6	3.81495
68	3uM Fentanyl	Treatment	7	2.7045
68	3uM Fentanyl	Treatment	8	0.643278
68	3uM Fentanyl	Treatment	9	0.625557
68	3uM Fentanyl	Treatment	10	0.971675
68	3uM Fentanyl	Treatment	11	1.50264
68	3uM Fentanyl	Treatment	12	1.21291
68	3uM Fentanyl	Treatment	13	1.77692
68	3uM Fentanyl	Treatment	14	0.584992
68	3uM Fentanyl	Treatment	15	0.578528
68	3uM Fentanyl	Treatment	16	0.869142
68	3uM Fentanyl	Treatment	17	0.996543
68	3uM Fentanyl	Treatment	18	0.7541
68	3uM Fentanyl	Treatment	19	0.84588
68	3uM Fentanyl	Treatment	20	0.778343
69	3uM Fentanyl	Baseline	0	0.242216
69	3uM Fentanyl	Treatment	1	0.43752
69	3uM Fentanyl	Treatment	2	3.2555
69	3uM Fentanyl	Treatment	3	4.84878
69	3uM Fentanyl	Treatment	4	3.61788
69	3uM Fentanyl	Treatment	5	2.47003
69	3uM Fentanyl	Treatment	6	2.25807
69	3uM Fentanyl	Treatment	7	2.1494
69	3uM Fentanyl	Treatment	8	0.154948
69	3uM Fentanyl	Treatment	9	0.140892
69	3uM Fentanyl	Treatment	10	0.181673
69	3uM Fentanyl	Treatment	11	0.183182
69	3uM Fentanyl	Treatment	12	0.268245
69	3uM Fentanyl	Treatment	13	0.375712
69	3uM Fentanyl	Treatment	14	0.247702
69	3uM Fentanyl	Treatment	15	0.256765
69	3uM Fentanyl	Treatment	16	0.37629
69	3uM Fentanyl	Treatment	17	0.982588
69	3uM Fentanyl	Treatment	18	1.58381
69	3uM Fentanyl	Treatment	19	1.83057
69	3uM Fentanyl	Treatment	20	0.114656
70	3uM Fentanyl	Baseline	0	0.658149
70	3uM Fentanyl	Treatment	1	0.0769717
70	3uM Fentanyl	Treatment	2	0.136971
70	3uM Fentanyl	Treatment	3	0.195388
70	3uM Fentanyl	Treatment	4	0.19638
70	3uM Fentanyl	Treatment	5	0.161755
70	3uM Fentanyl	Treatment	6	0.12699
70	3uM Fentanyl	Treatment	7	0.137746
70	3uM Fentanyl	Treatment	8	0.114003
70	3uM Fentanyl	Treatment	9	0.116134
70	3uM Fentanyl	Treatment	10	0.229652
70	3uM Fentanyl	Treatment	11	0.120195
70	3uM Fentanyl	Treatment	12	0.113075
70	3uM Fentanyl	Treatment	13	0.0903377
70	3uM Fentanyl	Treatment	14	0.0697577
70	3uM Fentanyl	Treatment	15	0.0941112
70	3uM Fentanyl	Treatment	16	0.0755403
70	3uM Fentanyl	Treatment	17	0.053495
70	3uM Fentanyl	Treatment	18	0.0517208
70	3uM Fentanyl	Treatment	19	0.0513178
70	3uM Fentanyl	Treatment	20	0.0488715
71	3uM Fentanyl	Baseline	0	0.127618
71	3uM Fentanyl	Treatment	1	0.0637647
71	3uM Fentanyl	Treatment	2	0.0538168
71	3uM Fentanyl	Treatment	3	0.061054
71	3uM Fentanyl	Treatment	4	0.121417
71	3uM Fentanyl	Treatment	5	0.0753825
71	3uM Fentanyl	Treatment	6	0.120186
71	3uM Fentanyl	Treatment	7	0.0978213
71	3uM Fentanyl	Treatment	8	0.032729
71	3uM Fentanyl	Treatment	9	0.0419182
71	3uM Fentanyl	Treatment	10	0.0582908
71	3uM Fentanyl	Treatment	11	0.0640692
71	3uM Fentanyl	Treatment	12	0.045454
71	3uM Fentanyl	Treatment	13	0.0946127
71	3uM Fentanyl	Treatment	14	0.0611478
71	3uM Fentanyl	Treatment	15	0.0719843
71	3uM Fentanyl	Treatment	16	0.115456
71	3uM Fentanyl	Treatment	17	0.0924283
71	3uM Fentanyl	Treatment	18	0.0686827
71	3uM Fentanyl	Treatment	19	0.0694425
71	3uM Fentanyl	Treatment	20	0.0691753
72	3uM Fentanyl	Baseline	0	0.655799
72	3uM Fentanyl	Treatment	1	0.507318
72	3uM Fentanyl	Treatment	2	0.318752
72	3uM Fentanyl	Treatment	3	0.391535
72	3uM Fentanyl	Treatment	4	0.27743
72	3uM Fentanyl	Treatment	5	0.618972
72	3uM Fentanyl	Treatment	6	0.48479
72	3uM Fentanyl	Treatment	7	0.491253
72	3uM Fentanyl	Treatment	8	0.227308
72	3uM Fentanyl	Treatment	9	0.142514
72	3uM Fentanyl	Treatment	10	0.895867
72	3uM Fentanyl	Treatment	11	0.470092
72	3uM Fentanyl	Treatment	12	0.233857
72	3uM Fentanyl	Treatment	13	0.1426
72	3uM Fentanyl	Treatment	14	0.181397
72	3uM Fentanyl	Treatment	15	0.532128
72	3uM Fentanyl	Treatment	16	0.436767
72	3uM Fentanyl	Treatment	17	0.228572
72	3uM Fentanyl	Treatment	18	0.23755
72	3uM Fentanyl	Treatment	19	0.291773
72	3uM Fentanyl	Treatment	20	0.140378
73	3uM Fentanyl	Baseline	0	0.195181
73	3uM Fentanyl	Treatment	1	0.527402
73	3uM Fentanyl	Treatment	2	0.732908
73	3uM Fentanyl	Treatment	3	0.327833
73	3uM Fentanyl	Treatment	4	0.293568
73	3uM Fentanyl	Treatment	5	0.27836
73	3uM Fentanyl	Treatment	6	0.316243
73	3uM Fentanyl	Treatment	7	0.666423
73	3uM Fentanyl	Treatment	8	0.792772
73	3uM Fentanyl	Treatment	9	0.28255
73	3uM Fentanyl	Treatment	10	0.679587
73	3uM Fentanyl	Treatment	11	0.25258
73	3uM Fentanyl	Treatment	12	0.339353
73	3uM Fentanyl	Treatment	13	0.434443
73	3uM Fentanyl	Treatment	14	0.794258
73	3uM Fentanyl	Treatment	15	0.768877
73	3uM Fentanyl	Treatment	16	0.858165
73	3uM Fentanyl	Treatment	17	0.306913
73	3uM Fentanyl	Treatment	18	0.634195
73	3uM Fentanyl	Treatment	19	0.173042
73	3uM Fentanyl	Treatment	20	0.631827
74	4uM CTAP + 3uM Fentanyl + 0.05% Formalin	Baseline	0	0.946872
74	4uM CTAP + 3uM Fentanyl + 0.05% Formalin	Treatment	1	0.97205
74	4uM CTAP + 3uM Fentanyl + 0.05% Formalin	Treatment	2	0.513723
74	4uM CTAP + 3uM Fentanyl + 0.05% Formalin	Treatment	3	0.157604
74	4uM CTAP + 3uM Fentanyl + 0.05% Formalin	Treatment	4	0.147524
74	4uM CTAP + 3uM Fentanyl + 0.05% Formalin	Treatment	5	0.149839
74	4uM CTAP + 3uM Fentanyl + 0.05% Formalin	Treatment	6	0.142446
74	4uM CTAP + 3uM Fentanyl + 0.05% Formalin	Treatment	7	0.170037
74	4uM CTAP + 3uM Fentanyl + 0.05% Formalin	Treatment	8	0.144233
74	4uM CTAP + 3uM Fentanyl + 0.05% Formalin	Treatment	9	0.149396
74	4uM CTAP + 3uM Fentanyl + 0.05% Formalin	Treatment	10	0.174348
74	4uM CTAP + 3uM Fentanyl + 0.05% Formalin	Treatment	11	0.166139
74	4uM CTAP + 3uM Fentanyl + 0.05% Formalin	Treatment	12	0.0991697
74	4uM CTAP + 3uM Fentanyl + 0.05% Formalin	Treatment	13	0.0845597
74	4uM CTAP + 3uM Fentanyl + 0.05% Formalin	Treatment	14	0.0669648
74	4uM CTAP + 3uM Fentanyl + 0.05% Formalin	Treatment	15	0.0516942
74	4uM CTAP + 3uM Fentanyl + 0.05% Formalin	Treatment	16	0.0419168
74	4uM CTAP + 3uM Fentanyl + 0.05% Formalin	Treatment	17	0.131587
74	4uM CTAP + 3uM Fentanyl + 0.05% Formalin	Treatment	18	0.124419
74	4uM CTAP + 3uM Fentanyl + 0.05% Formalin	Treatment	19	0.0619498
74	4uM CTAP + 3uM Fentanyl + 0.05% Formalin	Treatment	20	0.038717
75	4uM CTAP + 3uM Fentanyl + 0.05% Formalin	Baseline	0	0.3924
75	4uM CTAP + 3uM Fentanyl + 0.05% Formalin	Treatment	1	4.27867
75	4uM CTAP + 3uM Fentanyl + 0.05% Formalin	Treatment	2	2.02612
75	4uM CTAP + 3uM Fentanyl + 0.05% Formalin	Treatment	3	0.680432
75	4uM CTAP + 3uM Fentanyl + 0.05% Formalin	Treatment	4	0.246708
75	4uM CTAP + 3uM Fentanyl + 0.05% Formalin	Treatment	5	0.0819603
75	4uM CTAP + 3uM Fentanyl + 0.05% Formalin	Treatment	6	0.0412768
75	4uM CTAP + 3uM Fentanyl + 0.05% Formalin	Treatment	7	0.0285775
75	4uM CTAP + 3uM Fentanyl + 0.05% Formalin	Treatment	8	0.0526895
75	4uM CTAP + 3uM Fentanyl + 0.05% Formalin	Treatment	9	0.0426178
75	4uM CTAP + 3uM Fentanyl + 0.05% Formalin	Treatment	10	0.0228847
75	4uM CTAP + 3uM Fentanyl + 0.05% Formalin	Treatment	11	0.0296478
75	4uM CTAP + 3uM Fentanyl + 0.05% Formalin	Treatment	12	0.0285347
75	4uM CTAP + 3uM Fentanyl + 0.05% Formalin	Treatment	13	0.0307012
75	4uM CTAP + 3uM Fentanyl + 0.05% Formalin	Treatment	14	0.028344
75	4uM CTAP + 3uM Fentanyl + 0.05% Formalin	Treatment	15	0.0307222
75	4uM CTAP + 3uM Fentanyl + 0.05% Formalin	Treatment	16	0.0266157
75	4uM CTAP + 3uM Fentanyl + 0.05% Formalin	Treatment	17	0.0343547
75	4uM CTAP + 3uM Fentanyl + 0.05% Formalin	Treatment	18	0.0330563
75	4uM CTAP + 3uM Fentanyl + 0.05% Formalin	Treatment	19	0.0319532
75	4uM CTAP + 3uM Fentanyl + 0.05% Formalin	Treatment	20	0.0321827
76	4uM CTAP + 3uM Fentanyl + 0.05% Formalin	Baseline	0	0.191403
76	4uM CTAP + 3uM Fentanyl + 0.05% Formalin	Treatment	1	3.20798
76	4uM CTAP + 3uM Fentanyl + 0.05% Formalin	Treatment	2	1.37405
76	4uM CTAP + 3uM Fentanyl + 0.05% Formalin	Treatment	3	0.667772
76	4uM CTAP + 3uM Fentanyl + 0.05% Formalin	Treatment	4	0.354087
76	4uM CTAP + 3uM Fentanyl + 0.05% Formalin	Treatment	5	0.113665
76	4uM CTAP + 3uM Fentanyl + 0.05% Formalin	Treatment	6	0.0349812
76	4uM CTAP + 3uM Fentanyl + 0.05% Formalin	Treatment	7	0.0224035
76	4uM CTAP + 3uM Fentanyl + 0.05% Formalin	Treatment	8	0.02551
76	4uM CTAP + 3uM Fentanyl + 0.05% Formalin	Treatment	9	0.0291067
76	4uM CTAP + 3uM Fentanyl + 0.05% Formalin	Treatment	10	0.0224487
76	4uM CTAP + 3uM Fentanyl + 0.05% Formalin	Treatment	11	0.0270527
76	4uM CTAP + 3uM Fentanyl + 0.05% Formalin	Treatment	12	0.0227482
76	4uM CTAP + 3uM Fentanyl + 0.05% Formalin	Treatment	13	0.025196
76	4uM CTAP + 3uM Fentanyl + 0.05% Formalin	Treatment	14	0.0247558
76	4uM CTAP + 3uM Fentanyl + 0.05% Formalin	Treatment	15	0.0290853
76	4uM CTAP + 3uM Fentanyl + 0.05% Formalin	Treatment	16	0.0255417
76	4uM CTAP + 3uM Fentanyl + 0.05% Formalin	Treatment	17	0.0404502
76	4uM CTAP + 3uM Fentanyl + 0.05% Formalin	Treatment	18	0.0455827
76	4uM CTAP + 3uM Fentanyl + 0.05% Formalin	Treatment	19	0.044461
76	4uM CTAP + 3uM Fentanyl + 0.05% Formalin	Treatment	20	0.0544667
77	4uM CTAP + 3uM Fentanyl + 0.05% Formalin	Baseline	0	0.075383
77	4uM CTAP + 3uM Fentanyl + 0.05% Formalin	Treatment	1	0.0501345
77	4uM CTAP + 3uM Fentanyl + 0.05% Formalin	Treatment	2	0.0398722
77	4uM CTAP + 3uM Fentanyl + 0.05% Formalin	Treatment	3	0.247828
77	4uM CTAP + 3uM Fentanyl + 0.05% Formalin	Treatment	4	0.378015
77	4uM CTAP + 3uM Fentanyl + 0.05% Formalin	Treatment	5	0.406642
77	4uM CTAP + 3uM Fentanyl + 0.05% Formalin	Treatment	6	0.148087
77	4uM CTAP + 3uM Fentanyl + 0.05% Formalin	Treatment	7	0.073401
77	4uM CTAP + 3uM Fentanyl + 0.05% Formalin	Treatment	8	0.0477212
77	4uM CTAP + 3uM Fentanyl + 0.05% Formalin	Treatment	9	0.0506983
77	4uM CTAP + 3uM Fentanyl + 0.05% Formalin	Treatment	10	0.165091
77	4uM CTAP + 3uM Fentanyl + 0.05% Formalin	Treatment	11	0.0634292
77	4uM CTAP + 3uM Fentanyl + 0.05% Formalin	Treatment	12	0.0580513
77	4uM CTAP + 3uM Fentanyl + 0.05% Formalin	Treatment	13	0.0464682
77	4uM CTAP + 3uM Fentanyl + 0.05% Formalin	Treatment	14	0.043925
77	4uM CTAP + 3uM Fentanyl + 0.05% Formalin	Treatment	15	0.0392305
77	4uM CTAP + 3uM Fentanyl + 0.05% Formalin	Treatment	16	0.034807
77	4uM CTAP + 3uM Fentanyl + 0.05% Formalin	Treatment	17	0.0365175
77	4uM CTAP + 3uM Fentanyl + 0.05% Formalin	Treatment	18	0.0305402
77	4uM CTAP + 3uM Fentanyl + 0.05% Formalin	Treatment	19	0.0300807
77	4uM CTAP + 3uM Fentanyl + 0.05% Formalin	Treatment	20	0.0272522
78	4uM CTAP + 3uM Fentanyl + 0.05% Formalin	Baseline	0	0.610304
78	4uM CTAP + 3uM Fentanyl + 0.05% Formalin	Treatment	1	0.12291
78	4uM CTAP + 3uM Fentanyl + 0.05% Formalin	Treatment	2	2.04282
78	4uM CTAP + 3uM Fentanyl + 0.05% Formalin	Treatment	3	3.06202
78	4uM CTAP + 3uM Fentanyl + 0.05% Formalin	Treatment	4	2.1527
78	4uM CTAP + 3uM Fentanyl + 0.05% Formalin	Treatment	5	1.50603
78	4uM CTAP + 3uM Fentanyl + 0.05% Formalin	Treatment	6	1.48521
78	4uM CTAP + 3uM Fentanyl + 0.05% Formalin	Treatment	7	0.811562
78	4uM CTAP + 3uM Fentanyl + 0.05% Formalin	Treatment	8	0.59572
78	4uM CTAP + 3uM Fentanyl + 0.05% Formalin	Treatment	9	0.410482
78	4uM CTAP + 3uM Fentanyl + 0.05% Formalin	Treatment	10	0.223897
78	4uM CTAP + 3uM Fentanyl + 0.05% Formalin	Treatment	11	0.172193
78	4uM CTAP + 3uM Fentanyl + 0.05% Formalin	Treatment	12	0.0909592
78	4uM CTAP + 3uM Fentanyl + 0.05% Formalin	Treatment	13	0.0411062
78	4uM CTAP + 3uM Fentanyl + 0.05% Formalin	Treatment	14	0.0358215
78	4uM CTAP + 3uM Fentanyl + 0.05% Formalin	Treatment	15	0.0994295
78	4uM CTAP + 3uM Fentanyl + 0.05% Formalin	Treatment	16	0.066533
78	4uM CTAP + 3uM Fentanyl + 0.05% Formalin	Treatment	17	0.0563798
78	4uM CTAP + 3uM Fentanyl + 0.05% Formalin	Treatment	18	0.0484425
78	4uM CTAP + 3uM Fentanyl + 0.05% Formalin	Treatment	19	0.0485462
78	4uM CTAP + 3uM Fentanyl + 0.05% Formalin	Treatment	20	0.0418013
79	4uM CTAP + 3uM Fentanyl + 0.05% Formalin	Baseline	0	0.667142
79	4uM CTAP + 3uM Fentanyl + 0.05% Formalin	Treatment	1	3.64502
79	4uM CTAP + 3uM Fentanyl + 0.05% Formalin	Treatment	2	4.36995
79	4uM CTAP + 3uM Fentanyl + 0.05% Formalin	Treatment	3	3.64095
79	4uM CTAP + 3uM Fentanyl + 0.05% Formalin	Treatment	4	2.60847
79	4uM CTAP + 3uM Fentanyl + 0.05% Formalin	Treatment	5	1.5955
79	4uM CTAP + 3uM Fentanyl + 0.05% Formalin	Treatment	6	0.759133
79	4uM CTAP + 3uM Fentanyl + 0.05% Formalin	Treatment	7	0.666728
79	4uM CTAP + 3uM Fentanyl + 0.05% Formalin	Treatment	8	0.131186
79	4uM CTAP + 3uM Fentanyl + 0.05% Formalin	Treatment	9	0.0907873
79	4uM CTAP + 3uM Fentanyl + 0.05% Formalin	Treatment	10	0.035941
79	4uM CTAP + 3uM Fentanyl + 0.05% Formalin	Treatment	11	0.0318418
79	4uM CTAP + 3uM Fentanyl + 0.05% Formalin	Treatment	12	0.0234782
79	4uM CTAP + 3uM Fentanyl + 0.05% Formalin	Treatment	13	0.0539862
79	4uM CTAP + 3uM Fentanyl + 0.05% Formalin	Treatment	14	0.0241475
79	4uM CTAP + 3uM Fentanyl + 0.05% Formalin	Treatment	15	0.114291
79	4uM CTAP + 3uM Fentanyl + 0.05% Formalin	Treatment	16	0.040509
79	4uM CTAP + 3uM Fentanyl + 0.05% Formalin	Treatment	17	0.0250937
79	4uM CTAP + 3uM Fentanyl + 0.05% Formalin	Treatment	18	0.0296853
79	4uM CTAP + 3uM Fentanyl + 0.05% Formalin	Treatment	19	0.0318515
79	4uM CTAP + 3uM Fentanyl + 0.05% Formalin	Treatment	20	0.0292907
80	4uM CTAP + 3uM Fentanyl + 0.05% Formalin	Baseline	0	0.171614
80	4uM CTAP + 3uM Fentanyl + 0.05% Formalin	Treatment	1	1.43409
80	4uM CTAP + 3uM Fentanyl + 0.05% Formalin	Treatment	2	1.21227
80	4uM CTAP + 3uM Fentanyl + 0.05% Formalin	Treatment	3	2.08635
80	4uM CTAP + 3uM Fentanyl + 0.05% Formalin	Treatment	4	1.66604
80	4uM CTAP + 3uM Fentanyl + 0.05% Formalin	Treatment	5	1.14069
80	4uM CTAP + 3uM Fentanyl + 0.05% Formalin	Treatment	6	0.5784
80	4uM CTAP + 3uM Fentanyl + 0.05% Formalin	Treatment	7	0.557805
80	4uM CTAP + 3uM Fentanyl + 0.05% Formalin	Treatment	8	0.439555
80	4uM CTAP + 3uM Fentanyl + 0.05% Formalin	Treatment	9	0.163046
80	4uM CTAP + 3uM Fentanyl + 0.05% Formalin	Treatment	10	0.115062
80	4uM CTAP + 3uM Fentanyl + 0.05% Formalin	Treatment	11	0.0432602
80	4uM CTAP + 3uM Fentanyl + 0.05% Formalin	Treatment	12	0.0359192
80	4uM CTAP + 3uM Fentanyl + 0.05% Formalin	Treatment	13	0.0658833
80	4uM CTAP + 3uM Fentanyl + 0.05% Formalin	Treatment	14	0.0418312
80	4uM CTAP + 3uM Fentanyl + 0.05% Formalin	Treatment	15	0.034011
80	4uM CTAP + 3uM Fentanyl + 0.05% Formalin	Treatment	16	0.0259895
80	4uM CTAP + 3uM Fentanyl + 0.05% Formalin	Treatment	17	0.0282068
80	4uM CTAP + 3uM Fentanyl + 0.05% Formalin	Treatment	18	0.025491
80	4uM CTAP + 3uM Fentanyl + 0.05% Formalin	Treatment	19	0.0270233
80	4uM CTAP + 3uM Fentanyl + 0.05% Formalin	Treatment	20	0.0242758
81	4uM CTAP + 3uM Fentanyl + 0.05% Formalin	Baseline	0	0.671621
81	4uM CTAP + 3uM Fentanyl + 0.05% Formalin	Treatment	1	2.63412
81	4uM CTAP + 3uM Fentanyl + 0.05% Formalin	Treatment	2	5.23548
81	4uM CTAP + 3uM Fentanyl + 0.05% Formalin	Treatment	3	4.27068
81	4uM CTAP + 3uM Fentanyl + 0.05% Formalin	Treatment	4	2.25843
81	4uM CTAP + 3uM Fentanyl + 0.05% Formalin	Treatment	5	1.08731
81	4uM CTAP + 3uM Fentanyl + 0.05% Formalin	Treatment	6	0.473228
81	4uM CTAP + 3uM Fentanyl + 0.05% Formalin	Treatment	7	0.146892
81	4uM CTAP + 3uM Fentanyl + 0.05% Formalin	Treatment	8	0.0940867
81	4uM CTAP + 3uM Fentanyl + 0.05% Formalin	Treatment	9	0.0291598
81	4uM CTAP + 3uM Fentanyl + 0.05% Formalin	Treatment	10	0.0389555
81	4uM CTAP + 3uM Fentanyl + 0.05% Formalin	Treatment	11	0.163712
81	4uM CTAP + 3uM Fentanyl + 0.05% Formalin	Treatment	12	0.0376065
81	4uM CTAP + 3uM Fentanyl + 0.05% Formalin	Treatment	13	0.0284345
81	4uM CTAP + 3uM Fentanyl + 0.05% Formalin	Treatment	14	0.0406753
81	4uM CTAP + 3uM Fentanyl + 0.05% Formalin	Treatment	15	0.0343653
81	4uM CTAP + 3uM Fentanyl + 0.05% Formalin	Treatment	16	0.020887
81	4uM CTAP + 3uM Fentanyl + 0.05% Formalin	Treatment	17	0.0234365
81	4uM CTAP + 3uM Fentanyl + 0.05% Formalin	Treatment	18	0.0226313
81	4uM CTAP + 3uM Fentanyl + 0.05% Formalin	Treatment	19	0.0219575
81	4uM CTAP + 3uM Fentanyl + 0.05% Formalin	Treatment	20	0.0235738
82	4uM CTAP + 3uM Fentanyl + 0.05% Formalin	Baseline	0	0.386617
82	4uM CTAP + 3uM Fentanyl + 0.05% Formalin	Treatment	1	0.175013
82	4uM CTAP + 3uM Fentanyl + 0.05% Formalin	Treatment	2	0.189352
82	4uM CTAP + 3uM Fentanyl + 0.05% Formalin	Treatment	3	0.23581
82	4uM CTAP + 3uM Fentanyl + 0.05% Formalin	Treatment	4	0.188402
82	4uM CTAP + 3uM Fentanyl + 0.05% Formalin	Treatment	5	0.0929782
82	4uM CTAP + 3uM Fentanyl + 0.05% Formalin	Treatment	6	0.0988678
82	4uM CTAP + 3uM Fentanyl + 0.05% Formalin	Treatment	7	0.074989
82	4uM CTAP + 3uM Fentanyl + 0.05% Formalin	Treatment	8	0.0688862
82	4uM CTAP + 3uM Fentanyl + 0.05% Formalin	Treatment	9	0.056189
82	4uM CTAP + 3uM Fentanyl + 0.05% Formalin	Treatment	10	0.0573817
82	4uM CTAP + 3uM Fentanyl + 0.05% Formalin	Treatment	11	0.0557645
82	4uM CTAP + 3uM Fentanyl + 0.05% Formalin	Treatment	12	0.0758788
82	4uM CTAP + 3uM Fentanyl + 0.05% Formalin	Treatment	13	0.0919637
82	4uM CTAP + 3uM Fentanyl + 0.05% Formalin	Treatment	14	0.115012
82	4uM CTAP + 3uM Fentanyl + 0.05% Formalin	Treatment	15	0.119806
82	4uM CTAP + 3uM Fentanyl + 0.05% Formalin	Treatment	16	0.107778
82	4uM CTAP + 3uM Fentanyl + 0.05% Formalin	Treatment	17	0.0902197
82	4uM CTAP + 3uM Fentanyl + 0.05% Formalin	Treatment	18	0.0920152
82	4uM CTAP + 3uM Fentanyl + 0.05% Formalin	Treatment	19	0.094836
82	4uM CTAP + 3uM Fentanyl + 0.05% Formalin	Treatment	20	0.0842925
83	4uM CTAP + 3uM Fentanyl + 0.05% Formalin	Baseline	0	0.651392
83	4uM CTAP + 3uM Fentanyl + 0.05% Formalin	Treatment	1	0.65016
83	4uM CTAP + 3uM Fentanyl + 0.05% Formalin	Treatment	2	1.322
83	4uM CTAP + 3uM Fentanyl + 0.05% Formalin	Treatment	3	2.08078
83	4uM CTAP + 3uM Fentanyl + 0.05% Formalin	Treatment	4	1.96085
83	4uM CTAP + 3uM Fentanyl + 0.05% Formalin	Treatment	5	1.77575
83	4uM CTAP + 3uM Fentanyl + 0.05% Formalin	Treatment	6	1.11043
83	4uM CTAP + 3uM Fentanyl + 0.05% Formalin	Treatment	7	1.85777
83	4uM CTAP + 3uM Fentanyl + 0.05% Formalin	Treatment	8	0.999703
83	4uM CTAP + 3uM Fentanyl + 0.05% Formalin	Treatment	9	0.835337
83	4uM CTAP + 3uM Fentanyl + 0.05% Formalin	Treatment	10	0.724452
83	4uM CTAP + 3uM Fentanyl + 0.05% Formalin	Treatment	11	0.542732
83	4uM CTAP + 3uM Fentanyl + 0.05% Formalin	Treatment	12	0.509827
83	4uM CTAP + 3uM Fentanyl + 0.05% Formalin	Treatment	13	0.268932
83	4uM CTAP + 3uM Fentanyl + 0.05% Formalin	Treatment	14	0.211012
83	4uM CTAP + 3uM Fentanyl + 0.05% Formalin	Treatment	15	0.143379
83	4uM CTAP + 3uM Fentanyl + 0.05% Formalin	Treatment	16	0.110543
83	4uM CTAP + 3uM Fentanyl + 0.05% Formalin	Treatment	17	0.0373723
83	4uM CTAP + 3uM Fentanyl + 0.05% Formalin	Treatment	18	0.0344157
83	4uM CTAP + 3uM Fentanyl + 0.05% Formalin	Treatment	19	0.0316903
83	4uM CTAP + 3uM Fentanyl + 0.05% Formalin	Treatment	20	0.034961
84	4uM CTAP + 3uM Fentanyl + 0.05% Formalin	Baseline	0	0.999905
84	4uM CTAP + 3uM Fentanyl + 0.05% Formalin	Treatment	1	1.04019
84	4uM CTAP + 3uM Fentanyl + 0.05% Formalin	Treatment	2	1.19458
84	4uM CTAP + 3uM Fentanyl + 0.05% Formalin	Treatment	3	1.13013
84	4uM CTAP + 3uM Fentanyl + 0.05% Formalin	Treatment	4	1.83395
84	4uM CTAP + 3uM Fentanyl + 0.05% Formalin	Treatment	5	3.48258
84	4uM CTAP + 3uM Fentanyl + 0.05% Formalin	Treatment	6	2.09733
84	4uM CTAP + 3uM Fentanyl + 0.05% Formalin	Treatment	7	2.28923
84	4uM CTAP + 3uM Fentanyl + 0.05% Formalin	Treatment	8	2.40212
84	4uM CTAP + 3uM Fentanyl + 0.05% Formalin	Treatment	9	1.90618
84	4uM CTAP + 3uM Fentanyl + 0.05% Formalin	Treatment	10	1.67647
84	4uM CTAP + 3uM Fentanyl + 0.05% Formalin	Treatment	11	1.50584
84	4uM CTAP + 3uM Fentanyl + 0.05% Formalin	Treatment	12	1.03869
84	4uM CTAP + 3uM Fentanyl + 0.05% Formalin	Treatment	13	0.748347
84	4uM CTAP + 3uM Fentanyl + 0.05% Formalin	Treatment	14	0.951653
84	4uM CTAP + 3uM Fentanyl + 0.05% Formalin	Treatment	15	0.541418
84	4uM CTAP + 3uM Fentanyl + 0.05% Formalin	Treatment	16	0.164196
84	4uM CTAP + 3uM Fentanyl + 0.05% Formalin	Treatment	17	0.705278
84	4uM CTAP + 3uM Fentanyl + 0.05% Formalin	Treatment	18	0.218573
84	4uM CTAP + 3uM Fentanyl + 0.05% Formalin	Treatment	19	0.28361
84	4uM CTAP + 3uM Fentanyl + 0.05% Formalin	Treatment	20	0.183948
85	4uM CTAP + 3uM Fentanyl + 0.05% Formalin	Baseline	0	0.863906
85	4uM CTAP + 3uM Fentanyl + 0.05% Formalin	Treatment	1	0.887807
85	4uM CTAP + 3uM Fentanyl + 0.05% Formalin	Treatment	2	0.571143
85	4uM CTAP + 3uM Fentanyl + 0.05% Formalin	Treatment	3	0.231478
85	4uM CTAP + 3uM Fentanyl + 0.05% Formalin	Treatment	4	1.35265
85	4uM CTAP + 3uM Fentanyl + 0.05% Formalin	Treatment	5	1.48263
85	4uM CTAP + 3uM Fentanyl + 0.05% Formalin	Treatment	6	1.59213
85	4uM CTAP + 3uM Fentanyl + 0.05% Formalin	Treatment	7	0.859723
85	4uM CTAP + 3uM Fentanyl + 0.05% Formalin	Treatment	8	0.698943
85	4uM CTAP + 3uM Fentanyl + 0.05% Formalin	Treatment	9	0.631202
85	4uM CTAP + 3uM Fentanyl + 0.05% Formalin	Treatment	10	0.498863
85	4uM CTAP + 3uM Fentanyl + 0.05% Formalin	Treatment	11	0.476255
85	4uM CTAP + 3uM Fentanyl + 0.05% Formalin	Treatment	12	0.823082
85	4uM CTAP + 3uM Fentanyl + 0.05% Formalin	Treatment	13	0.345313
85	4uM CTAP + 3uM Fentanyl + 0.05% Formalin	Treatment	14	0.305052
85	4uM CTAP + 3uM Fentanyl + 0.05% Formalin	Treatment	15	0.202585
85	4uM CTAP + 3uM Fentanyl + 0.05% Formalin	Treatment	16	0.206443
85	4uM CTAP + 3uM Fentanyl + 0.05% Formalin	Treatment	17	0.0495973
85	4uM CTAP + 3uM Fentanyl + 0.05% Formalin	Treatment	18	0.0497902
85	4uM CTAP + 3uM Fentanyl + 0.05% Formalin	Treatment	19	0.0491605
85	4uM CTAP + 3uM Fentanyl + 0.05% Formalin	Treatment	20	0.0515653
86	4uM CTAP + 3uM Fentanyl + 0.05% Formalin	Baseline	0	0.56731
86	4uM CTAP + 3uM Fentanyl + 0.05% Formalin	Treatment	1	1.22218
86	4uM CTAP + 3uM Fentanyl + 0.05% Formalin	Treatment	2	0.451668
86	4uM CTAP + 3uM Fentanyl + 0.05% Formalin	Treatment	3	0.669172
86	4uM CTAP + 3uM Fentanyl + 0.05% Formalin	Treatment	4	0.595997
86	4uM CTAP + 3uM Fentanyl + 0.05% Formalin	Treatment	5	0.579545
86	4uM CTAP + 3uM Fentanyl + 0.05% Formalin	Treatment	6	1.04546
86	4uM CTAP + 3uM Fentanyl + 0.05% Formalin	Treatment	7	1.07557
86	4uM CTAP + 3uM Fentanyl + 0.05% Formalin	Treatment	8	1.07084
86	4uM CTAP + 3uM Fentanyl + 0.05% Formalin	Treatment	9	0.827932
86	4uM CTAP + 3uM Fentanyl + 0.05% Formalin	Treatment	10	1.0403
86	4uM CTAP + 3uM Fentanyl + 0.05% Formalin	Treatment	11	0.470922
86	4uM CTAP + 3uM Fentanyl + 0.05% Formalin	Treatment	12	0.413662
86	4uM CTAP + 3uM Fentanyl + 0.05% Formalin	Treatment	13	0.48634
86	4uM CTAP + 3uM Fentanyl + 0.05% Formalin	Treatment	14	0.228883
86	4uM CTAP + 3uM Fentanyl + 0.05% Formalin	Treatment	15	0.209212
86	4uM CTAP + 3uM Fentanyl + 0.05% Formalin	Treatment	16	0.167547
86	4uM CTAP + 3uM Fentanyl + 0.05% Formalin	Treatment	17	0.0520708
86	4uM CTAP + 3uM Fentanyl + 0.05% Formalin	Treatment	18	0.0453175
86	4uM CTAP + 3uM Fentanyl + 0.05% Formalin	Treatment	19	0.0466933
86	4uM CTAP + 3uM Fentanyl + 0.05% Formalin	Treatment	20	0.0519648
87	4uM CTAP + 3uM Fentanyl + 0.05% Formalin	Baseline	0	0.847435
87	4uM CTAP + 3uM Fentanyl + 0.05% Formalin	Treatment	1	2.41685
87	4uM CTAP + 3uM Fentanyl + 0.05% Formalin	Treatment	2	0.219765
87	4uM CTAP + 3uM Fentanyl + 0.05% Formalin	Treatment	3	1.94198
87	4uM CTAP + 3uM Fentanyl + 0.05% Formalin	Treatment	4	1.60223
87	4uM CTAP + 3uM Fentanyl + 0.05% Formalin	Treatment	5	1.25933
87	4uM CTAP + 3uM Fentanyl + 0.05% Formalin	Treatment	6	0.947903
87	4uM CTAP + 3uM Fentanyl + 0.05% Formalin	Treatment	7	0.311638
87	4uM CTAP + 3uM Fentanyl + 0.05% Formalin	Treatment	8	1.88667
87	4uM CTAP + 3uM Fentanyl + 0.05% Formalin	Treatment	9	0.938212
87	4uM CTAP + 3uM Fentanyl + 0.05% Formalin	Treatment	10	0.593545
87	4uM CTAP + 3uM Fentanyl + 0.05% Formalin	Treatment	11	0.695683
87	4uM CTAP + 3uM Fentanyl + 0.05% Formalin	Treatment	12	0.417315
87	4uM CTAP + 3uM Fentanyl + 0.05% Formalin	Treatment	13	0.519987
87	4uM CTAP + 3uM Fentanyl + 0.05% Formalin	Treatment	14	0.374365
87	4uM CTAP + 3uM Fentanyl + 0.05% Formalin	Treatment	15	0.155005
87	4uM CTAP + 3uM Fentanyl + 0.05% Formalin	Treatment	16	0.115748
87	4uM CTAP + 3uM Fentanyl + 0.05% Formalin	Treatment	17	0.188137
87	4uM CTAP + 3uM Fentanyl + 0.05% Formalin	Treatment	18	0.0773702
87	4uM CTAP + 3uM Fentanyl + 0.05% Formalin	Treatment	19	0.0722942
87	4uM CTAP + 3uM Fentanyl + 0.05% Formalin	Treatment	20	0.0459168
88	4uM CTAP + 3uM Fentanyl + 0.05% Formalin	Baseline	0	0.187971
88	4uM CTAP + 3uM Fentanyl + 0.05% Formalin	Treatment	1	0.471885
88	4uM CTAP + 3uM Fentanyl + 0.05% Formalin	Treatment	2	1.27974
88	4uM CTAP + 3uM Fentanyl + 0.05% Formalin	Treatment	3	0.39912
88	4uM CTAP + 3uM Fentanyl + 0.05% Formalin	Treatment	4	0.676482
88	4uM CTAP + 3uM Fentanyl + 0.05% Formalin	Treatment	5	1.14965
88	4uM CTAP + 3uM Fentanyl + 0.05% Formalin	Treatment	6	0.433233
88	4uM CTAP + 3uM Fentanyl + 0.05% Formalin	Treatment	7	0.62823
88	4uM CTAP + 3uM Fentanyl + 0.05% Formalin	Treatment	8	0.263618
88	4uM CTAP + 3uM Fentanyl + 0.05% Formalin	Treatment	9	0.202428
88	4uM CTAP + 3uM Fentanyl + 0.05% Formalin	Treatment	10	0.411468
88	4uM CTAP + 3uM Fentanyl + 0.05% Formalin	Treatment	11	0.240015
88	4uM CTAP + 3uM Fentanyl + 0.05% Formalin	Treatment	12	0.221338
88	4uM CTAP + 3uM Fentanyl + 0.05% Formalin	Treatment	13	0.312675
88	4uM CTAP + 3uM Fentanyl + 0.05% Formalin	Treatment	14	0.161477
88	4uM CTAP + 3uM Fentanyl + 0.05% Formalin	Treatment	15	0.132169
88	4uM CTAP + 3uM Fentanyl + 0.05% Formalin	Treatment	16	0.0689893
88	4uM CTAP + 3uM Fentanyl + 0.05% Formalin	Treatment	17	0.0674407
88	4uM CTAP + 3uM Fentanyl + 0.05% Formalin	Treatment	18	0.0565942
88	4uM CTAP + 3uM Fentanyl + 0.05% Formalin	Treatment	19	0.0462868
88	4uM CTAP + 3uM Fentanyl + 0.05% Formalin	Treatment	20	0.0351657
89	4uM CTAP + 3uM Fentanyl + 0.05% Formalin	Baseline	0	0.771785
89	4uM CTAP + 3uM Fentanyl + 0.05% Formalin	Treatment	1	0.145348
89	4uM CTAP + 3uM Fentanyl + 0.05% Formalin	Treatment	2	0.0744857
89	4uM CTAP + 3uM Fentanyl + 0.05% Formalin	Treatment	3	0.117801
89	4uM CTAP + 3uM Fentanyl + 0.05% Formalin	Treatment	4	0.311963
89	4uM CTAP + 3uM Fentanyl + 0.05% Formalin	Treatment	5	0.384217
89	4uM CTAP + 3uM Fentanyl + 0.05% Formalin	Treatment	6	0.321198
89	4uM CTAP + 3uM Fentanyl + 0.05% Formalin	Treatment	7	0.264713
89	4uM CTAP + 3uM Fentanyl + 0.05% Formalin	Treatment	8	0.224195
89	4uM CTAP + 3uM Fentanyl + 0.05% Formalin	Treatment	9	0.162846
89	4uM CTAP + 3uM Fentanyl + 0.05% Formalin	Treatment	10	0.183158
89	4uM CTAP + 3uM Fentanyl + 0.05% Formalin	Treatment	11	0.173248
89	4uM CTAP + 3uM Fentanyl + 0.05% Formalin	Treatment	12	0.116267
89	4uM CTAP + 3uM Fentanyl + 0.05% Formalin	Treatment	13	0.117836
89	4uM CTAP + 3uM Fentanyl + 0.05% Formalin	Treatment	14	0.125629
89	4uM CTAP + 3uM Fentanyl + 0.05% Formalin	Treatment	15	0.165591
89	4uM CTAP + 3uM Fentanyl + 0.05% Formalin	Treatment	16	0.0886912
89	4uM CTAP + 3uM Fentanyl + 0.05% Formalin	Treatment	17	0.127183
89	4uM CTAP + 3uM Fentanyl + 0.05% Formalin	Treatment	18	0.0902117
89	4uM CTAP + 3uM Fentanyl + 0.05% Formalin	Treatment	19	0.0834543
89	4uM CTAP + 3uM Fentanyl + 0.05% Formalin	Treatment	20	0.110248
90	5uM Naloxone + 3uM Fentanyl + 0.05% Formalin	Baseline	0	1.16095
90	5uM Naloxone + 3uM Fentanyl + 0.05% Formalin	Treatment	1	4.97578
90	5uM Naloxone + 3uM Fentanyl + 0.05% Formalin	Treatment	2	4.11098
90	5uM Naloxone + 3uM Fentanyl + 0.05% Formalin	Treatment	3	2.2992
90	5uM Naloxone + 3uM Fentanyl + 0.05% Formalin	Treatment	4	2.24025
90	5uM Naloxone + 3uM Fentanyl + 0.05% Formalin	Treatment	5	1.09878
90	5uM Naloxone + 3uM Fentanyl + 0.05% Formalin	Treatment	6	0.446743
90	5uM Naloxone + 3uM Fentanyl + 0.05% Formalin	Treatment	7	0.311878
90	5uM Naloxone + 3uM Fentanyl + 0.05% Formalin	Treatment	8	0.193605
90	5uM Naloxone + 3uM Fentanyl + 0.05% Formalin	Treatment	9	0.0812712
90	5uM Naloxone + 3uM Fentanyl + 0.05% Formalin	Treatment	10	0.0663805
90	5uM Naloxone + 3uM Fentanyl + 0.05% Formalin	Treatment	11	0.0411175
90	5uM Naloxone + 3uM Fentanyl + 0.05% Formalin	Treatment	12	0.0408028
90	5uM Naloxone + 3uM Fentanyl + 0.05% Formalin	Treatment	13	0.0539672
90	5uM Naloxone + 3uM Fentanyl + 0.05% Formalin	Treatment	14	0.0335407
90	5uM Naloxone + 3uM Fentanyl + 0.05% Formalin	Treatment	15	0.0382533
90	5uM Naloxone + 3uM Fentanyl + 0.05% Formalin	Treatment	16	0.0342005
90	5uM Naloxone + 3uM Fentanyl + 0.05% Formalin	Treatment	17	0.0357177
90	5uM Naloxone + 3uM Fentanyl + 0.05% Formalin	Treatment	18	0.0324847
90	5uM Naloxone + 3uM Fentanyl + 0.05% Formalin	Treatment	19	0.0356602
90	5uM Naloxone + 3uM Fentanyl + 0.05% Formalin	Treatment	20	0.0366387
91	5uM Naloxone + 3uM Fentanyl + 0.05% Formalin	Baseline	0	0.518368
91	5uM Naloxone + 3uM Fentanyl + 0.05% Formalin	Treatment	1	1.8494
91	5uM Naloxone + 3uM Fentanyl + 0.05% Formalin	Treatment	2	1.491
91	5uM Naloxone + 3uM Fentanyl + 0.05% Formalin	Treatment	3	1.29219
91	5uM Naloxone + 3uM Fentanyl + 0.05% Formalin	Treatment	4	0.960312
91	5uM Naloxone + 3uM Fentanyl + 0.05% Formalin	Treatment	5	0.538013
91	5uM Naloxone + 3uM Fentanyl + 0.05% Formalin	Treatment	6	0.322885
91	5uM Naloxone + 3uM Fentanyl + 0.05% Formalin	Treatment	7	0.321553
91	5uM Naloxone + 3uM Fentanyl + 0.05% Formalin	Treatment	8	0.0716015
91	5uM Naloxone + 3uM Fentanyl + 0.05% Formalin	Treatment	9	0.0586343
91	5uM Naloxone + 3uM Fentanyl + 0.05% Formalin	Treatment	10	0.03648
91	5uM Naloxone + 3uM Fentanyl + 0.05% Formalin	Treatment	11	0.0403337
91	5uM Naloxone + 3uM Fentanyl + 0.05% Formalin	Treatment	12	0.0421553
91	5uM Naloxone + 3uM Fentanyl + 0.05% Formalin	Treatment	13	0.0521502
91	5uM Naloxone + 3uM Fentanyl + 0.05% Formalin	Treatment	14	0.045356
91	5uM Naloxone + 3uM Fentanyl + 0.05% Formalin	Treatment	15	0.145277
91	5uM Naloxone + 3uM Fentanyl + 0.05% Formalin	Treatment	16	0.069953
91	5uM Naloxone + 3uM Fentanyl + 0.05% Formalin	Treatment	17	0.0552837
91	5uM Naloxone + 3uM Fentanyl + 0.05% Formalin	Treatment	18	0.0967437
91	5uM Naloxone + 3uM Fentanyl + 0.05% Formalin	Treatment	19	0.0749585
91	5uM Naloxone + 3uM Fentanyl + 0.05% Formalin	Treatment	20	0.0703188
92	5uM Naloxone + 3uM Fentanyl + 0.05% Formalin	Baseline	0	0.758165
92	5uM Naloxone + 3uM Fentanyl + 0.05% Formalin	Treatment	1	0.336878
92	5uM Naloxone + 3uM Fentanyl + 0.05% Formalin	Treatment	2	2.5575
92	5uM Naloxone + 3uM Fentanyl + 0.05% Formalin	Treatment	3	3.59222
92	5uM Naloxone + 3uM Fentanyl + 0.05% Formalin	Treatment	4	2.6865
92	5uM Naloxone + 3uM Fentanyl + 0.05% Formalin	Treatment	5	2.53517
92	5uM Naloxone + 3uM Fentanyl + 0.05% Formalin	Treatment	6	2.72245
92	5uM Naloxone + 3uM Fentanyl + 0.05% Formalin	Treatment	7	1.89633
92	5uM Naloxone + 3uM Fentanyl + 0.05% Formalin	Treatment	8	1.60187
92	5uM Naloxone + 3uM Fentanyl + 0.05% Formalin	Treatment	9	0.80911
92	5uM Naloxone + 3uM Fentanyl + 0.05% Formalin	Treatment	10	0.63753
92	5uM Naloxone + 3uM Fentanyl + 0.05% Formalin	Treatment	11	0.19654
92	5uM Naloxone + 3uM Fentanyl + 0.05% Formalin	Treatment	12	0.0728468
92	5uM Naloxone + 3uM Fentanyl + 0.05% Formalin	Treatment	13	0.057173
92	5uM Naloxone + 3uM Fentanyl + 0.05% Formalin	Treatment	14	0.0617998
92	5uM Naloxone + 3uM Fentanyl + 0.05% Formalin	Treatment	15	0.065664
92	5uM Naloxone + 3uM Fentanyl + 0.05% Formalin	Treatment	16	0.0503077
92	5uM Naloxone + 3uM Fentanyl + 0.05% Formalin	Treatment	17	0.0384813
92	5uM Naloxone + 3uM Fentanyl + 0.05% Formalin	Treatment	18	0.0245577
92	5uM Naloxone + 3uM Fentanyl + 0.05% Formalin	Treatment	19	0.0268925
92	5uM Naloxone + 3uM Fentanyl + 0.05% Formalin	Treatment	20	0.0216867
93	5uM Naloxone + 3uM Fentanyl + 0.05% Formalin	Baseline	0	0.266289
93	5uM Naloxone + 3uM Fentanyl + 0.05% Formalin	Treatment	1	2.29313
93	5uM Naloxone + 3uM Fentanyl + 0.05% Formalin	Treatment	2	1.36616
93	5uM Naloxone + 3uM Fentanyl + 0.05% Formalin	Treatment	3	1.0116
93	5uM Naloxone + 3uM Fentanyl + 0.05% Formalin	Treatment	4	0.634057
93	5uM Naloxone + 3uM Fentanyl + 0.05% Formalin	Treatment	5	0.396027
93	5uM Naloxone + 3uM Fentanyl + 0.05% Formalin	Treatment	6	0.282323
93	5uM Naloxone + 3uM Fentanyl + 0.05% Formalin	Treatment	7	0.388018
93	5uM Naloxone + 3uM Fentanyl + 0.05% Formalin	Treatment	8	0.141524
93	5uM Naloxone + 3uM Fentanyl + 0.05% Formalin	Treatment	9	0.0511307
93	5uM Naloxone + 3uM Fentanyl + 0.05% Formalin	Treatment	10	0.0489738
93	5uM Naloxone + 3uM Fentanyl + 0.05% Formalin	Treatment	11	0.0409098
93	5uM Naloxone + 3uM Fentanyl + 0.05% Formalin	Treatment	12	0.0524208
93	5uM Naloxone + 3uM Fentanyl + 0.05% Formalin	Treatment	13	0.0636813
93	5uM Naloxone + 3uM Fentanyl + 0.05% Formalin	Treatment	14	0.0816223
93	5uM Naloxone + 3uM Fentanyl + 0.05% Formalin	Treatment	15	0.072431
93	5uM Naloxone + 3uM Fentanyl + 0.05% Formalin	Treatment	16	0.0461105
93	5uM Naloxone + 3uM Fentanyl + 0.05% Formalin	Treatment	17	0.0201918
93	5uM Naloxone + 3uM Fentanyl + 0.05% Formalin	Treatment	18	0.0205157
93	5uM Naloxone + 3uM Fentanyl + 0.05% Formalin	Treatment	19	0.0294192
93	5uM Naloxone + 3uM Fentanyl + 0.05% Formalin	Treatment	20	0.03867
94	5uM Naloxone + 3uM Fentanyl + 0.05% Formalin	Baseline	0	0.35497
94	5uM Naloxone + 3uM Fentanyl + 0.05% Formalin	Treatment	1	1.86115
94	5uM Naloxone + 3uM Fentanyl + 0.05% Formalin	Treatment	2	2.3329
94	5uM Naloxone + 3uM Fentanyl + 0.05% Formalin	Treatment	3	3.17108
94	5uM Naloxone + 3uM Fentanyl + 0.05% Formalin	Treatment	4	3.94237
94	5uM Naloxone + 3uM Fentanyl + 0.05% Formalin	Treatment	5	4.13077
94	5uM Naloxone + 3uM Fentanyl + 0.05% Formalin	Treatment	6	4.89743
94	5uM Naloxone + 3uM Fentanyl + 0.05% Formalin	Treatment	7	4.74283
94	5uM Naloxone + 3uM Fentanyl + 0.05% Formalin	Treatment	8	3.6046
94	5uM Naloxone + 3uM Fentanyl + 0.05% Formalin	Treatment	9	2.56578
94	5uM Naloxone + 3uM Fentanyl + 0.05% Formalin	Treatment	10	2.54397
94	5uM Naloxone + 3uM Fentanyl + 0.05% Formalin	Treatment	11	1.81407
94	5uM Naloxone + 3uM Fentanyl + 0.05% Formalin	Treatment	12	0.61971
94	5uM Naloxone + 3uM Fentanyl + 0.05% Formalin	Treatment	13	0.588903
94	5uM Naloxone + 3uM Fentanyl + 0.05% Formalin	Treatment	14	0.649635
94	5uM Naloxone + 3uM Fentanyl + 0.05% Formalin	Treatment	15	0.279032
94	5uM Naloxone + 3uM Fentanyl + 0.05% Formalin	Treatment	16	0.328223
94	5uM Naloxone + 3uM Fentanyl + 0.05% Formalin	Treatment	17	0.268248
94	5uM Naloxone + 3uM Fentanyl + 0.05% Formalin	Treatment	18	0.0868852
94	5uM Naloxone + 3uM Fentanyl + 0.05% Formalin	Treatment	19	0.131944
94	5uM Naloxone + 3uM Fentanyl + 0.05% Formalin	Treatment	20	0.057229
95	5uM Naloxone + 3uM Fentanyl + 0.05% Formalin	Baseline	0	0.303619
95	5uM Naloxone + 3uM Fentanyl + 0.05% Formalin	Treatment	1	3.31522
95	5uM Naloxone + 3uM Fentanyl + 0.05% Formalin	Treatment	2	4.51003
95	5uM Naloxone + 3uM Fentanyl + 0.05% Formalin	Treatment	3	3.55007
95	5uM Naloxone + 3uM Fentanyl + 0.05% Formalin	Treatment	4	2.76523
95	5uM Naloxone + 3uM Fentanyl + 0.05% Formalin	Treatment	5	2.15992
95	5uM Naloxone + 3uM Fentanyl + 0.05% Formalin	Treatment	6	1.22195
95	5uM Naloxone + 3uM Fentanyl + 0.05% Formalin	Treatment	7	0.524833
95	5uM Naloxone + 3uM Fentanyl + 0.05% Formalin	Treatment	8	0.32989
95	5uM Naloxone + 3uM Fentanyl + 0.05% Formalin	Treatment	9	0.218692
95	5uM Naloxone + 3uM Fentanyl + 0.05% Formalin	Treatment	10	0.0974853
95	5uM Naloxone + 3uM Fentanyl + 0.05% Formalin	Treatment	11	0.0502508
95	5uM Naloxone + 3uM Fentanyl + 0.05% Formalin	Treatment	12	0.038046
95	5uM Naloxone + 3uM Fentanyl + 0.05% Formalin	Treatment	13	0.0356483
95	5uM Naloxone + 3uM Fentanyl + 0.05% Formalin	Treatment	14	0.0286278
95	5uM Naloxone + 3uM Fentanyl + 0.05% Formalin	Treatment	15	0.0293693
95	5uM Naloxone + 3uM Fentanyl + 0.05% Formalin	Treatment	16	0.0320482
95	5uM Naloxone + 3uM Fentanyl + 0.05% Formalin	Treatment	17	0.033156
95	5uM Naloxone + 3uM Fentanyl + 0.05% Formalin	Treatment	18	0.0285728
95	5uM Naloxone + 3uM Fentanyl + 0.05% Formalin	Treatment	19	0.03065
95	5uM Naloxone + 3uM Fentanyl + 0.05% Formalin	Treatment	20	0.0321305
96	5uM Naloxone + 3uM Fentanyl + 0.05% Formalin	Baseline	0	0.41358
96	5uM Naloxone + 3uM Fentanyl + 0.05% Formalin	Treatment	1	5.17768
96	5uM Naloxone + 3uM Fentanyl + 0.05% Formalin	Treatment	2	3.59123
96	5uM Naloxone + 3uM Fentanyl + 0.05% Formalin	Treatment	3	2.3771
[truncated: 1,550 more rows]

## Sheet: Figure5D
Animal #	Group	Condition	Swimming velocity	Angular velocity	Velocity (crit)	Angle (crit)
1	Control (embryo water)	Baseline	0.423724	1858.41
2	Control (embryo water)	Baseline	0.764157	1371.99
3	Control (embryo water)	Baseline	1.20446	1280.32
5	Control (embryo water)	Baseline	0.338299	1541.92
6	Control (embryo water)	Baseline	0.25718	1709.72
7	Control (embryo water)	Baseline	0.940862	1388.46
8	Control (embryo water)	Baseline	0.260993	1814.23
9	Control (embryo water)	Baseline	0.526507	1452.11
10	Control (embryo water)	Baseline	0.596759	1669.19
11	Control (embryo water)	Baseline	0.406077	1562.13
12	Control (embryo water)	Baseline	0.181805	1587.39
13	Control (embryo water)	Baseline	0.864791	1363.01
14	Control (embryo water)	Baseline	0.271959	1814.5
15	Control (embryo water)	Baseline	0.523166	1715.18
16	Control (embryo water)	Baseline	0.293803	1551.95
17	Control (embryo water)	Baseline	1.42022	1090.68
18	Control (embryo water)	Baseline	0.125426	1680.24
19	Control (embryo water)	Baseline	0.472328	1457.35
20	Control (embryo water)	Baseline	0.415735	1354.06
21	Control (embryo water)	Baseline	0.507775	1048.85
22	Control (embryo water)	Baseline	0.3252	1324.59
23	Control (embryo water)	Baseline	0.956088	1201.04
1	Control (embryo water)	Treatment	0.165402	1647.68	0.165402	1647.68
2	Control (embryo water)	Treatment	0.294749	1699.57	0.294749	1699.57
3	Control (embryo water)	Treatment	0.0945856	2258.23	0.0945856	2258.23
5	Control (embryo water)	Treatment	0.85884	1476.48	0.85884	1476.48
6	Control (embryo water)	Treatment	0.280477	1657.12	0.280477	1657.12
7	Control (embryo water)	Treatment	0.123682	1707.6	0.123682	1707.6
8	Control (embryo water)	Treatment	0.246181	1713.94	0.246181	1713.94
9	Control (embryo water)	Treatment	0.307893	1678.97	0.307893	1678.97
10	Control (embryo water)	Treatment	0.0620558	1889.51	0.0620558	1889.51
11	Control (embryo water)	Treatment	0.599407	1241.24	0.599407	1241.24
12	Control (embryo water)	Treatment	0.333297	1553.39	0.333297	1553.39
13	Control (embryo water)	Treatment	1.29326	1088.98	1.29326	1088.98
14	Control (embryo water)	Treatment	0.267197	1532.05	0.267197	1532.05
15	Control (embryo water)	Treatment	0.322315	2090.26	0.322315	2090.26
16	Control (embryo water)	Treatment	0.387748	1614.82	0.387748	1614.82
17	Control (embryo water)	Treatment	0.965222	1147.33	0.965222	1147.33
18	Control (embryo water)	Treatment	0.119844	1513.61	0.119844	1513.61
19	Control (embryo water)	Treatment	0.71752	1321.68	0.71752	1321.68
20	Control (embryo water)	Treatment	0.832529	1106.79	0.832529	1106.79
21	Control (embryo water)	Treatment	0.447109	960.454	0.447109	960.454
22	Control (embryo water)	Treatment	0.0848074	1054.79	0.0848074	1054.79
23	Control (embryo water)	Treatment	1.00393	1198.21	1.00393	1198.21
24	0.05% Formalin	Baseline	0.101841	1795.74
25	0.05% Formalin	Baseline	1.52495	1123.8
26	0.05% Formalin	Baseline	0.282726	1518.25
27	0.05% Formalin	Baseline	0.278009	1627.53
29	0.05% Formalin	Baseline	0.992983	1535.88
30	0.05% Formalin	Baseline	0.772588	1408.75
31	0.05% Formalin	Baseline	0.13197	2054.31
32	0.05% Formalin	Baseline	0.592738	1832.61
33	0.05% Formalin	Baseline	0.637352	1542.53
34	0.05% Formalin	Baseline	0.351893	1786.37
35	0.05% Formalin	Baseline	1.32574	976.514
36	0.05% Formalin	Baseline	0.692806	1267.32
37	0.05% Formalin	Baseline	1.65556	773.008
38	0.05% Formalin	Baseline	0.315592	1406.43
39	0.05% Formalin	Baseline	1.02038	957.726
40	0.05% Formalin	Baseline	0.70009	1317.5
41	0.05% Formalin	Baseline	0.716737	1240.28
42	0.05% Formalin	Baseline	0.901034	1307.64
43	0.05% Formalin	Baseline	0.315645	1365.11
44	0.05% Formalin	Baseline	0.739832	1575.21
45	0.05% Formalin	Baseline	0.561347	1245.12
24	0.05% Formalin	Treatment	2.02819	1126.41	2.02819	1126.41
25	0.05% Formalin	Treatment	4.03354	929.115	4.03354	929.115
26	0.05% Formalin	Treatment	2.95676	1062.58	2.95676	1062.58
27	0.05% Formalin	Treatment	2.7237	1062.02	2.7237	1062.02
29	0.05% Formalin	Treatment	3.16299	1262.25	3.16299	1262.25
30	0.05% Formalin	Treatment	0.769189	1797.75	0.769189	1797.75
31	0.05% Formalin	Treatment	0.712623	2001.7	0.712623	2001.7
32	0.05% Formalin	Treatment	1.85916	1417.54	1.85916	1417.54
33	0.05% Formalin	Treatment	2.96871	1377.24	2.96871	1377.24
34	0.05% Formalin	Treatment	3.12768	1064.69	3.12768	1064.69
35	0.05% Formalin	Treatment	2.72117	1097.19	2.72117	1097.19
36	0.05% Formalin	Treatment	3.91353	754.569	3.91353	754.569
37	0.05% Formalin	Treatment	2.40199	905.513	2.40199	905.513
38	0.05% Formalin	Treatment	1.87975	837.142	1.87975	837.142
39	0.05% Formalin	Treatment	2.72621	1032.5	2.72621	1032.5
40	0.05% Formalin	Treatment	2.09069	913.707	2.09069	913.707
41	0.05% Formalin	Treatment	2.566	943.381	2.566	943.381
42	0.05% Formalin	Treatment	1.30364	1028.95	1.30364	1028.95
43	0.05% Formalin	Treatment	3.25903	869.306	3.25903	869.306
44	0.05% Formalin	Treatment	0.601536	1478.28	0.601536	1478.28
45	0.05% Formalin	Treatment	2.40957	868.151	2.40957	868.151
46	0.05% Formalin + 3uM Fentanyl	Baseline	1.00805	1255.74
47	0.05% Formalin + 3uM Fentanyl	Baseline	0.521796	1464.23
48	0.05% Formalin + 3uM Fentanyl	Baseline	0.180876	1711.44
49	0.05% Formalin + 3uM Fentanyl	Baseline	0.594797	1598.52
50	0.05% Formalin + 3uM Fentanyl	Baseline	0.675687	1433.92
51	0.05% Formalin + 3uM Fentanyl	Baseline	1.01116	1491.35
52	0.05% Formalin + 3uM Fentanyl	Baseline	0.676893	1578.76
53	0.05% Formalin + 3uM Fentanyl	Baseline	0.994682	1184.52
54	0.05% Formalin + 3uM Fentanyl	Baseline	0.894049	1270.82
55	0.05% Formalin + 3uM Fentanyl	Baseline	1.06771	1477.32
56	0.05% Formalin + 3uM Fentanyl	Baseline	0.181529	1324.65
57	0.05% Formalin + 3uM Fentanyl	Baseline	0.261255	1732.91
58	0.05% Formalin + 3uM Fentanyl	Baseline	0.347576	1361.55
59	0.05% Formalin + 3uM Fentanyl	Baseline	0.719513	1518.31
46	0.05% Formalin + 3uM Fentanyl	Treatment	0.188509	1860.6	0.188509	1860.6
47	0.05% Formalin + 3uM Fentanyl	Treatment	0.695284	1646.68	0.695284	1646.68
48	0.05% Formalin + 3uM Fentanyl	Treatment	2.04536	1064.38	2.04536	1064.38
49	0.05% Formalin + 3uM Fentanyl	Treatment	2.23497	1103.06	2.23497	1103.06
50	0.05% Formalin + 3uM Fentanyl	Treatment	1.56759	1430.44	1.56759	1430.44
51	0.05% Formalin + 3uM Fentanyl	Treatment	0.315561	1775.75	0.315561	1775.75
52	0.05% Formalin + 3uM Fentanyl	Treatment	0.651837	1577.3	0.651837	1577.3
53	0.05% Formalin + 3uM Fentanyl	Treatment	1.51734	1386.09	1.51734	1386.09
54	0.05% Formalin + 3uM Fentanyl	Treatment	1.09543	1340.73	1.09543	1340.73
55	0.05% Formalin + 3uM Fentanyl	Treatment	1.13312	1312.9	1.13312	1312.9
56	0.05% Formalin + 3uM Fentanyl	Treatment	0.0545951	1909.95	0.0545951	1909.95
57	0.05% Formalin + 3uM Fentanyl	Treatment	1.04351	1324.34	1.04351	1324.34
58	0.05% Formalin + 3uM Fentanyl	Treatment	1.05973	1133.56	1.05973	1133.56
59	0.05% Formalin + 3uM Fentanyl	Treatment	0.795398	1357.57	0.795398	1357.57
60	3uM Fentanyl	Baseline	0.691004	1451.58
61	3uM Fentanyl	Baseline	0.823275	1328.19
62	3uM Fentanyl	Baseline	0.911992	1168.13
63	3uM Fentanyl	Baseline	0.472645	1395.75
64	3uM Fentanyl	Baseline	0.735328	1437.74
65	3uM Fentanyl	Baseline	0.598071	1309.58
66	3uM Fentanyl	Baseline	0.360692	1759.4
67	3uM Fentanyl	Baseline	0.325008	1873.86
68	3uM Fentanyl	Baseline	1.06651	1458.29
70	3uM Fentanyl	Baseline	0.658149	1819.2
71	3uM Fentanyl	Baseline	0.127618	2029.7
72	3uM Fentanyl	Baseline	0.655799	1766.18
73	3uM Fentanyl	Baseline	0.195181	2126.18
60	3uM Fentanyl	Treatment	0.3111	1688.04	0.3111	1688.04
61	3uM Fentanyl	Treatment	0.203923	1863.51	0.203923	1863.51
62	3uM Fentanyl	Treatment	0.0911585	2036.44	0.0911585	2036.44
63	3uM Fentanyl	Treatment	0.398398	1678.59	0.398398	1678.59
64	3uM Fentanyl	Treatment	0.894529	1389.51	0.894529	1389.51
65	3uM Fentanyl	Treatment	0.705783	1463.72	0.705783	1463.72
66	3uM Fentanyl	Treatment	0.229799	2095.67	0.229799	2095.67
67	3uM Fentanyl	Treatment	1.67909	1409.02	1.67909	1409.02
68	3uM Fentanyl	Treatment	1.24054	1476.75	1.24054	1476.75
70	3uM Fentanyl	Treatment	0.136444	2408.23	0.136444	2408.23
71	3uM Fentanyl	Treatment	0.0595452	2380.02	0.0595452	2380.02
72	3uM Fentanyl	Treatment	0.405868	2026.36	0.405868	2026.36
73	3uM Fentanyl	Treatment	0.529381	1958.64	0.529381	1958.64
90	5uM Naloxone + 3uM Fentanyl + 0.05% Formalin	Baseline	1.16095	1488.58
91	5uM Naloxone + 3uM Fentanyl + 0.05% Formalin	Baseline	0.518368	1487.08
92	5uM Naloxone + 3uM Fentanyl + 0.05% Formalin	Baseline	0.758165	1255.95
93	5uM Naloxone + 3uM Fentanyl + 0.05% Formalin	Baseline	0.266289	1477.21
94	5uM Naloxone + 3uM Fentanyl + 0.05% Formalin	Baseline	0.35497	1436.25
95	5uM Naloxone + 3uM Fentanyl + 0.05% Formalin	Baseline	0.303619	1840.24
96	5uM Naloxone + 3uM Fentanyl + 0.05% Formalin	Baseline	0.41358	1584.68
97	5uM Naloxone + 3uM Fentanyl + 0.05% Formalin	Baseline	1.45586	1010.46
98	5uM Naloxone + 3uM Fentanyl + 0.05% Formalin	Baseline	0.882123	1115.86
99	5uM Naloxone + 3uM Fentanyl + 0.05% Formalin	Baseline	0.610717	1320.86
100	5uM Naloxone + 3uM Fentanyl + 0.05% Formalin	Baseline	0.480977	1590.7
101	5uM Naloxone + 3uM Fentanyl + 0.05% Formalin	Baseline	0.979705	1758.98
102	5uM Naloxone + 3uM Fentanyl + 0.05% Formalin	Baseline	0.307228	1897.7
103	5uM Naloxone + 3uM Fentanyl + 0.05% Formalin	Baseline	0.999818	1647.99
104	5uM Naloxone + 3uM Fentanyl + 0.05% Formalin	Baseline	1.53579	831.048
105	5uM Naloxone + 3uM Fentanyl + 0.05% Formalin	Baseline	0.544267	1888.82
90	5uM Naloxone + 3uM Fentanyl + 0.05% Formalin	Treatment	3.79532	1014.47	3.79532	1014.47
91	5uM Naloxone + 3uM Fentanyl + 0.05% Formalin	Treatment	1.5442	1226.58	1.5442	1226.58
92	5uM Naloxone + 3uM Fentanyl + 0.05% Formalin	Treatment	2.1622	1168.21	2.1622	1168.21
93	5uM Naloxone + 3uM Fentanyl + 0.05% Formalin	Treatment	1.55696	1313.33	1.55696	1313.33
94	5uM Naloxone + 3uM Fentanyl + 0.05% Formalin	Treatment	2.45504	1023.23	2.45504	1023.23
95	5uM Naloxone + 3uM Fentanyl + 0.05% Formalin	Treatment	3.79177	917.28	3.79177	917.28
96	5uM Naloxone + 3uM Fentanyl + 0.05% Formalin	Treatment	3.71534	905.417	3.71534	905.417
97	5uM Naloxone + 3uM Fentanyl + 0.05% Formalin	Treatment	3.51244	811.378	3.51244	811.378
98	5uM Naloxone + 3uM Fentanyl + 0.05% Formalin	Treatment	1.28704	1327.31	1.28704	1327.31
99	5uM Naloxone + 3uM Fentanyl + 0.05% Formalin	Treatment	0.932421	1223.62	0.932421	1223.62
100	5uM Naloxone + 3uM Fentanyl + 0.05% Formalin	Treatment	0.430505	1513.42	0.430505	1513.42
101	5uM Naloxone + 3uM Fentanyl + 0.05% Formalin	Treatment	2.79432	1152.79	2.79432	1152.79
102	5uM Naloxone + 3uM Fentanyl + 0.05% Formalin	Treatment	1.57197	1409.36	1.57197	1409.36
103	5uM Naloxone + 3uM Fentanyl + 0.05% Formalin	Treatment	1.59719	1289.66	1.59719	1289.66
104	5uM Naloxone + 3uM Fentanyl + 0.05% Formalin	Treatment	1.70426	1057.29	1.70426	1057.29
105	5uM Naloxone + 3uM Fentanyl + 0.05% Formalin	Treatment	3.06543	1115.1	3.06543	1115.1
121	20uM Naloxone + 3uM Fentanyl + 0.05% Formalin	Baseline	0.377781	1304.43
122	20uM Naloxone + 3uM Fentanyl + 0.05% Formalin	Baseline	0.642187	1526.16
124	20uM Naloxone + 3uM Fentanyl + 0.05% Formalin	Baseline	0.170086	1853.23
125	20uM Naloxone + 3uM Fentanyl + 0.05% Formalin	Baseline	0.763233	1199.8
126	20uM Naloxone + 3uM Fentanyl + 0.05% Formalin	Baseline	0.390775	1574.3
129	20uM Naloxone + 3uM Fentanyl + 0.05% Formalin	Baseline	0.89428	1505.48
130	20uM Naloxone + 3uM Fentanyl + 0.05% Formalin	Baseline	0.342426	1541.32
131	20uM Naloxone + 3uM Fentanyl + 0.05% Formalin	Baseline	0.851565	1598.35
132	20uM Naloxone + 3uM Fentanyl + 0.05% Formalin	Baseline	1.33595	1473.25
133	20uM Naloxone + 3uM Fentanyl + 0.05% Formalin	Baseline	0.535631	1495.65
134	20uM Naloxone + 3uM Fentanyl + 0.05% Formalin	Baseline	0.906259	1171.6
135	20uM Naloxone + 3uM Fentanyl + 0.05% Formalin	Baseline	0.524206	994.205
136	20uM Naloxone + 3uM Fentanyl + 0.05% Formalin	Baseline	1.69757	933.537
137	20uM Naloxone + 3uM Fentanyl + 0.05% Formalin	Baseline	0.573873	1400.29
138	20uM Naloxone + 3uM Fentanyl + 0.05% Formalin	Baseline	0.157716	1355.29
140	20uM Naloxone + 3uM Fentanyl + 0.05% Formalin	Baseline	1.64299	1182.43
141	20uM Naloxone + 3uM Fentanyl + 0.05% Formalin	Baseline	0.976716	1451.63
142	20uM Naloxone + 3uM Fentanyl + 0.05% Formalin	Baseline	0.758316	1489.45
143	20uM Naloxone + 3uM Fentanyl + 0.05% Formalin	Baseline	0.152862	1732.3
144	20uM Naloxone + 3uM Fentanyl + 0.05% Formalin	Baseline	1.3778	1049.58
121	20uM Naloxone + 3uM Fentanyl + 0.05% Formalin	Treatment	3.16567	706.814	3.16567	706.814
122	20uM Naloxone + 3uM Fentanyl + 0.05% Formalin	Treatment	0.586864	1581.9	0.586864	1581.9
124	20uM Naloxone + 3uM Fentanyl + 0.05% Formalin	Treatment	1.32167	1352.45	1.32167	1352.45
125	20uM Naloxone + 3uM Fentanyl + 0.05% Formalin	Treatment	2.8986	838.886	2.8986	838.886
126	20uM Naloxone + 3uM Fentanyl + 0.05% Formalin	Treatment	3.36675	1011.17	3.36675	1011.17
129	20uM Naloxone + 3uM Fentanyl + 0.05% Formalin	Treatment	2.78496	1307.8	2.78496	1307.8
130	20uM Naloxone + 3uM Fentanyl + 0.05% Formalin	Treatment	4.30908	862.063	4.30908	862.063
131	20uM Naloxone + 3uM Fentanyl + 0.05% Formalin	Treatment	2.24781	1577.67	2.24781	1577.67
132	20uM Naloxone + 3uM Fentanyl + 0.05% Formalin	Treatment	3.14078	1313.58	3.14078	1313.58
133	20uM Naloxone + 3uM Fentanyl + 0.05% Formalin	Treatment	0.648938	1691.35	0.648938	1691.35
134	20uM Naloxone + 3uM Fentanyl + 0.05% Formalin	Treatment	3.01404	1097.74	3.01404	1097.74
135	20uM Naloxone + 3uM Fentanyl + 0.05% Formalin	Treatment	1.4104	1072.07	1.4104	1072.07
136	20uM Naloxone + 3uM Fentanyl + 0.05% Formalin	Treatment	2.66322	893.066	2.66322	893.066
137	20uM Naloxone + 3uM Fentanyl + 0.05% Formalin	Treatment	0.796384	1459.01	0.796384	1459.01
138	20uM Naloxone + 3uM Fentanyl + 0.05% Formalin	Treatment	2.35016	1245.21	2.35016	1245.21
140	20uM Naloxone + 3uM Fentanyl + 0.05% Formalin	Treatment	3.70187	1058.64	3.70187	1058.64
141	20uM Naloxone + 3uM Fentanyl + 0.05% Formalin	Treatment	0.514703	1817.18	0.514703	1817.18
142	20uM Naloxone + 3uM Fentanyl + 0.05% Formalin	Treatment	1.7867	1479.09	1.7867	1479.09
143	20uM Naloxone + 3uM Fentanyl + 0.05% Formalin	Treatment	2.21428	1252.82	2.21428	1252.82
144	20uM Naloxone + 3uM Fentanyl + 0.05% Formalin	Treatment	0.771467	1545.21	0.771467	1545.21
145	50uM Naloxone + 3uM Fentanyl + 0.05% Formalin	Baseline	0.905471	1449.71
146	50uM Naloxone + 3uM Fentanyl + 0.05% Formalin	Baseline	0.151645	1542.42
147	50uM Naloxone + 3uM Fentanyl + 0.05% Formalin	Baseline	0.13886	2059.41
148	50uM Naloxone + 3uM Fentanyl + 0.05% Formalin	Baseline	0.775131	1403.77
149	50uM Naloxone + 3uM Fentanyl + 0.05% Formalin	Baseline	1.12516	1163.43
150	50uM Naloxone + 3uM Fentanyl + 0.05% Formalin	Baseline	1.2721	1138.66
151	50uM Naloxone + 3uM Fentanyl + 0.05% Formalin	Baseline	1.0396	1378.33
152	50uM Naloxone + 3uM Fentanyl + 0.05% Formalin	Baseline	0.119662	1953.43
153	50uM Naloxone + 3uM Fentanyl + 0.05% Formalin	Baseline	0.385818	1795.26
154	50uM Naloxone + 3uM Fentanyl + 0.05% Formalin	Baseline	0.914291	1436.57
155	50uM Naloxone + 3uM Fentanyl + 0.05% Formalin	Baseline	0.631174	1590.15
156	50uM Naloxone + 3uM Fentanyl + 0.05% Formalin	Baseline	0.871023	1795.72
157	50uM Naloxone + 3uM Fentanyl + 0.05% Formalin	Baseline	1.37422	1173.53
158	50uM Naloxone + 3uM Fentanyl + 0.05% Formalin	Baseline	1.03829	1436.91
159	50uM Naloxone + 3uM Fentanyl + 0.05% Formalin	Baseline	1.36199	1122.53
160	50uM Naloxone + 3uM Fentanyl + 0.05% Formalin	Baseline	1.03329	1339.03
161	50uM Naloxone + 3uM Fentanyl + 0.05% Formalin	Baseline	1.02371	1240.48
162	50uM Naloxone + 3uM Fentanyl + 0.05% Formalin	Baseline	1.87997	911.627
163	50uM Naloxone + 3uM Fentanyl + 0.05% Formalin	Baseline	1.9814	1047.6
164	50uM Naloxone + 3uM Fentanyl + 0.05% Formalin	Baseline	1.40111	1040.63
165	50uM Naloxone + 3uM Fentanyl + 0.05% Formalin	Baseline	0.589737	1892.46
166	50uM Naloxone + 3uM Fentanyl + 0.05% Formalin	Baseline	0.213782	1821.42
169	50uM Naloxone + 3uM Fentanyl + 0.05% Formalin	Baseline	0.698229	1535.25
145	50uM Naloxone + 3uM Fentanyl + 0.05% Formalin	Treatment	2.02459	1322.07	2.02459	1322.07
146	50uM Naloxone + 3uM Fentanyl + 0.05% Formalin	Treatment	2.15767	1151.88	2.15767	1151.88
147	50uM Naloxone + 3uM Fentanyl + 0.05% Formalin	Treatment	1.78111	1521.12	1.78111	1521.12
148	50uM Naloxone + 3uM Fentanyl + 0.05% Formalin	Treatment	1.78786	1337.6	1.78786	1337.6
149	50uM Naloxone + 3uM Fentanyl + 0.05% Formalin	Treatment	0.53964	1775.77	0.53964	1775.77
150	50uM Naloxone + 3uM Fentanyl + 0.05% Formalin	Treatment	2.41942	1104.9	2.41942	1104.9
151	50uM Naloxone + 3uM Fentanyl + 0.05% Formalin	Treatment	2.18153	950.422	2.18153	950.422
152	50uM Naloxone + 3uM Fentanyl + 0.05% Formalin	Treatment	3.39573	1073.79	3.39573	1073.79
153	50uM Naloxone + 3uM Fentanyl + 0.05% Formalin	Treatment	1.31686	1560.61	1.31686	1560.61
154	50uM Naloxone + 3uM Fentanyl + 0.05% Formalin	Treatment	0.133322	2209.48	0.133322	2209.48
155	50uM Naloxone + 3uM Fentanyl + 0.05% Formalin	Treatment	1.60467	1088.43	1.60467	1088.43
156	50uM Naloxone + 3uM Fentanyl + 0.05% Formalin	Treatment	2.40488	1332.61	2.40488	1332.61
157	50uM Naloxone + 3uM Fentanyl + 0.05% Formalin	Treatment	1.5669	1618.68	1.5669	1618.68
158	50uM Naloxone + 3uM Fentanyl + 0.05% Formalin	Treatment	3.27394	1373.2	3.27394	1373.2
159	50uM Naloxone + 3uM Fentanyl + 0.05% Formalin	Treatment	2.58022	1355.2	2.58022	1355.2
160	50uM Naloxone + 3uM Fentanyl + 0.05% Formalin	Treatment	0.624107	1478.97	0.624107	1478.97
161	50uM Naloxone + 3uM Fentanyl + 0.05% Formalin	Treatment	3.51832	1264.82	3.51832	1264.82
162	50uM Naloxone + 3uM Fentanyl + 0.05% Formalin	Treatment	4.9796	856.674	4.9796	856.674
163	50uM Naloxone + 3uM Fentanyl + 0.05% Formalin	Treatment	3.8185	966.636	3.8185	966.636
164	50uM Naloxone + 3uM Fentanyl + 0.05% Formalin	Treatment	2.99221	1439.15	2.99221	1439.15
165	50uM Naloxone + 3uM Fentanyl + 0.05% Formalin	Treatment	4.28368	1033.79	4.28368	1033.79
166	50uM Naloxone + 3uM Fentanyl + 0.05% Formalin	Treatment	0.629223	1690.89	0.629223	1690.89
169	50uM Naloxone + 3uM Fentanyl + 0.05% Formalin	Treatment	3.15599	1325.99	3.15599	1325.99
74	4uM CTAP + 3uM Fentanyl + 0.05% Formalin	Baseline	0.946872	1201.35
75	4uM CTAP + 3uM Fentanyl + 0.05% Formalin	Baseline	0.3924	1516.19
76	4uM CTAP + 3uM Fentanyl + 0.05% Formalin	Baseline	0.191403	1548.28
78	4uM CTAP + 3uM Fentanyl + 0.05% Formalin	Baseline	0.610304	1559.28
79	4uM CTAP + 3uM Fentanyl + 0.05% Formalin	Baseline	0.667142	1537.51
80	4uM CTAP + 3uM Fentanyl + 0.05% Formalin	Baseline	0.171614	1933.11
81	4uM CTAP + 3uM Fentanyl + 0.05% Formalin	Baseline	0.671621	1715.63
82	4uM CTAP + 3uM Fentanyl + 0.05% Formalin	Baseline	0.386617	1820.77
83	4uM CTAP + 3uM Fentanyl + 0.05% Formalin	Baseline	0.651392	1738.79
84	4uM CTAP + 3uM Fentanyl + 0.05% Formalin	Baseline	0.999905	1516.96
85	4uM CTAP + 3uM Fentanyl + 0.05% Formalin	Baseline	0.863906	1407.26
86	4uM CTAP + 3uM Fentanyl + 0.05% Formalin	Baseline	0.56731	1547.97
87	4uM CTAP + 3uM Fentanyl + 0.05% Formalin	Baseline	0.847435	1465.67
88	4uM CTAP + 3uM Fentanyl + 0.05% Formalin	Baseline	0.187971	1847.06
89	4uM CTAP + 3uM Fentanyl + 0.05% Formalin	Baseline	0.771785	1445.76
74	4uM CTAP + 3uM Fentanyl + 0.05% Formalin	Treatment	0.547793	1278.26	0.547793	1278.26
75	4uM CTAP + 3uM Fentanyl + 0.05% Formalin	Treatment	2.32841	1150.71	2.32841	1150.71
76	4uM CTAP + 3uM Fentanyl + 0.05% Formalin	Treatment	1.74994	1125.58	1.74994	1125.58
78	4uM CTAP + 3uM Fentanyl + 0.05% Formalin	Treatment	1.74258	1572.38	1.74258	1572.38
79	4uM CTAP + 3uM Fentanyl + 0.05% Formalin	Treatment	3.88531	760.615		760.615
80	4uM CTAP + 3uM Fentanyl + 0.05% Formalin	Treatment	1.57757	1312.96	1.57757	1312.96
81	4uM CTAP + 3uM Fentanyl + 0.05% Formalin	Treatment	4.04676	858.849		858.849
82	4uM CTAP + 3uM Fentanyl + 0.05% Formalin	Treatment	0.200058	2170.72	0.200058	2170.72
83	4uM CTAP + 3uM Fentanyl + 0.05% Formalin	Treatment	1.35098	1406.48	1.35098	1406.48
84	4uM CTAP + 3uM Fentanyl + 0.05% Formalin	Treatment	1.12163	1190.33	1.12163	1190.33
85	4uM CTAP + 3uM Fentanyl + 0.05% Formalin	Treatment	0.563476	1857.29	0.563476	1857.29
86	4uM CTAP + 3uM Fentanyl + 0.05% Formalin	Treatment	0.781008	1417.25	0.781008	1417.25
87	4uM CTAP + 3uM Fentanyl + 0.05% Formalin	Treatment	1.5262	1665.44	1.5262	1665.44
88	4uM CTAP + 3uM Fentanyl + 0.05% Formalin	Treatment	0.716914	1733.35	0.716914	1733.35
89	4uM CTAP + 3uM Fentanyl + 0.05% Formalin	Treatment	0.112545	2327.28	0.112545	2327.28
106	50uM CTAP + 3uM Fentanyl + 0.05% Formalin	Baseline	0.967531	1359.19
107	50uM CTAP + 3uM Fentanyl + 0.05% Formalin	Baseline	0.684712	1493.2
108	50uM CTAP + 3uM Fentanyl + 0.05% Formalin	Baseline	0.440992	1845.64
109	50uM CTAP + 3uM Fentanyl + 0.05% Formalin	Baseline	1.08852	1085.47
110	50uM CTAP + 3uM Fentanyl + 0.05% Formalin	Baseline	1.51899	1154.56
111	50uM CTAP + 3uM Fentanyl + 0.05% Formalin	Baseline	1.9879	1137.26
112	50uM CTAP + 3uM Fentanyl + 0.05% Formalin	Baseline	0.649672	1482.62
113	50uM CTAP + 3uM Fentanyl + 0.05% Formalin	Baseline	0.610908	1402.33
114	50uM CTAP + 3uM Fentanyl + 0.05% Formalin	Baseline	0.774486	1219.72
115	50uM CTAP + 3uM Fentanyl + 0.05% Formalin	Baseline	0.335697	1792.87
116	50uM CTAP + 3uM Fentanyl + 0.05% Formalin	Baseline	0.63185	1546.95
117	50uM CTAP + 3uM Fentanyl + 0.05% Formalin	Baseline	0.172977	1868.55
118	50uM CTAP + 3uM Fentanyl + 0.05% Formalin	Baseline	0.725801	1449.47
106	50uM CTAP + 3uM Fentanyl + 0.05% Formalin	Treatment	1.38096	1420.09	1.38096	1420.09
107	50uM CTAP + 3uM Fentanyl + 0.05% Formalin	Treatment	2.54093	916.593	2.54093	916.593
108	50uM CTAP + 3uM Fentanyl + 0.05% Formalin	Treatment	2.12024	1246.75	2.12024	1246.75
109	50uM CTAP + 3uM Fentanyl + 0.05% Formalin	Treatment	0.239376	1849.77	0.239376	1849.77
110	50uM CTAP + 3uM Fentanyl + 0.05% Formalin	Treatment	0.559653	1764.45	0.559653	1764.45
111	50uM CTAP + 3uM Fentanyl + 0.05% Formalin	Treatment	1.10763	1349.29	1.10763	1349.29
112	50uM CTAP + 3uM Fentanyl + 0.05% Formalin	Treatment	1.5777	1333.93	1.5777	1333.93
113	50uM CTAP + 3uM Fentanyl + 0.05% Formalin	Treatment	2.05743	1078.25	2.05743	1078.25
114	50uM CTAP + 3uM Fentanyl + 0.05% Formalin	Treatment	0.607662	1698.1	0.607662	1698.1
115	50uM CTAP + 3uM Fentanyl + 0.05% Formalin	Treatment	0.200418	2113.31	0.200418	2113.31
116	50uM CTAP + 3uM Fentanyl + 0.05% Formalin	Treatment	1.87963	1054.91	1.87963	1054.91
117	50uM CTAP + 3uM Fentanyl + 0.05% Formalin	Treatment	0.496588	1751.17	0.496588	1751.17
118	50uM CTAP + 3uM Fentanyl + 0.05% Formalin	Treatment	0.124998	2198.17	0.124998	2198.17

## Sheet: Figure5E
Animal #	Group	Condition	Swimming velocity	Angular velocity
2	Control (embryo water)	Baseline	0.957819	1399.17
3	Control (embryo water)	Baseline	1.0802	1560.14
4	Control (embryo water)	Baseline	0.642307	1565.87
5	Control (embryo water)	Baseline	0.207587	2052.66
6	Control (embryo water)	Baseline	0.73738	1488.83
7	Control (embryo water)	Baseline	0.237489	1661.2
8	Control (embryo water)	Baseline	0.143537	2245.61
9	Control (embryo water)	Baseline	1.19232	1277.15
10	Control (embryo water)	Baseline	0.594376	1847.87
2	Control (embryo water)	Treatment	0.112568	1809.68
3	Control (embryo water)	Treatment	0.277008	1761.11
4	Control (embryo water)	Treatment	0.593317	1248.42
5	Control (embryo water)	Treatment	0.35653	1692.87
6	Control (embryo water)	Treatment	0.221666	2113.88
7	Control (embryo water)	Treatment	0.137914	2132.59
8	Control (embryo water)	Treatment	2.14389	968.303
9	Control (embryo water)	Treatment	0.651709	1733.23
10	Control (embryo water)	Treatment	0.393041	1679.03
29	5uM Naloxone	Baseline	0.337671	1267.42
30	5uM Naloxone	Baseline	0.46039	1446.02
31	5uM Naloxone	Baseline	1.64941	819.831
32	5uM Naloxone	Baseline	0.765047	1416.93
33	5uM Naloxone	Baseline	0.285752	1076.07
34	5uM Naloxone	Baseline	1.25388	1172.78
35	5uM Naloxone	Baseline	0.741181	1174.19
29	5uM Naloxone	Treatment	0.412991	1034.58
30	5uM Naloxone	Treatment	0.415103	1144.05
31	5uM Naloxone	Treatment	0.683847	1000.7
32	5uM Naloxone	Treatment	1.16187	1359.42
33	5uM Naloxone	Treatment	0.194725	1649.04
34	5uM Naloxone	Treatment	0.344701	1441.22
35	5uM Naloxone	Treatment	0.398148	1471.24
36	20uM Naloxone	Baseline	1.94175	1114.89
37	20uM Naloxone	Baseline	0.44431	1804.98
38	20uM Naloxone	Baseline	0.756736	1392.06
39	20uM Naloxone	Baseline	0.402307	1737.1
40	20uM Naloxone	Baseline	0.198778	2082.42
41	20uM Naloxone	Baseline	0.201874	1866.5
42	20uM Naloxone	Baseline	0.76576	1378.73
43	20uM Naloxone	Baseline	1.48574	1175.44
36	20uM Naloxone	Treatment	1.37725	1434.19
37	20uM Naloxone	Treatment	0.521707	1242.55
38	20uM Naloxone	Treatment	0.412464	1691.58
39	20uM Naloxone	Treatment	1.08677	1473.67
40	20uM Naloxone	Treatment	0.168896	1721.28
41	20uM Naloxone	Treatment	0.495138	1390.71
42	20uM Naloxone	Treatment	0.759455	1449.99
43	20uM Naloxone	Treatment	0.281415	1664.03
44	50uM Naloxone	Baseline	0.507383	1877.51
45	50uM Naloxone	Baseline	0.624332	1618.71
46	50uM Naloxone	Baseline	0.424048	1743.91
48	50uM Naloxone	Baseline	0.822912	1627.6
49	50uM Naloxone	Baseline	0.866187	1487
50	50uM Naloxone	Baseline	1.59309	1060.96
51	50uM Naloxone	Baseline	0.413051	1646.93
44	50uM Naloxone	Treatment	2.04278	1159.03
45	50uM Naloxone	Treatment	2.06926	1086.8
46	50uM Naloxone	Treatment	1.38924	1152.23
48	50uM Naloxone	Treatment	1.9647	1192.38
49	50uM Naloxone	Treatment	1.56889	1263.12
50	50uM Naloxone	Treatment	1.68788	1322.69
51	50uM Naloxone	Treatment	2.20062	1282.21
11	4uM CTAP	Baseline	0.705848	1328.24
12	4uM CTAP	Baseline	1.21515	1292.44
13	4uM CTAP	Baseline	0.444991	1523.55
14	4uM CTAP	Baseline	0.844488	1292.55
15	4uM CTAP	Baseline	0.392033	1382.06
16	4uM CTAP	Baseline	0.254418	1946.58
17	4uM CTAP	Baseline	0.515642	1189.84
18	4uM CTAP	Baseline	0.237077	1837.13
19	4uM CTAP	Baseline	1.06794	1534.49
11	4uM CTAP	Treatment	0.141102	1914.11
12	4uM CTAP	Treatment	1.36457	1165.17
13	4uM CTAP	Treatment	1.80155	1216.31
14	4uM CTAP	Treatment	1.3061	1220.06
15	4uM CTAP	Treatment	0.380807	1512.58
16	4uM CTAP	Treatment	0.112963	1762.93
17	4uM CTAP	Treatment	2.00253	1024.29
18	4uM CTAP	Treatment	0.178484	2014.62
19	4uM CTAP	Treatment	0.137356	2066.17
20	50uM CTAP	Baseline	1.48631	1266.6
21	50uM CTAP	Baseline	1.91628	1348.12
22	50uM CTAP	Baseline	0.297887	2079.91
23	50uM CTAP	Baseline	0.934348	1488.39
24	50uM CTAP	Baseline	0.549307	1809.87
25	50uM CTAP	Baseline	0.708339	1500.86
26	50uM CTAP	Baseline	0.222684	1750.21
27	50uM CTAP	Baseline	0.247722	1462.47
20	50uM CTAP	Treatment	0.135241	1674.49
21	50uM CTAP	Treatment	1.44274	1388.24
22	50uM CTAP	Treatment	0.0967385	1979.35
23	50uM CTAP	Treatment	0.182059	1980.06
24	50uM CTAP	Treatment	1.95666	1254.12
25	50uM CTAP	Treatment	0.970852	1321.21
26	50uM CTAP	Treatment	1.10187	1134.85
27	50uM CTAP	Treatment	1.59371	1362.01
