# Supplementary material for: Respiratory depression and analgesia by opioid drugs in freely behaving larval zebrafish
Source: eLife. 2021 Mar 15;10:e63407. doi: 10.7554/eLife.63407 (PMC8060028; doi:10.7554/eLife.63407)
Supplement: Figure 6—source data 1. [file elife-63407-fig6-data1.xlsx]

## Sheet: Figure6b
Animal	Group	Grp	Time	Velocity
1	Control (embryo water)	Ctrl	0	2.02635
1	Control (embryo water)	Ctrl	1	2.92288
1	Control (embryo water)	Ctrl	2	2.10885
1	Control (embryo water)	Ctrl	3	0.378638
1	Control (embryo water)	Ctrl	4	0.167135
1	Control (embryo water)	Ctrl	5	0.0923077
1	Control (embryo water)	Ctrl	6	0.0620673
1	Control (embryo water)	Ctrl	7	0.0645905
1	Control (embryo water)	Ctrl	8	0.0672897
1	Control (embryo water)	Ctrl	9	0.150828
1	Control (embryo water)	Ctrl	10	0.0838535
1	Control (embryo water)	Ctrl	11	0.0813878
1	Control (embryo water)	Ctrl	12	0.0747412
1	Control (embryo water)	Ctrl	13	0.0770645
1	Control (embryo water)	Ctrl	14	0.0697562
1	Control (embryo water)	Ctrl	15	0.094451
1	Control (embryo water)	Ctrl	16	0.0958925
1	Control (embryo water)	Ctrl	17	0.105642
1	Control (embryo water)	Ctrl	18	0.0807842
1	Control (embryo water)	Ctrl	19	0.0525228
1	Control (embryo water)	Ctrl	20	0.129377
2	Control (embryo water)	Ctrl	0	0.708209
2	Control (embryo water)	Ctrl	1	0.162473
2	Control (embryo water)	Ctrl	2	0.26178
2	Control (embryo water)	Ctrl	3	1.83478
2	Control (embryo water)	Ctrl	4	2.25805
2	Control (embryo water)	Ctrl	5	2.77107
2	Control (embryo water)	Ctrl	6	1.78488
2	Control (embryo water)	Ctrl	7	0.250505
2	Control (embryo water)	Ctrl	8	0.21111
2	Control (embryo water)	Ctrl	9	0.157653
2	Control (embryo water)	Ctrl	10	0.0311757
2	Control (embryo water)	Ctrl	11	0.335008
2	Control (embryo water)	Ctrl	12	0.462387
2	Control (embryo water)	Ctrl	13	0.350405
2	Control (embryo water)	Ctrl	14	0.440385
2	Control (embryo water)	Ctrl	15	0.104423
2	Control (embryo water)	Ctrl	16	0.0541812
2	Control (embryo water)	Ctrl	17	0.085126
2	Control (embryo water)	Ctrl	18	0.159247
2	Control (embryo water)	Ctrl	19	0.166957
2	Control (embryo water)	Ctrl	20	0.34846
3	Control (embryo water)	Ctrl	0	0.826395
3	Control (embryo water)	Ctrl	1	0.154974
3	Control (embryo water)	Ctrl	2	0.226823
3	Control (embryo water)	Ctrl	3	0.52414
3	Control (embryo water)	Ctrl	4	0.17101
3	Control (embryo water)	Ctrl	5	0.135716
3	Control (embryo water)	Ctrl	6	0.0762243
3	Control (embryo water)	Ctrl	7	0.0392732
3	Control (embryo water)	Ctrl	8	0.158359
3	Control (embryo water)	Ctrl	9	0.136905
3	Control (embryo water)	Ctrl	10	0.137147
3	Control (embryo water)	Ctrl	11	0.253988
3	Control (embryo water)	Ctrl	12	0.0722117
3	Control (embryo water)	Ctrl	13	0.119678
3	Control (embryo water)	Ctrl	14	0.141039
3	Control (embryo water)	Ctrl	15	0.0754707
3	Control (embryo water)	Ctrl	16	0.342245
3	Control (embryo water)	Ctrl	17	0.277193
3	Control (embryo water)	Ctrl	18	0.16099
3	Control (embryo water)	Ctrl	19	0.341335
3	Control (embryo water)	Ctrl	20	0.0874093
4	Control (embryo water)	Ctrl	0	1.12127
4	Control (embryo water)	Ctrl	1	0.100813
4	Control (embryo water)	Ctrl	2	0.069726
4	Control (embryo water)	Ctrl	3	0.264517
4	Control (embryo water)	Ctrl	4	0.124366
4	Control (embryo water)	Ctrl	5	0.0962933
4	Control (embryo water)	Ctrl	6	0.0777717
4	Control (embryo water)	Ctrl	7	0.399357
4	Control (embryo water)	Ctrl	8	0.505168
4	Control (embryo water)	Ctrl	9	0.307492
4	Control (embryo water)	Ctrl	10	0.0983455
4	Control (embryo water)	Ctrl	11	0.0727713
4	Control (embryo water)	Ctrl	12	0.109796
4	Control (embryo water)	Ctrl	13	0.0846213
4	Control (embryo water)	Ctrl	14	0.296518
4	Control (embryo water)	Ctrl	15	0.182522
4	Control (embryo water)	Ctrl	16	0.049406
4	Control (embryo water)	Ctrl	17	0.130339
4	Control (embryo water)	Ctrl	18	0.0624488
4	Control (embryo water)	Ctrl	19	0.0606512
4	Control (embryo water)	Ctrl	20	0.0999938
5	Control (embryo water)	Ctrl	0	1.68648
5	Control (embryo water)	Ctrl	1	2.73212
5	Control (embryo water)	Ctrl	2	2.35073
5	Control (embryo water)	Ctrl	3	1.65574
5	Control (embryo water)	Ctrl	4	0.485092
5	Control (embryo water)	Ctrl	5	0.0790718
5	Control (embryo water)	Ctrl	6	0.100127
5	Control (embryo water)	Ctrl	7	0.0820278
5	Control (embryo water)	Ctrl	8	0.0494103
5	Control (embryo water)	Ctrl	9	0.0614392
5	Control (embryo water)	Ctrl	10	0.36268
5	Control (embryo water)	Ctrl	11	0.298595
5	Control (embryo water)	Ctrl	12	0.0942802
5	Control (embryo water)	Ctrl	13	0.0593797
5	Control (embryo water)	Ctrl	14	0.075049
5	Control (embryo water)	Ctrl	15	0.0664968
5	Control (embryo water)	Ctrl	16	0.0925227
5	Control (embryo water)	Ctrl	17	0.0759573
5	Control (embryo water)	Ctrl	18	0.48948
5	Control (embryo water)	Ctrl	19	0.0784993
5	Control (embryo water)	Ctrl	20	0.077919
6	Control (embryo water)	Ctrl	0	0.215523
6	Control (embryo water)	Ctrl	1	0.0456143
6	Control (embryo water)	Ctrl	2	0.118603
6	Control (embryo water)	Ctrl	3	0.05393
6	Control (embryo water)	Ctrl	4	0.0513622
6	Control (embryo water)	Ctrl	5	0.112575
6	Control (embryo water)	Ctrl	6	0.090179
6	Control (embryo water)	Ctrl	7	0.0899777
6	Control (embryo water)	Ctrl	8	0.0824258
6	Control (embryo water)	Ctrl	9	0.0842992
6	Control (embryo water)	Ctrl	10	0.0883635
6	Control (embryo water)	Ctrl	11	0.217772
6	Control (embryo water)	Ctrl	12	0.65097
6	Control (embryo water)	Ctrl	13	0.0379795
6	Control (embryo water)	Ctrl	14	0.0693207
6	Control (embryo water)	Ctrl	15	0.093512
6	Control (embryo water)	Ctrl	16	0.082324
6	Control (embryo water)	Ctrl	17	0.0689035
6	Control (embryo water)	Ctrl	18	0.365205
6	Control (embryo water)	Ctrl	19	0.183997
6	Control (embryo water)	Ctrl	20	0.170032
7	Control (embryo water)	Ctrl	0	0.140006
7	Control (embryo water)	Ctrl	1	0.140903
7	Control (embryo water)	Ctrl	2	0.381182
7	Control (embryo water)	Ctrl	3	0.10061
7	Control (embryo water)	Ctrl	4	0.141704
7	Control (embryo water)	Ctrl	5	0.87212
7	Control (embryo water)	Ctrl	6	1.84987
7	Control (embryo water)	Ctrl	7	1.59229
7	Control (embryo water)	Ctrl	8	0.381633
7	Control (embryo water)	Ctrl	9	0.109404
7	Control (embryo water)	Ctrl	10	0.0704585
7	Control (embryo water)	Ctrl	11	0.0696315
7	Control (embryo water)	Ctrl	12	0.0654108
7	Control (embryo water)	Ctrl	13	0.0566528
7	Control (embryo water)	Ctrl	14	0.0512433
7	Control (embryo water)	Ctrl	15	0.086086
7	Control (embryo water)	Ctrl	16	0.10423
7	Control (embryo water)	Ctrl	17	0.0997662
7	Control (embryo water)	Ctrl	18	1.10111
7	Control (embryo water)	Ctrl	19	1.54312
7	Control (embryo water)	Ctrl	20	0.886462
8	Control (embryo water)	Ctrl	0	1.64741
8	Control (embryo water)	Ctrl	1	0.227315
8	Control (embryo water)	Ctrl	2	0.272722
8	Control (embryo water)	Ctrl	3	0.309662
8	Control (embryo water)	Ctrl	4	0.272102
8	Control (embryo water)	Ctrl	5	0.0493428
8	Control (embryo water)	Ctrl	6	0.0479042
8	Control (embryo water)	Ctrl	7	0.069499
8	Control (embryo water)	Ctrl	8	0.0575397
8	Control (embryo water)	Ctrl	9	0.0609627
8	Control (embryo water)	Ctrl	10	0.259712
8	Control (embryo water)	Ctrl	11	0.173842
8	Control (embryo water)	Ctrl	12	0.1834
8	Control (embryo water)	Ctrl	13	0.0481308
8	Control (embryo water)	Ctrl	14	0.04763
8	Control (embryo water)	Ctrl	15	0.0489403
8	Control (embryo water)	Ctrl	16	0.122924
8	Control (embryo water)	Ctrl	17	0.115476
8	Control (embryo water)	Ctrl	18	0.224583
8	Control (embryo water)	Ctrl	19	0.0787175
8	Control (embryo water)	Ctrl	20	0.0638362
9	Control (embryo water)	Ctrl	0	0.211925
9	Control (embryo water)	Ctrl	1	0.0498578
9	Control (embryo water)	Ctrl	2	0.135996
9	Control (embryo water)	Ctrl	3	0.295583
9	Control (embryo water)	Ctrl	4	0.464613
9	Control (embryo water)	Ctrl	5	0.26249
9	Control (embryo water)	Ctrl	6	0.104608
9	Control (embryo water)	Ctrl	7	0.112968
9	Control (embryo water)	Ctrl	8	0.127687
9	Control (embryo water)	Ctrl	9	0.155081
9	Control (embryo water)	Ctrl	10	0.329887
9	Control (embryo water)	Ctrl	11	0.472697
9	Control (embryo water)	Ctrl	12	1.07203
9	Control (embryo water)	Ctrl	13	0.044738
9	Control (embryo water)	Ctrl	14	1.2078
9	Control (embryo water)	Ctrl	15	0.67627
9	Control (embryo water)	Ctrl	16	0.0608827
9	Control (embryo water)	Ctrl	17	0.0579962
9	Control (embryo water)	Ctrl	18	0.0561235
9	Control (embryo water)	Ctrl	19	0.242895
9	Control (embryo water)	Ctrl	20	0.176993
10	Control (embryo water)	Ctrl	0	0.278348
10	Control (embryo water)	Ctrl	1	0.475827
10	Control (embryo water)	Ctrl	2	0.088967
10	Control (embryo water)	Ctrl	3	0.241278
10	Control (embryo water)	Ctrl	4	0.083184
10	Control (embryo water)	Ctrl	5	0.0635458
10	Control (embryo water)	Ctrl	6	0.0798793
10	Control (embryo water)	Ctrl	7	0.0939893
10	Control (embryo water)	Ctrl	8	0.118174
10	Control (embryo water)	Ctrl	9	0.0509383
10	Control (embryo water)	Ctrl	10	0.178115
10	Control (embryo water)	Ctrl	11	0.587572
10	Control (embryo water)	Ctrl	12	0.508378
10	Control (embryo water)	Ctrl	13	0.168102
10	Control (embryo water)	Ctrl	14	0.0802963
10	Control (embryo water)	Ctrl	15	0.0732758
10	Control (embryo water)	Ctrl	16	0.076653
10	Control (embryo water)	Ctrl	17	0.117149
10	Control (embryo water)	Ctrl	18	0.054446
10	Control (embryo water)	Ctrl	19	0.0586633
10	Control (embryo water)	Ctrl	20	0.109982
11	Control (embryo water)	Ctrl	0	1.02338
11	Control (embryo water)	Ctrl	1	0.688845
11	Control (embryo water)	Ctrl	2	0.704307
11	Control (embryo water)	Ctrl	3	0.724702
11	Control (embryo water)	Ctrl	4	0.238258
11	Control (embryo water)	Ctrl	5	2.11828
11	Control (embryo water)	Ctrl	6	1.53656
11	Control (embryo water)	Ctrl	7	1.16866
11	Control (embryo water)	Ctrl	8	1.02786
11	Control (embryo water)	Ctrl	9	0.826703
11	Control (embryo water)	Ctrl	10	1.34203
11	Control (embryo water)	Ctrl	11	1.42328
11	Control (embryo water)	Ctrl	12	0.853688
11	Control (embryo water)	Ctrl	13	0.37264
11	Control (embryo water)	Ctrl	14	0.224235
11	Control (embryo water)	Ctrl	15	0.066443
11	Control (embryo water)	Ctrl	16	0.0554117
11	Control (embryo water)	Ctrl	17	0.06969
11	Control (embryo water)	Ctrl	18	1.28739
11	Control (embryo water)	Ctrl	19	1.20323
11	Control (embryo water)	Ctrl	20	1.05461
12	Control (embryo water)	Ctrl	0	1.43722
12	Control (embryo water)	Ctrl	1	0.987023
12	Control (embryo water)	Ctrl	2	0.518473
12	Control (embryo water)	Ctrl	3	0.55185
12	Control (embryo water)	Ctrl	4	0.574658
12	Control (embryo water)	Ctrl	5	0.306885
12	Control (embryo water)	Ctrl	6	0.346695
12	Control (embryo water)	Ctrl	7	0.4237
12	Control (embryo water)	Ctrl	8	0.367447
12	Control (embryo water)	Ctrl	9	0.45747
12	Control (embryo water)	Ctrl	10	0.805662
12	Control (embryo water)	Ctrl	11	0.739882
12	Control (embryo water)	Ctrl	12	0.777383
12	Control (embryo water)	Ctrl	13	0.636725
12	Control (embryo water)	Ctrl	14	0.313703
12	Control (embryo water)	Ctrl	15	0.0708088
12	Control (embryo water)	Ctrl	16	0.0719268
12	Control (embryo water)	Ctrl	17	0.0865472
12	Control (embryo water)	Ctrl	18	0.0653022
12	Control (embryo water)	Ctrl	19	0.0784132
12	Control (embryo water)	Ctrl	20	0.0705083
13	Control (embryo water)	Ctrl	0	0.634015
13	Control (embryo water)	Ctrl	1	1.83043
13	Control (embryo water)	Ctrl	2	2.05807
13	Control (embryo water)	Ctrl	3	0.948263
13	Control (embryo water)	Ctrl	4	0.824805
13	Control (embryo water)	Ctrl	5	0.43703
13	Control (embryo water)	Ctrl	6	0.366345
13	Control (embryo water)	Ctrl	7	0.42638
13	Control (embryo water)	Ctrl	8	0.585138
13	Control (embryo water)	Ctrl	9	0.236373
13	Control (embryo water)	Ctrl	10	0.314398
13	Control (embryo water)	Ctrl	11	0.673457
13	Control (embryo water)	Ctrl	12	0.630955
13	Control (embryo water)	Ctrl	13	0.899973
13	Control (embryo water)	Ctrl	14	1.32062
13	Control (embryo water)	Ctrl	15	0.990232
13	Control (embryo water)	Ctrl	16	0.819417
13	Control (embryo water)	Ctrl	17	0.529725
13	Control (embryo water)	Ctrl	18	1.0498
13	Control (embryo water)	Ctrl	19	1.22305
13	Control (embryo water)	Ctrl	20	1.51765
14	Control (embryo water)	Ctrl	0	1.05585
14	Control (embryo water)	Ctrl	1	0.0535753
14	Control (embryo water)	Ctrl	2	0.48935
14	Control (embryo water)	Ctrl	3	1.0772
14	Control (embryo water)	Ctrl	4	0.993998
14	Control (embryo water)	Ctrl	5	1.17674
14	Control (embryo water)	Ctrl	6	1.20525
14	Control (embryo water)	Ctrl	7	1.14481
14	Control (embryo water)	Ctrl	8	1.14236
14	Control (embryo water)	Ctrl	9	1.47197
14	Control (embryo water)	Ctrl	10	2.11945
14	Control (embryo water)	Ctrl	11	1.61082
14	Control (embryo water)	Ctrl	12	1.01471
14	Control (embryo water)	Ctrl	13	0.958857
14	Control (embryo water)	Ctrl	14	1.2141
14	Control (embryo water)	Ctrl	15	1.2813
14	Control (embryo water)	Ctrl	16	0.953152
14	Control (embryo water)	Ctrl	17	0.331632
14	Control (embryo water)	Ctrl	18	0.424133
14	Control (embryo water)	Ctrl	19	0.301767
14	Control (embryo water)	Ctrl	20	0.706483
15	Control (embryo water)	Ctrl	0	1.46308
15	Control (embryo water)	Ctrl	1	0.43012
15	Control (embryo water)	Ctrl	2	0.377827
15	Control (embryo water)	Ctrl	3	0.429305
15	Control (embryo water)	Ctrl	4	0.856833
15	Control (embryo water)	Ctrl	5	0.675095
15	Control (embryo water)	Ctrl	6	1.20661
15	Control (embryo water)	Ctrl	7	0.937188
15	Control (embryo water)	Ctrl	8	0.637907
15	Control (embryo water)	Ctrl	9	0.696593
15	Control (embryo water)	Ctrl	10	0.360252
15	Control (embryo water)	Ctrl	11	0.432152
15	Control (embryo water)	Ctrl	12	0.797528
15	Control (embryo water)	Ctrl	13	0.88649
15	Control (embryo water)	Ctrl	14	0.62806
15	Control (embryo water)	Ctrl	15	0.269372
15	Control (embryo water)	Ctrl	16	0.91781
15	Control (embryo water)	Ctrl	17	0.907075
15	Control (embryo water)	Ctrl	18	0.75827
15	Control (embryo water)	Ctrl	19	0.533835
15	Control (embryo water)	Ctrl	20	0.63464
16	Control (embryo water)	Ctrl	0	2.17382
16	Control (embryo water)	Ctrl	1	1.20784
16	Control (embryo water)	Ctrl	2	2.14372
16	Control (embryo water)	Ctrl	3	2.87183
16	Control (embryo water)	Ctrl	4	2.80892
16	Control (embryo water)	Ctrl	5	2.02988
16	Control (embryo water)	Ctrl	6	1.9751
16	Control (embryo water)	Ctrl	7	1.55343
16	Control (embryo water)	Ctrl	8	1.74277
16	Control (embryo water)	Ctrl	9	1.8635
16	Control (embryo water)	Ctrl	10	1.87437
16	Control (embryo water)	Ctrl	11	1.87622
16	Control (embryo water)	Ctrl	12	2.0468
16	Control (embryo water)	Ctrl	13	1.86913
16	Control (embryo water)	Ctrl	14	1.98907
16	Control (embryo water)	Ctrl	15	2.43775
16	Control (embryo water)	Ctrl	16	1.77263
16	Control (embryo water)	Ctrl	17	1.95068
16	Control (embryo water)	Ctrl	18	2.13055
16	Control (embryo water)	Ctrl	19	1.8028
16	Control (embryo water)	Ctrl	20	1.99265
17	Control (embryo water)	Ctrl	0	1.50321
17	Control (embryo water)	Ctrl	1	0.088657
17	Control (embryo water)	Ctrl	2	0.06457
17	Control (embryo water)	Ctrl	3	0.0718022
17	Control (embryo water)	Ctrl	4	0.0838755
17	Control (embryo water)	Ctrl	5	0.0890163
17	Control (embryo water)	Ctrl	6	0.0760925
17	Control (embryo water)	Ctrl	7	0.331493
17	Control (embryo water)	Ctrl	8	1.20573
17	Control (embryo water)	Ctrl	9	1.11083
17	Control (embryo water)	Ctrl	10	1.00616
17	Control (embryo water)	Ctrl	11	2.15908
17	Control (embryo water)	Ctrl	12	2.13418
17	Control (embryo water)	Ctrl	13	3.43998
17	Control (embryo water)	Ctrl	14	2.03427
17	Control (embryo water)	Ctrl	15	1.83297
17	Control (embryo water)	Ctrl	16	1.95218
17	Control (embryo water)	Ctrl	17	0.50869
17	Control (embryo water)	Ctrl	18	0.953175
17	Control (embryo water)	Ctrl	19	1.56423
17	Control (embryo water)	Ctrl	20	1.78062
18	Control (embryo water)	Ctrl	0	0.728206
18	Control (embryo water)	Ctrl	1	0.044166
18	Control (embryo water)	Ctrl	2	0.0430152
18	Control (embryo water)	Ctrl	3	0.172468
18	Control (embryo water)	Ctrl	4	0.121427
18	Control (embryo water)	Ctrl	5	0.146388
18	Control (embryo water)	Ctrl	6	0.280553
18	Control (embryo water)	Ctrl	7	0.238573
18	Control (embryo water)	Ctrl	8	0.314575
18	Control (embryo water)	Ctrl	9	0.586207
18	Control (embryo water)	Ctrl	10	0.503635
18	Control (embryo water)	Ctrl	11	0.241805
18	Control (embryo water)	Ctrl	12	0.337508
18	Control (embryo water)	Ctrl	13	0.654103
18	Control (embryo water)	Ctrl	14	0.459362
18	Control (embryo water)	Ctrl	15	1.70435
18	Control (embryo water)	Ctrl	16	3.26148
18	Control (embryo water)	Ctrl	17	1.53424
18	Control (embryo water)	Ctrl	18	1.95727
18	Control (embryo water)	Ctrl	19	2.46448
18	Control (embryo water)	Ctrl	20	0.996322
19	Control (embryo water)	Ctrl	0	1.33166
19	Control (embryo water)	Ctrl	1	0.239573
19	Control (embryo water)	Ctrl	2	0.324493
19	Control (embryo water)	Ctrl	3	0.439707
19	Control (embryo water)	Ctrl	4	0.335155
19	Control (embryo water)	Ctrl	5	0.165146
19	Control (embryo water)	Ctrl	6	0.28468
19	Control (embryo water)	Ctrl	7	0.378052
19	Control (embryo water)	Ctrl	8	0.234512
19	Control (embryo water)	Ctrl	9	0.3941
19	Control (embryo water)	Ctrl	10	0.413225
19	Control (embryo water)	Ctrl	11	0.431175
19	Control (embryo water)	Ctrl	12	0.351848
19	Control (embryo water)	Ctrl	13	0.845892
19	Control (embryo water)	Ctrl	14	0.400623
19	Control (embryo water)	Ctrl	15	0.307637
19	Control (embryo water)	Ctrl	16	0.19979
19	Control (embryo water)	Ctrl	17	0.331757
19	Control (embryo water)	Ctrl	18	0.158749
19	Control (embryo water)	Ctrl	19	0.230832
19	Control (embryo water)	Ctrl	20	0.377072
20	100uM AITC	AITC	0	0.1709
20	100uM AITC	AITC	1	2.2982
20	100uM AITC	AITC	2	1.61191
20	100uM AITC	AITC	3	1.99548
20	100uM AITC	AITC	4	0.44484
20	100uM AITC	AITC	5	0.103365
20	100uM AITC	AITC	6	0.218218
20	100uM AITC	AITC	7	0.20814
20	100uM AITC	AITC	8	0.227757
20	100uM AITC	AITC	9	0.224013
20	100uM AITC	AITC	10	0.116275
20	100uM AITC	AITC	11	0.118655
20	100uM AITC	AITC	12	0.189195
20	100uM AITC	AITC	13	0.03412
20	100uM AITC	AITC	14	0.0519313
20	100uM AITC	AITC	15	0.0791823
20	100uM AITC	AITC	16	0.129285
20	100uM AITC	AITC	17	0.442695
20	100uM AITC	AITC	18	0.159869
20	100uM AITC	AITC	19	0.495038
20	100uM AITC	AITC	20	0.422948
21	100uM AITC	AITC	0	0.620087
21	100uM AITC	AITC	1	3.5961
21	100uM AITC	AITC	2	2.57725
21	100uM AITC	AITC	3	1.14045
21	100uM AITC	AITC	4	1.45357
21	100uM AITC	AITC	5	1.75648
21	100uM AITC	AITC	6	1.31953
21	100uM AITC	AITC	7	1.15732
21	100uM AITC	AITC	8	1.38055
21	100uM AITC	AITC	9	1.24771
21	100uM AITC	AITC	10	1.18091
21	100uM AITC	AITC	11	0.69521
21	100uM AITC	AITC	12	1.02645
21	100uM AITC	AITC	13	1.15274
21	100uM AITC	AITC	14	1.19098
21	100uM AITC	AITC	15	1.44148
21	100uM AITC	AITC	16	1.14487
21	100uM AITC	AITC	17	1.43616
21	100uM AITC	AITC	18	1.10631
21	100uM AITC	AITC	19	0.411693
21	100uM AITC	AITC	20	0.588623
22	100uM AITC	AITC	0	0.758217
22	100uM AITC	AITC	1	3.58337
22	100uM AITC	AITC	2	2.29082
22	100uM AITC	AITC	3	0.148797
22	100uM AITC	AITC	4	0.0362332
22	100uM AITC	AITC	5	0.0367688
22	100uM AITC	AITC	6	0.0340585
22	100uM AITC	AITC	7	0.376295
22	100uM AITC	AITC	8	0.410608
22	100uM AITC	AITC	9	0.583232
22	100uM AITC	AITC	10	0.570875
22	100uM AITC	AITC	11	0.43775
22	100uM AITC	AITC	12	1.10839
22	100uM AITC	AITC	13	0.315723
22	100uM AITC	AITC	14	0.195793
22	100uM AITC	AITC	15	0.164868
22	100uM AITC	AITC	16	0.342613
22	100uM AITC	AITC	17	0.659108
22	100uM AITC	AITC	18	0.395725
22	100uM AITC	AITC	19	0.334805
22	100uM AITC	AITC	20	0.376162
23	100uM AITC	AITC	0	0.853705
23	100uM AITC	AITC	1	0.0981123
23	100uM AITC	AITC	2	0.123197
23	100uM AITC	AITC	3	0.383158
23	100uM AITC	AITC	4	0.130973
23	100uM AITC	AITC	5	0.460997
23	100uM AITC	AITC	6	0.312528
23	100uM AITC	AITC	7	0.47435
23	100uM AITC	AITC	8	0.140782
23	100uM AITC	AITC	9	0.190918
23	100uM AITC	AITC	10	0.355753
23	100uM AITC	AITC	11	0.132521
23	100uM AITC	AITC	12	0.510852
23	100uM AITC	AITC	13	0.339232
23	100uM AITC	AITC	14	0.35837
23	100uM AITC	AITC	15	0.444225
23	100uM AITC	AITC	16	0.391303
23	100uM AITC	AITC	17	0.192993
23	100uM AITC	AITC	18	0.187505
23	100uM AITC	AITC	19	0.0570988
23	100uM AITC	AITC	20	0.0367552
24	100uM AITC	AITC	0	1.01979
24	100uM AITC	AITC	1	1.17337
24	100uM AITC	AITC	2	1.07423
24	100uM AITC	AITC	3	0.927317
24	100uM AITC	AITC	4	1.2689
24	100uM AITC	AITC	5	1.37682
24	100uM AITC	AITC	6	1.12676
24	100uM AITC	AITC	7	0.792435
24	100uM AITC	AITC	8	0.1463
24	100uM AITC	AITC	9	0.531437
24	100uM AITC	AITC	10	0.851347
24	100uM AITC	AITC	11	0.80351
24	100uM AITC	AITC	12	0.3308
24	100uM AITC	AITC	13	0.679198
24	100uM AITC	AITC	14	0.495265
24	100uM AITC	AITC	15	0.750867
24	100uM AITC	AITC	16	0.804187
24	100uM AITC	AITC	17	0.285043
24	100uM AITC	AITC	18	0.320807
24	100uM AITC	AITC	19	0.667065
24	100uM AITC	AITC	20	0.391427
25	100uM AITC	AITC	0	0.963851
25	100uM AITC	AITC	1	3.29742
25	100uM AITC	AITC	2	2.83888
25	100uM AITC	AITC	3	1.22821
25	100uM AITC	AITC	4	2.26248
25	100uM AITC	AITC	5	0.435063
25	100uM AITC	AITC	6	0.882268
25	100uM AITC	AITC	7	0.867728
25	100uM AITC	AITC	8	0.642357
25	100uM AITC	AITC	9	1.04826
25	100uM AITC	AITC	10	0.575638
25	100uM AITC	AITC	11	0.780867
25	100uM AITC	AITC	12	0.320177
25	100uM AITC	AITC	13	0.644383
25	100uM AITC	AITC	14	0.85084
25	100uM AITC	AITC	15	0.59207
25	100uM AITC	AITC	16	0.682332
25	100uM AITC	AITC	17	0.48966
25	100uM AITC	AITC	18	0.59825
25	100uM AITC	AITC	19	0.549873
25	100uM AITC	AITC	20	0.477257
26	100uM AITC	AITC	0	1.14352
26	100uM AITC	AITC	1	3.26727
26	100uM AITC	AITC	2	4.50063
26	100uM AITC	AITC	3	1.65762
26	100uM AITC	AITC	4	2.4405
26	100uM AITC	AITC	5	1.18462
26	100uM AITC	AITC	6	0.957615
26	100uM AITC	AITC	7	1.08422
26	100uM AITC	AITC	8	0.445627
26	100uM AITC	AITC	9	0.448557
26	100uM AITC	AITC	10	1.29387
26	100uM AITC	AITC	11	0.298507
26	100uM AITC	AITC	12	0.532217
26	100uM AITC	AITC	13	0.482397
26	100uM AITC	AITC	14	2.22605
26	100uM AITC	AITC	15	0.0644382
26	100uM AITC	AITC	16	0.0509005
26	100uM AITC	AITC	17	0.0531827
26	100uM AITC	AITC	18	0.0325903
26	100uM AITC	AITC	19	0.031816
26	100uM AITC	AITC	20	0.0681327
27	100uM AITC	AITC	0	0.177563
27	100uM AITC	AITC	1	3.25363
27	100uM AITC	AITC	2	1.20456
27	100uM AITC	AITC	3	1.86385
27	100uM AITC	AITC	4	0.193692
27	100uM AITC	AITC	5	0.155094
27	100uM AITC	AITC	6	0.109734
27	100uM AITC	AITC	7	0.0816985
27	100uM AITC	AITC	8	0.0383363
27	100uM AITC	AITC	9	0.0430703
27	100uM AITC	AITC	10	0.045505
27	100uM AITC	AITC	11	0.0353097
27	100uM AITC	AITC	12	0.0449428
27	100uM AITC	AITC	13	0.529515
27	100uM AITC	AITC	14	1.53356
27	100uM AITC	AITC	15	0.0846818
27	100uM AITC	AITC	16	0.026305
27	100uM AITC	AITC	17	0.0358928
27	100uM AITC	AITC	18	0.0329052
27	100uM AITC	AITC	19	0.0257215
27	100uM AITC	AITC	20	0.0418877
28	100uM AITC	AITC	0	0.420484
28	100uM AITC	AITC	1	3.9418
28	100uM AITC	AITC	2	1.5742
28	100uM AITC	AITC	3	1.49016
28	100uM AITC	AITC	4	1.06391
28	100uM AITC	AITC	5	0.205128
28	100uM AITC	AITC	6	0.624178
28	100uM AITC	AITC	7	0.892442
28	100uM AITC	AITC	8	0.6111
28	100uM AITC	AITC	9	0.757625
28	100uM AITC	AITC	10	0.7019
28	100uM AITC	AITC	11	0.813
28	100uM AITC	AITC	12	0.87014
28	100uM AITC	AITC	13	0.838205
28	100uM AITC	AITC	14	1.12663
28	100uM AITC	AITC	15	0.64227
28	100uM AITC	AITC	16	0.761893
28	100uM AITC	AITC	17	0.60915
28	100uM AITC	AITC	18	0.628973
28	100uM AITC	AITC	19	0.646855
28	100uM AITC	AITC	20	0.673212
29	100uM AITC	AITC	0	1.77425
29	100uM AITC	AITC	1	4.2052
29	100uM AITC	AITC	2	0.88795
29	100uM AITC	AITC	3	0.0276608
29	100uM AITC	AITC	4	0.0347325
29	100uM AITC	AITC	5	0.780733
29	100uM AITC	AITC	6	0.632398
29	100uM AITC	AITC	7	0.248575
29	100uM AITC	AITC	8	1.34676
29	100uM AITC	AITC	9	0.429287
29	100uM AITC	AITC	10	0.148625
29	100uM AITC	AITC	11	0.0659788
29	100uM AITC	AITC	12	0.0484962
29	100uM AITC	AITC	13	1.18226
29	100uM AITC	AITC	14	0.182067
29	100uM AITC	AITC	15	0.0629078
29	100uM AITC	AITC	16	0.105829
29	100uM AITC	AITC	17	0.0641397
29	100uM AITC	AITC	18	0.0618438
29	100uM AITC	AITC	19	0.0472265
29	100uM AITC	AITC	20	0.0658302
30	100uM AITC	AITC	0	0.314107
30	100uM AITC	AITC	1	0.991617
30	100uM AITC	AITC	2	0.953653
30	100uM AITC	AITC	3	0.433132
30	100uM AITC	AITC	4	0.208985
30	100uM AITC	AITC	5	0.129206
30	100uM AITC	AITC	6	0.0413827
30	100uM AITC	AITC	7	0.0680375
30	100uM AITC	AITC	8	0.0311795
30	100uM AITC	AITC	9	0.0278593
30	100uM AITC	AITC	10	0.100555
30	100uM AITC	AITC	11	0.10354
30	100uM AITC	AITC	12	0.0929738
30	100uM AITC	AITC	13	0.114565
30	100uM AITC	AITC	14	0.10443
30	100uM AITC	AITC	15	0.105319
30	100uM AITC	AITC	16	0.0925398
30	100uM AITC	AITC	17	0.068445
30	100uM AITC	AITC	18	0.125579
30	100uM AITC	AITC	19	0.0601707
30	100uM AITC	AITC	20	0.363863
31	100uM AITC	AITC	0	1.09576
31	100uM AITC	AITC	1	3.05887
31	100uM AITC	AITC	2	1.82288
31	100uM AITC	AITC	3	1.33801
31	100uM AITC	AITC	4	0.251747
31	100uM AITC	AITC	5	0.133034
31	100uM AITC	AITC	6	0.17175
31	100uM AITC	AITC	7	0.205497
31	100uM AITC	AITC	8	0.356355
31	100uM AITC	AITC	9	0.265288
31	100uM AITC	AITC	10	0.363182
31	100uM AITC	AITC	11	0.314917
31	100uM AITC	AITC	12	0.246022
31	100uM AITC	AITC	13	0.243745
31	100uM AITC	AITC	14	0.228028
31	100uM AITC	AITC	15	0.321882
31	100uM AITC	AITC	16	0.263073
31	100uM AITC	AITC	17	0.361357
31	100uM AITC	AITC	18	0.364285
31	100uM AITC	AITC	19	0.300273
31	100uM AITC	AITC	20	0.237433
32	100uM AITC	AITC	0	0.306824
32	100uM AITC	AITC	1	3.07138
32	100uM AITC	AITC	2	2.5167
32	100uM AITC	AITC	3	2.24418
32	100uM AITC	AITC	4	1.03449
32	100uM AITC	AITC	5	0.159825
32	100uM AITC	AITC	6	0.325313
32	100uM AITC	AITC	7	0.284287
32	100uM AITC	AITC	8	0.668743
32	100uM AITC	AITC	9	0.347778
32	100uM AITC	AITC	10	0.405365
32	100uM AITC	AITC	11	0.383898
32	100uM AITC	AITC	12	0.332663
32	100uM AITC	AITC	13	0.682662
32	100uM AITC	AITC	14	0.34569
32	100uM AITC	AITC	15	0.622007
32	100uM AITC	AITC	16	0.209028
32	100uM AITC	AITC	17	0.330793
32	100uM AITC	AITC	18	0.460448
32	100uM AITC	AITC	19	0.37079
32	100uM AITC	AITC	20	0.322357
33	100uM AITC	AITC	0	1.33935
33	100uM AITC	AITC	1	2.53778
33	100uM AITC	AITC	2	1.36419
33	100uM AITC	AITC	3	0.697682
33	100uM AITC	AITC	4	0.033401
33	100uM AITC	AITC	5	0.0850693
33	100uM AITC	AITC	6	0.0740698
33	100uM AITC	AITC	7	0.0786752
33	100uM AITC	AITC	8	0.0733843
33	100uM AITC	AITC	9	0.17376
33	100uM AITC	AITC	10	0.143197
33	100uM AITC	AITC	11	0.214513
33	100uM AITC	AITC	12	0.0619798
33	100uM AITC	AITC	13	0.0403592
33	100uM AITC	AITC	14	0.0436015
33	100uM AITC	AITC	15	0.0468743
33	100uM AITC	AITC	16	0.0494168
33	100uM AITC	AITC	17	0.0445883
33	100uM AITC	AITC	18	0.0447197
33	100uM AITC	AITC	19	0.043005
33	100uM AITC	AITC	20	0.0686735
34	100uM AITC	AITC	0	1.87394
34	100uM AITC	AITC	1	3.6747
34	100uM AITC	AITC	2	3.0855
34	100uM AITC	AITC	3	2.3973
34	100uM AITC	AITC	4	0.985125
34	100uM AITC	AITC	5	0.117203
34	100uM AITC	AITC	6	0.0739055
34	100uM AITC	AITC	7	0.0775863
34	100uM AITC	AITC	8	0.19067
34	100uM AITC	AITC	9	0.175478
34	100uM AITC	AITC	10	0.203677
34	100uM AITC	AITC	11	0.140779
34	100uM AITC	AITC	12	0.236077
34	100uM AITC	AITC	13	0.120895
34	100uM AITC	AITC	14	0.19184
34	100uM AITC	AITC	15	0.174242
34	100uM AITC	AITC	16	0.449513
34	100uM AITC	AITC	17	0.446642
34	100uM AITC	AITC	18	0.555743
34	100uM AITC	AITC	19	0.4595
34	100uM AITC	AITC	20	0.416483
35	100uM AITC	AITC	0	0.738959
35	100uM AITC	AITC	1	3.57483
35	100uM AITC	AITC	2	1.91553
35	100uM AITC	AITC	3	1.33025
35	100uM AITC	AITC	4	0.0547567
35	100uM AITC	AITC	5	0.220015
35	100uM AITC	AITC	6	0.574362
35	100uM AITC	AITC	7	0.213402
35	100uM AITC	AITC	8	0.36466
35	100uM AITC	AITC	9	0.290937
35	100uM AITC	AITC	10	0.253817
35	100uM AITC	AITC	11	0.0510625
35	100uM AITC	AITC	12	0.0756558
35	100uM AITC	AITC	13	0.0700042
35	100uM AITC	AITC	14	0.218867
35	100uM AITC	AITC	15	0.217173
35	100uM AITC	AITC	16	0.20772
35	100uM AITC	AITC	17	0.145355
35	100uM AITC	AITC	18	0.104794
35	100uM AITC	AITC	19	0.120765
35	100uM AITC	AITC	20	0.169547
36	100uM AITC	AITC	0	0.104433
36	100uM AITC	AITC	1	4.26277
36	100uM AITC	AITC	2	2.73023
36	100uM AITC	AITC	3	1.974
36	100uM AITC	AITC	4	0.862057
36	100uM AITC	AITC	5	0.0677997
36	100uM AITC	AITC	6	0.0518842
36	100uM AITC	AITC	7	0.0537173
36	100uM AITC	AITC	8	0.0500278
36	100uM AITC	AITC	9	0.0543295
36	100uM AITC	AITC	10	0.0503112
36	100uM AITC	AITC	11	0.0404527
36	100uM AITC	AITC	12	0.0433498
36	100uM AITC	AITC	13	0.0417643
36	100uM AITC	AITC	14	0.0438433
36	100uM AITC	AITC	15	0.04388
36	100uM AITC	AITC	16	0.0511615
36	100uM AITC	AITC	17	0.16724
36	100uM AITC	AITC	18	0.127878
36	100uM AITC	AITC	19	0.0414972
36	100uM AITC	AITC	20	0.0397548
37	100uM AITC	AITC	0	0.750491
37	100uM AITC	AITC	1	2.20625
37	100uM AITC	AITC	2	2.491
37	100uM AITC	AITC	3	2.20253
37	100uM AITC	AITC	4	1.50204
37	100uM AITC	AITC	5	0.955365
37	100uM AITC	AITC	6	0.543827
37	100uM AITC	AITC	7	0.219628
37	100uM AITC	AITC	8	0.191582
37	100uM AITC	AITC	9	0.0801237
37	100uM AITC	AITC	10	0.126631
37	100uM AITC	AITC	11	0.0932602
37	100uM AITC	AITC	12	0.529888
37	100uM AITC	AITC	13	0.859095
37	100uM AITC	AITC	14	0.779523
37	100uM AITC	AITC	15	0.647978
37	100uM AITC	AITC	16	0.620745
37	100uM AITC	AITC	17	0.67266
37	100uM AITC	AITC	18	0.583228
37	100uM AITC	AITC	19	0.663687
37	100uM AITC	AITC	20	0.488218
38	100uM AITC	AITC	0	0.660101
38	100uM AITC	AITC	1	0.483093
38	100uM AITC	AITC	2	0.0998795
38	100uM AITC	AITC	3	1.43923
38	100uM AITC	AITC	4	2.22402
38	100uM AITC	AITC	5	1.66347
38	100uM AITC	AITC	6	0.99994
38	100uM AITC	AITC	7	0.416712
38	100uM AITC	AITC	8	0.19644
38	100uM AITC	AITC	9	0.110898
38	100uM AITC	AITC	10	0.139756
38	100uM AITC	AITC	11	0.111565
38	100uM AITC	AITC	12	0.161754
38	100uM AITC	AITC	13	0.112996
38	100uM AITC	AITC	14	0.0280948
38	100uM AITC	AITC	15	0.0287915
38	100uM AITC	AITC	16	0.0236487
38	100uM AITC	AITC	17	0.024277
38	100uM AITC	AITC	18	0.0202338
38	100uM AITC	AITC	19	0.0175982
38	100uM AITC	AITC	20	0.0181537
39	100uM AITC	AITC	0	0.706443
39	100uM AITC	AITC	1	3.0009
39	100uM AITC	AITC	2	2.07345
39	100uM AITC	AITC	3	1.39737
39	100uM AITC	AITC	4	0.6025
39	100uM AITC	AITC	5	0.103299
39	100uM AITC	AITC	6	0.347255
39	100uM AITC	AITC	7	0.0469615
39	100uM AITC	AITC	8	0.121496
39	100uM AITC	AITC	9	0.124413
39	100uM AITC	AITC	10	0.160426
39	100uM AITC	AITC	11	0.200005
39	100uM AITC	AITC	12	0.312643
39	100uM AITC	AITC	13	0.28257
39	100uM AITC	AITC	14	0.202263
39	100uM AITC	AITC	15	0.313943
39	100uM AITC	AITC	16	0.233348
39	100uM AITC	AITC	17	0.341522
39	100uM AITC	AITC	18	0.285598
39	100uM AITC	AITC	19	0.138479
39	100uM AITC	AITC	20	0.288418
40	100uM AITC	AITC	0	0.602975
40	100uM AITC	AITC	1	3.0226
40	100uM AITC	AITC	2	1.80277
40	100uM AITC	AITC	3	0.341943
40	100uM AITC	AITC	4	0.058658
40	100uM AITC	AITC	5	0.106794
40	100uM AITC	AITC	6	0.147562
40	100uM AITC	AITC	7	0.0617335
40	100uM AITC	AITC	8	0.0610475
40	100uM AITC	AITC	9	0.123041
40	100uM AITC	AITC	10	0.122164
40	100uM AITC	AITC	11	0.0623023
40	100uM AITC	AITC	12	0.116005
40	100uM AITC	AITC	13	0.151939
40	100uM AITC	AITC	14	0.162096
40	100uM AITC	AITC	15	0.140011
40	100uM AITC	AITC	16	0.136529
40	100uM AITC	AITC	17	0.092518
40	100uM AITC	AITC	18	0.06225
40	100uM AITC	AITC	19	0.070287
40	100uM AITC	AITC	20	0.0736422
41	100uM AITC	AITC	0	1.11648
41	100uM AITC	AITC	1	2.85988
41	100uM AITC	AITC	2	2.71798
41	100uM AITC	AITC	3	0.905885
41	100uM AITC	AITC	4	0.533138
41	100uM AITC	AITC	5	0.415852
41	100uM AITC	AITC	6	0.0857175
41	100uM AITC	AITC	7	0.0429985
41	100uM AITC	AITC	8	0.0357607
41	100uM AITC	AITC	9	0.0300652
41	100uM AITC	AITC	10	0.0729715
41	100uM AITC	AITC	11	0.0770832
41	100uM AITC	AITC	12	0.0603337
41	100uM AITC	AITC	13	0.0463802
41	100uM AITC	AITC	14	0.172968
41	100uM AITC	AITC	15	0.273975
41	100uM AITC	AITC	16	0.445233
41	100uM AITC	AITC	17	0.47298
41	100uM AITC	AITC	18	0.168568
41	100uM AITC	AITC	19	0.357745
41	100uM AITC	AITC	20	0.33495
42	100uM AITC	AITC	0	1.76882
42	100uM AITC	AITC	1	2.12105
42	100uM AITC	AITC	2	1.11101
42	100uM AITC	AITC	3	0.0268518
42	100uM AITC	AITC	4	0.0332923
42	100uM AITC	AITC	5	0.034076
42	100uM AITC	AITC	6	0.037632
42	100uM AITC	AITC	7	0.107997
42	100uM AITC	AITC	8	0.745853
42	100uM AITC	AITC	9	0.261413
42	100uM AITC	AITC	10	0.756143
42	100uM AITC	AITC	11	0.651453
42	100uM AITC	AITC	12	0.167533
42	100uM AITC	AITC	13	0.0439907
42	100uM AITC	AITC	14	0.0714587
42	100uM AITC	AITC	15	0.130392
42	100uM AITC	AITC	16	0.225585
42	100uM AITC	AITC	17	0.124904
42	100uM AITC	AITC	18	0.8888
42	100uM AITC	AITC	19	1.0892
42	100uM AITC	AITC	20	1.11538
43	100uM AITC	AITC	0	0.921725
43	100uM AITC	AITC	1	2.20585
43	100uM AITC	AITC	2	2.69105
43	100uM AITC	AITC	3	0.987977
43	100uM AITC	AITC	4	0.041475
43	100uM AITC	AITC	5	0.0430623
43	100uM AITC	AITC	6	0.0416392
43	100uM AITC	AITC	7	0.042832
43	100uM AITC	AITC	8	0.0597532
43	100uM AITC	AITC	9	0.194327
43	100uM AITC	AITC	10	0.178238
43	100uM AITC	AITC	11	0.0608468
43	100uM AITC	AITC	12	0.0606935
43	100uM AITC	AITC	13	0.103755
43	100uM AITC	AITC	14	0.180137
43	100uM AITC	AITC	15	0.131492
43	100uM AITC	AITC	16	0.0849
43	100uM AITC	AITC	17	0.0749182
43	100uM AITC	AITC	18	0.113992
43	100uM AITC	AITC	19	0.108063
43	100uM AITC	AITC	20	0.0790913
44	100uM AITC	AITC	0	0.477555
44	100uM AITC	AITC	1	1.67978
44	100uM AITC	AITC	2	1.80138
44	100uM AITC	AITC	3	1.26504
44	100uM AITC	AITC	4	1.03673
44	100uM AITC	AITC	5	1.0285
44	100uM AITC	AITC	6	1.0197
44	100uM AITC	AITC	7	1.04001
44	100uM AITC	AITC	8	0.0650925
44	100uM AITC	AITC	9	0.105086
44	100uM AITC	AITC	10	1.08518
44	100uM AITC	AITC	11	0.51944
44	100uM AITC	AITC	12	0.384245
44	100uM AITC	AITC	13	0.259795
44	100uM AITC	AITC	14	0.5143
44	100uM AITC	AITC	15	0.470877
44	100uM AITC	AITC	16	0.498978
44	100uM AITC	AITC	17	0.179237
44	100uM AITC	AITC	18	0.409837
44	100uM AITC	AITC	19	0.539465
44	100uM AITC	AITC	20	0.26898
45	100uM AITC	AITC	0	0.123488
45	100uM AITC	AITC	1	2.17467
45	100uM AITC	AITC	2	3.30777
45	100uM AITC	AITC	3	1.67117
45	100uM AITC	AITC	4	1.40799
45	100uM AITC	AITC	5	0.496303
45	100uM AITC	AITC	6	0.189757
45	100uM AITC	AITC	7	0.127181
45	100uM AITC	AITC	8	0.0908463
45	100uM AITC	AITC	9	0.0720748
45	100uM AITC	AITC	10	0.286615
45	100uM AITC	AITC	11	0.632012
45	100uM AITC	AITC	12	0.576367
45	100uM AITC	AITC	13	0.24128
45	100uM AITC	AITC	14	0.228677
45	100uM AITC	AITC	15	0.312803
45	100uM AITC	AITC	16	0.354905
45	100uM AITC	AITC	17	0.373778
45	100uM AITC	AITC	18	0.423765
45	100uM AITC	AITC	19	0.586785
45	100uM AITC	AITC	20	0.169765
46	100uM AITC + 6uM Fentanyl	AITC-Fent	0	1.29817
46	100uM AITC + 6uM Fentanyl	AITC-Fent	1	0.277067
46	100uM AITC + 6uM Fentanyl	AITC-Fent	2	0.678033
46	100uM AITC + 6uM Fentanyl	AITC-Fent	3	1.35339
46	100uM AITC + 6uM Fentanyl	AITC-Fent	4	0.182
46	100uM AITC + 6uM Fentanyl	AITC-Fent	5	0.0590755
46	100uM AITC + 6uM Fentanyl	AITC-Fent	6	0.0413223
46	100uM AITC + 6uM Fentanyl	AITC-Fent	7	0.0409985
46	100uM AITC + 6uM Fentanyl	AITC-Fent	8	0.0653722
46	100uM AITC + 6uM Fentanyl	AITC-Fent	9	0.0475477
46	100uM AITC + 6uM Fentanyl	AITC-Fent	10	0.305402
46	100uM AITC + 6uM Fentanyl	AITC-Fent	11	0.374368
46	100uM AITC + 6uM Fentanyl	AITC-Fent	12	0.204132
46	100uM AITC + 6uM Fentanyl	AITC-Fent	13	0.048452
46	100uM AITC + 6uM Fentanyl	AITC-Fent	14	0.0482127
46	100uM AITC + 6uM Fentanyl	AITC-Fent	15	0.0544712
46	100uM AITC + 6uM Fentanyl	AITC-Fent	16	0.2382
46	100uM AITC + 6uM Fentanyl	AITC-Fent	17	0.090681
46	100uM AITC + 6uM Fentanyl	AITC-Fent	18	0.223012
46	100uM AITC + 6uM Fentanyl	AITC-Fent	19	0.0591548
46	100uM AITC + 6uM Fentanyl	AITC-Fent	20	0.0528447
47	100uM AITC + 6uM Fentanyl	AITC-Fent	0	1.58246
47	100uM AITC + 6uM Fentanyl	AITC-Fent	1	0.640755
47	100uM AITC + 6uM Fentanyl	AITC-Fent	2	0.664168
47	100uM AITC + 6uM Fentanyl	AITC-Fent	3	0.894918
47	100uM AITC + 6uM Fentanyl	AITC-Fent	4	0.193557
47	100uM AITC + 6uM Fentanyl	AITC-Fent	5	0.115799
47	100uM AITC + 6uM Fentanyl	AITC-Fent	6	0.0693412
47	100uM AITC + 6uM Fentanyl	AITC-Fent	7	0.0654482
47	100uM AITC + 6uM Fentanyl	AITC-Fent	8	0.0685288
47	100uM AITC + 6uM Fentanyl	AITC-Fent	9	0.0661265
47	100uM AITC + 6uM Fentanyl	AITC-Fent	10	0.265333
47	100uM AITC + 6uM Fentanyl	AITC-Fent	11	0.164484
47	100uM AITC + 6uM Fentanyl	AITC-Fent	12	0.172805
47	100uM AITC + 6uM Fentanyl	AITC-Fent	13	0.0698243
47	100uM AITC + 6uM Fentanyl	AITC-Fent	14	0.0807365
47	100uM AITC + 6uM Fentanyl	AITC-Fent	15	0.0887598
47	100uM AITC + 6uM Fentanyl	AITC-Fent	16	0.247773
47	100uM AITC + 6uM Fentanyl	AITC-Fent	17	0.19533
47	100uM AITC + 6uM Fentanyl	AITC-Fent	18	0.263298
47	100uM AITC + 6uM Fentanyl	AITC-Fent	19	0.0644838
47	100uM AITC + 6uM Fentanyl	AITC-Fent	20	0.0540303
49	100uM AITC + 6uM Fentanyl	AITC-Fent	0	1.01607
49	100uM AITC + 6uM Fentanyl	AITC-Fent	1	0.296647
49	100uM AITC + 6uM Fentanyl	AITC-Fent	2	0.325897
49	100uM AITC + 6uM Fentanyl	AITC-Fent	3	0.870088
49	100uM AITC + 6uM Fentanyl	AITC-Fent	4	0.132025
49	100uM AITC + 6uM Fentanyl	AITC-Fent	5	0.0448703
49	100uM AITC + 6uM Fentanyl	AITC-Fent	6	0.061564
49	100uM AITC + 6uM Fentanyl	AITC-Fent	7	0.0484327
49	100uM AITC + 6uM Fentanyl	AITC-Fent	8	0.0496773
49	100uM AITC + 6uM Fentanyl	AITC-Fent	9	0.0440257
49	100uM AITC + 6uM Fentanyl	AITC-Fent	10	0.219843
49	100uM AITC + 6uM Fentanyl	AITC-Fent	11	0.232442
49	100uM AITC + 6uM Fentanyl	AITC-Fent	12	0.14133
49	100uM AITC + 6uM Fentanyl	AITC-Fent	13	0.0390677
49	100uM AITC + 6uM Fentanyl	AITC-Fent	14	0.041424
49	100uM AITC + 6uM Fentanyl	AITC-Fent	15	0.0462742
49	100uM AITC + 6uM Fentanyl	AITC-Fent	16	0.113469
49	100uM AITC + 6uM Fentanyl	AITC-Fent	17	0.0925733
49	100uM AITC + 6uM Fentanyl	AITC-Fent	18	0.20076
49	100uM AITC + 6uM Fentanyl	AITC-Fent	19	0.052384
49	100uM AITC + 6uM Fentanyl	AITC-Fent	20	0.0449703
50	100uM AITC + 6uM Fentanyl	AITC-Fent	0	0.933464
50	100uM AITC + 6uM Fentanyl	AITC-Fent	1	0.0572948
50	100uM AITC + 6uM Fentanyl	AITC-Fent	2	0.089277
50	100uM AITC + 6uM Fentanyl	AITC-Fent	3	0.0263182
50	100uM AITC + 6uM Fentanyl	AITC-Fent	4	0.128971
50	100uM AITC + 6uM Fentanyl	AITC-Fent	5	0.0646298
50	100uM AITC + 6uM Fentanyl	AITC-Fent	6	0.0686558
50	100uM AITC + 6uM Fentanyl	AITC-Fent	7	0.0678123
50	100uM AITC + 6uM Fentanyl	AITC-Fent	8	0.0659313
50	100uM AITC + 6uM Fentanyl	AITC-Fent	9	0.0650992
50	100uM AITC + 6uM Fentanyl	AITC-Fent	10	0.268315
50	100uM AITC + 6uM Fentanyl	AITC-Fent	11	0.261003
50	100uM AITC + 6uM Fentanyl	AITC-Fent	12	0.179582
50	100uM AITC + 6uM Fentanyl	AITC-Fent	13	0.0639068
50	100uM AITC + 6uM Fentanyl	AITC-Fent	14	0.0637308
50	100uM AITC + 6uM Fentanyl	AITC-Fent	15	0.067809
50	100uM AITC + 6uM Fentanyl	AITC-Fent	16	0.18876
50	100uM AITC + 6uM Fentanyl	AITC-Fent	17	0.134081
50	100uM AITC + 6uM Fentanyl	AITC-Fent	18	0.312087
50	100uM AITC + 6uM Fentanyl	AITC-Fent	19	0.084466
50	100uM AITC + 6uM Fentanyl	AITC-Fent	20	0.0832958
51	100uM AITC + 6uM Fentanyl	AITC-Fent	0	1.25799
51	100uM AITC + 6uM Fentanyl	AITC-Fent	1	0.335928
51	100uM AITC + 6uM Fentanyl	AITC-Fent	2	1.0503
51	100uM AITC + 6uM Fentanyl	AITC-Fent	3	0.877982
51	100uM AITC + 6uM Fentanyl	AITC-Fent	4	0.722882
51	100uM AITC + 6uM Fentanyl	AITC-Fent	5	0.161877
51	100uM AITC + 6uM Fentanyl	AITC-Fent	6	0.159702
51	100uM AITC + 6uM Fentanyl	AITC-Fent	7	0.126477
51	100uM AITC + 6uM Fentanyl	AITC-Fent	8	0.17136
51	100uM AITC + 6uM Fentanyl	AITC-Fent	9	0.119604
51	100uM AITC + 6uM Fentanyl	AITC-Fent	10	0.402578
51	100uM AITC + 6uM Fentanyl	AITC-Fent	11	0.25546
51	100uM AITC + 6uM Fentanyl	AITC-Fent	12	0.302728
51	100uM AITC + 6uM Fentanyl	AITC-Fent	13	0.152301
51	100uM AITC + 6uM Fentanyl	AITC-Fent	14	0.136985
51	100uM AITC + 6uM Fentanyl	AITC-Fent	15	0.152471
51	100uM AITC + 6uM Fentanyl	AITC-Fent	16	0.889653
51	100uM AITC + 6uM Fentanyl	AITC-Fent	17	0.42228
51	100uM AITC + 6uM Fentanyl	AITC-Fent	18	0.784455
51	100uM AITC + 6uM Fentanyl	AITC-Fent	19	0.35958
51	100uM AITC + 6uM Fentanyl	AITC-Fent	20	0.321678
52	100uM AITC + 6uM Fentanyl	AITC-Fent	0	0.14722
52	100uM AITC + 6uM Fentanyl	AITC-Fent	1	0.885035
52	100uM AITC + 6uM Fentanyl	AITC-Fent	2	0.728187
52	100uM AITC + 6uM Fentanyl	AITC-Fent	3	0.406468
52	100uM AITC + 6uM Fentanyl	AITC-Fent	4	0.305717
52	100uM AITC + 6uM Fentanyl	AITC-Fent	5	0.0526107
52	100uM AITC + 6uM Fentanyl	AITC-Fent	6	0.0594893
52	100uM AITC + 6uM Fentanyl	AITC-Fent	7	0.0671702
52	100uM AITC + 6uM Fentanyl	AITC-Fent	8	0.0573905
52	100uM AITC + 6uM Fentanyl	AITC-Fent	9	0.0936717
52	100uM AITC + 6uM Fentanyl	AITC-Fent	10	0.248743
52	100uM AITC + 6uM Fentanyl	AITC-Fent	11	0.153223
52	100uM AITC + 6uM Fentanyl	AITC-Fent	12	0.178388
52	100uM AITC + 6uM Fentanyl	AITC-Fent	13	0.0645128
52	100uM AITC + 6uM Fentanyl	AITC-Fent	14	0.0597225
52	100uM AITC + 6uM Fentanyl	AITC-Fent	15	0.0634127
52	100uM AITC + 6uM Fentanyl	AITC-Fent	16	0.163303
52	100uM AITC + 6uM Fentanyl	AITC-Fent	17	0.15589
52	100uM AITC + 6uM Fentanyl	AITC-Fent	18	0.281088
52	100uM AITC + 6uM Fentanyl	AITC-Fent	19	0.0520635
52	100uM AITC + 6uM Fentanyl	AITC-Fent	20	0.0469107
53	100uM AITC + 6uM Fentanyl	AITC-Fent	0	0.59129
53	100uM AITC + 6uM Fentanyl	AITC-Fent	1	0.318237
53	100uM AITC + 6uM Fentanyl	AITC-Fent	2	0.0591105
53	100uM AITC + 6uM Fentanyl	AITC-Fent	3	0.0876987
53	100uM AITC + 6uM Fentanyl	AITC-Fent	4	0.152337
53	100uM AITC + 6uM Fentanyl	AITC-Fent	5	0.125116
53	100uM AITC + 6uM Fentanyl	AITC-Fent	6	0.119821
53	100uM AITC + 6uM Fentanyl	AITC-Fent	7	0.121665
53	100uM AITC + 6uM Fentanyl	AITC-Fent	8	0.120963
53	100uM AITC + 6uM Fentanyl	AITC-Fent	9	0.118629
53	100uM AITC + 6uM Fentanyl	AITC-Fent	10	0.468087
53	100uM AITC + 6uM Fentanyl	AITC-Fent	11	0.222098
53	100uM AITC + 6uM Fentanyl	AITC-Fent	12	0.222053
53	100uM AITC + 6uM Fentanyl	AITC-Fent	13	0.125802
53	100uM AITC + 6uM Fentanyl	AITC-Fent	14	0.130812
53	100uM AITC + 6uM Fentanyl	AITC-Fent	15	0.128033
53	100uM AITC + 6uM Fentanyl	AITC-Fent	16	0.255065
53	100uM AITC + 6uM Fentanyl	AITC-Fent	17	0.290487
53	100uM AITC + 6uM Fentanyl	AITC-Fent	18	0.30873
53	100uM AITC + 6uM Fentanyl	AITC-Fent	19	0.0706867
53	100uM AITC + 6uM Fentanyl	AITC-Fent	20	0.0667362
54	100uM AITC + 6uM Fentanyl	AITC-Fent	0	0.409131
54	100uM AITC + 6uM Fentanyl	AITC-Fent	1	0.80874
54	100uM AITC + 6uM Fentanyl	AITC-Fent	2	0.060084
54	100uM AITC + 6uM Fentanyl	AITC-Fent	3	0.143892
54	100uM AITC + 6uM Fentanyl	AITC-Fent	4	0.352007
54	100uM AITC + 6uM Fentanyl	AITC-Fent	5	0.118096
54	100uM AITC + 6uM Fentanyl	AITC-Fent	6	0.121862
54	100uM AITC + 6uM Fentanyl	AITC-Fent	7	0.116106
54	100uM AITC + 6uM Fentanyl	AITC-Fent	8	0.112823
54	100uM AITC + 6uM Fentanyl	AITC-Fent	9	0.107821
54	100uM AITC + 6uM Fentanyl	AITC-Fent	10	0.39256
54	100uM AITC + 6uM Fentanyl	AITC-Fent	11	0.236025
54	100uM AITC + 6uM Fentanyl	AITC-Fent	12	0.3903
54	100uM AITC + 6uM Fentanyl	AITC-Fent	13	0.112175
54	100uM AITC + 6uM Fentanyl	AITC-Fent	14	0.102596
54	100uM AITC + 6uM Fentanyl	AITC-Fent	15	0.097902
54	100uM AITC + 6uM Fentanyl	AITC-Fent	16	0.185955
54	100uM AITC + 6uM Fentanyl	AITC-Fent	17	0.642452
54	100uM AITC + 6uM Fentanyl	AITC-Fent	18	0.53603
54	100uM AITC + 6uM Fentanyl	AITC-Fent	19	0.238993
54	100uM AITC + 6uM Fentanyl	AITC-Fent	20	0.229978
55	100uM AITC + 6uM Fentanyl	AITC-Fent	0	1.83684
55	100uM AITC + 6uM Fentanyl	AITC-Fent	1	0.263072
55	100uM AITC + 6uM Fentanyl	AITC-Fent	2	1.60769
55	100uM AITC + 6uM Fentanyl	AITC-Fent	3	0.959703
55	100uM AITC + 6uM Fentanyl	AITC-Fent	4	0.269905
55	100uM AITC + 6uM Fentanyl	AITC-Fent	5	0.0940305
55	100uM AITC + 6uM Fentanyl	AITC-Fent	6	0.0841243
55	100uM AITC + 6uM Fentanyl	AITC-Fent	7	0.0788693
55	100uM AITC + 6uM Fentanyl	AITC-Fent	8	0.0865527
55	100uM AITC + 6uM Fentanyl	AITC-Fent	9	0.0701382
55	100uM AITC + 6uM Fentanyl	AITC-Fent	10	0.285428
55	100uM AITC + 6uM Fentanyl	AITC-Fent	11	0.166661
55	100uM AITC + 6uM Fentanyl	AITC-Fent	12	0.191155
55	100uM AITC + 6uM Fentanyl	AITC-Fent	13	0.0764887
55	100uM AITC + 6uM Fentanyl	AITC-Fent	14	0.108941
55	100uM AITC + 6uM Fentanyl	AITC-Fent	15	0.0923292
55	100uM AITC + 6uM Fentanyl	AITC-Fent	16	1.2364
55	100uM AITC + 6uM Fentanyl	AITC-Fent	17	0.938758
55	100uM AITC + 6uM Fentanyl	AITC-Fent	18	0.300243
55	100uM AITC + 6uM Fentanyl	AITC-Fent	19	0.055395
55	100uM AITC + 6uM Fentanyl	AITC-Fent	20	0.0644022
56	100uM AITC + 6uM Fentanyl	AITC-Fent	0	0.760377
56	100uM AITC + 6uM Fentanyl	AITC-Fent	1	1.05394
56	100uM AITC + 6uM Fentanyl	AITC-Fent	2	0.691882
56	100uM AITC + 6uM Fentanyl	AITC-Fent	3	0.369312
56	100uM AITC + 6uM Fentanyl	AITC-Fent	4	1.14412
56	100uM AITC + 6uM Fentanyl	AITC-Fent	5	0.971078
56	100uM AITC + 6uM Fentanyl	AITC-Fent	6	0.814523
56	100uM AITC + 6uM Fentanyl	AITC-Fent	7	0.755142
56	100uM AITC + 6uM Fentanyl	AITC-Fent	8	0.439198
56	100uM AITC + 6uM Fentanyl	AITC-Fent	9	0.712995
56	100uM AITC + 6uM Fentanyl	AITC-Fent	10	2.03375
56	100uM AITC + 6uM Fentanyl	AITC-Fent	11	0.783082
56	100uM AITC + 6uM Fentanyl	AITC-Fent	12	0.737872
56	100uM AITC + 6uM Fentanyl	AITC-Fent	13	0.455755
56	100uM AITC + 6uM Fentanyl	AITC-Fent	14	0.304657
56	100uM AITC + 6uM Fentanyl	AITC-Fent	15	0.852
56	100uM AITC + 6uM Fentanyl	AITC-Fent	16	0.669613
56	100uM AITC + 6uM Fentanyl	AITC-Fent	17	0.512988
56	100uM AITC + 6uM Fentanyl	AITC-Fent	18	0.652988
56	100uM AITC + 6uM Fentanyl	AITC-Fent	19	0.447503
56	100uM AITC + 6uM Fentanyl	AITC-Fent	20	0.0349502
57	100uM AITC + 6uM Fentanyl	AITC-Fent	0	0.297786
57	100uM AITC + 6uM Fentanyl	AITC-Fent	1	1.14406
57	100uM AITC + 6uM Fentanyl	AITC-Fent	2	0.472992
57	100uM AITC + 6uM Fentanyl	AITC-Fent	3	2.3667
57	100uM AITC + 6uM Fentanyl	AITC-Fent	4	1.13101
57	100uM AITC + 6uM Fentanyl	AITC-Fent	5	0.718015
57	100uM AITC + 6uM Fentanyl	AITC-Fent	6	0.150768
57	100uM AITC + 6uM Fentanyl	AITC-Fent	7	0.114732
57	100uM AITC + 6uM Fentanyl	AITC-Fent	8	0.300845
57	100uM AITC + 6uM Fentanyl	AITC-Fent	9	0.29105
57	100uM AITC + 6uM Fentanyl	AITC-Fent	10	0.17779
57	100uM AITC + 6uM Fentanyl	AITC-Fent	11	0.302378
57	100uM AITC + 6uM Fentanyl	AITC-Fent	12	0.494262
57	100uM AITC + 6uM Fentanyl	AITC-Fent	13	0.732562
57	100uM AITC + 6uM Fentanyl	AITC-Fent	14	0.362955
57	100uM AITC + 6uM Fentanyl	AITC-Fent	15	0.103681
57	100uM AITC + 6uM Fentanyl	AITC-Fent	16	0.0761915
57	100uM AITC + 6uM Fentanyl	AITC-Fent	17	0.120018
57	100uM AITC + 6uM Fentanyl	AITC-Fent	18	0.0784537
57	100uM AITC + 6uM Fentanyl	AITC-Fent	19	0.0718553
57	100uM AITC + 6uM Fentanyl	AITC-Fent	20	0.253695
58	100uM AITC + 6uM Fentanyl	AITC-Fent	0	1.10472
58	100uM AITC + 6uM Fentanyl	AITC-Fent	1	1.23094
58	100uM AITC + 6uM Fentanyl	AITC-Fent	2	1.01704
58	100uM AITC + 6uM Fentanyl	AITC-Fent	3	0.595382
58	100uM AITC + 6uM Fentanyl	AITC-Fent	4	0.360242
58	100uM AITC + 6uM Fentanyl	AITC-Fent	5	0.242777
58	100uM AITC + 6uM Fentanyl	AITC-Fent	6	0.666408
58	100uM AITC + 6uM Fentanyl	AITC-Fent	7	0.349385
58	100uM AITC + 6uM Fentanyl	AITC-Fent	8	0.295372
58	100uM AITC + 6uM Fentanyl	AITC-Fent	9	0.536353
58	100uM AITC + 6uM Fentanyl	AITC-Fent	10	1.23159
58	100uM AITC + 6uM Fentanyl	AITC-Fent	11	0.4914
58	100uM AITC + 6uM Fentanyl	AITC-Fent	12	0.444393
58	100uM AITC + 6uM Fentanyl	AITC-Fent	13	0.95245
58	100uM AITC + 6uM Fentanyl	AITC-Fent	14	0.575845
58	100uM AITC + 6uM Fentanyl	AITC-Fent	15	0.654912
58	100uM AITC + 6uM Fentanyl	AITC-Fent	16	0.336038
58	100uM AITC + 6uM Fentanyl	AITC-Fent	17	0.255367
58	100uM AITC + 6uM Fentanyl	AITC-Fent	18	0.33651
58	100uM AITC + 6uM Fentanyl	AITC-Fent	19	0.285425
58	100uM AITC + 6uM Fentanyl	AITC-Fent	20	0.489033
59	100uM AITC + 6uM Fentanyl	AITC-Fent	0	0.827772
59	100uM AITC + 6uM Fentanyl	AITC-Fent	1	3.01442
59	100uM AITC + 6uM Fentanyl	AITC-Fent	2	1.86773
59	100uM AITC + 6uM Fentanyl	AITC-Fent	3	2.77577
59	100uM AITC + 6uM Fentanyl	AITC-Fent	4	1.59396
59	100uM AITC + 6uM Fentanyl	AITC-Fent	5	0.45984
59	100uM AITC + 6uM Fentanyl	AITC-Fent	6	0.0966758
59	100uM AITC + 6uM Fentanyl	AITC-Fent	7	0.202942
59	100uM AITC + 6uM Fentanyl	AITC-Fent	8	0.692742
59	100uM AITC + 6uM Fentanyl	AITC-Fent	9	0.212742
59	100uM AITC + 6uM Fentanyl	AITC-Fent	10	0.376147
59	100uM AITC + 6uM Fentanyl	AITC-Fent	11	0.298007
59	100uM AITC + 6uM Fentanyl	AITC-Fent	12	0.31441
59	100uM AITC + 6uM Fentanyl	AITC-Fent	13	0.132338
59	100uM AITC + 6uM Fentanyl	AITC-Fent	14	0.137682
59	100uM AITC + 6uM Fentanyl	AITC-Fent	15	0.232602
59	100uM AITC + 6uM Fentanyl	AITC-Fent	16	0.218653
59	100uM AITC + 6uM Fentanyl	AITC-Fent	17	0.238802
59	100uM AITC + 6uM Fentanyl	AITC-Fent	18	0.168667
59	100uM AITC + 6uM Fentanyl	AITC-Fent	19	0.208765
59	100uM AITC + 6uM Fentanyl	AITC-Fent	20	0.169773
60	100uM AITC + 6uM Fentanyl	AITC-Fent	0	1.73565
60	100uM AITC + 6uM Fentanyl	AITC-Fent	1	0.232775
60	100uM AITC + 6uM Fentanyl	AITC-Fent	2	1.27579
60	100uM AITC + 6uM Fentanyl	AITC-Fent	3	1.49908
60	100uM AITC + 6uM Fentanyl	AITC-Fent	4	0.943708
60	100uM AITC + 6uM Fentanyl	AITC-Fent	5	0.630953
60	100uM AITC + 6uM Fentanyl	AITC-Fent	6	0.702708
60	100uM AITC + 6uM Fentanyl	AITC-Fent	7	0.819782
60	100uM AITC + 6uM Fentanyl	AITC-Fent	8	0.717837
60	100uM AITC + 6uM Fentanyl	AITC-Fent	9	0.200935
60	100uM AITC + 6uM Fentanyl	AITC-Fent	10	0.680665
60	100uM AITC + 6uM Fentanyl	AITC-Fent	11	0.386023
60	100uM AITC + 6uM Fentanyl	AITC-Fent	12	1.04624
60	100uM AITC + 6uM Fentanyl	AITC-Fent	13	1.42953
60	100uM AITC + 6uM Fentanyl	AITC-Fent	14	0.785877
60	100uM AITC + 6uM Fentanyl	AITC-Fent	15	0.260093
60	100uM AITC + 6uM Fentanyl	AITC-Fent	16	0.91236
60	100uM AITC + 6uM Fentanyl	AITC-Fent	17	0.788363
60	100uM AITC + 6uM Fentanyl	AITC-Fent	18	1.18879
60	100uM AITC + 6uM Fentanyl	AITC-Fent	19	0.745853
60	100uM AITC + 6uM Fentanyl	AITC-Fent	20	0.693162
61	100uM AITC + 6uM Fentanyl	AITC-Fent	0	1.57233
61	100uM AITC + 6uM Fentanyl	AITC-Fent	1	0.261075
61	100uM AITC + 6uM Fentanyl	AITC-Fent	2	0.575697
61	100uM AITC + 6uM Fentanyl	AITC-Fent	3	0.401363
61	100uM AITC + 6uM Fentanyl	AITC-Fent	4	0.433682
61	100uM AITC + 6uM Fentanyl	AITC-Fent	5	0.701383
61	100uM AITC + 6uM Fentanyl	AITC-Fent	6	0.50792
61	100uM AITC + 6uM Fentanyl	AITC-Fent	7	0.130729
61	100uM AITC + 6uM Fentanyl	AITC-Fent	8	0.145316
61	100uM AITC + 6uM Fentanyl	AITC-Fent	9	0.100948
61	100uM AITC + 6uM Fentanyl	AITC-Fent	10	0.318208
61	100uM AITC + 6uM Fentanyl	AITC-Fent	11	0.711693
61	100uM AITC + 6uM Fentanyl	AITC-Fent	12	0.726978
61	100uM AITC + 6uM Fentanyl	AITC-Fent	13	0.269242
61	100uM AITC + 6uM Fentanyl	AITC-Fent	14	0.142629
61	100uM AITC + 6uM Fentanyl	AITC-Fent	15	0.450223
61	100uM AITC + 6uM Fentanyl	AITC-Fent	16	0.39097
61	100uM AITC + 6uM Fentanyl	AITC-Fent	17	0.471265
61	100uM AITC + 6uM Fentanyl	AITC-Fent	18	1.20202
61	100uM AITC + 6uM Fentanyl	AITC-Fent	19	0.702275
61	100uM AITC + 6uM Fentanyl	AITC-Fent	20	0.143473
62	100uM AITC + 6uM Fentanyl	AITC-Fent	0	1.78124
62	100uM AITC + 6uM Fentanyl	AITC-Fent	1	1.94543
62	100uM AITC + 6uM Fentanyl	AITC-Fent	2	0.883838
62	100uM AITC + 6uM Fentanyl	AITC-Fent	3	0.812937
62	100uM AITC + 6uM Fentanyl	AITC-Fent	4	1.08993
62	100uM AITC + 6uM Fentanyl	AITC-Fent	5	0.615883
62	100uM AITC + 6uM Fentanyl	AITC-Fent	6	0.940848
62	100uM AITC + 6uM Fentanyl	AITC-Fent	7	0.303828
62	100uM AITC + 6uM Fentanyl	AITC-Fent	8	0.317348
62	100uM AITC + 6uM Fentanyl	AITC-Fent	9	0.49151
62	100uM AITC + 6uM Fentanyl	AITC-Fent	10	0.206677
62	100uM AITC + 6uM Fentanyl	AITC-Fent	11	0.18635
62	100uM AITC + 6uM Fentanyl	AITC-Fent	12	0.342928
62	100uM AITC + 6uM Fentanyl	AITC-Fent	13	0.11353
62	100uM AITC + 6uM Fentanyl	AITC-Fent	14	0.804415
62	100uM AITC + 6uM Fentanyl	AITC-Fent	15	0.693083
62	100uM AITC + 6uM Fentanyl	AITC-Fent	16	0.682757
62	100uM AITC + 6uM Fentanyl	AITC-Fent	17	0.611753
62	100uM AITC + 6uM Fentanyl	AITC-Fent	18	0.408647
62	100uM AITC + 6uM Fentanyl	AITC-Fent	19	0.393218
62	100uM AITC + 6uM Fentanyl	AITC-Fent	20	0.371557
63	6uM Fentanyl	Fent	0	0.225689
63	6uM Fentanyl	Fent	1	0.124502
63	6uM Fentanyl	Fent	2	0.108546
63	6uM Fentanyl	Fent	3	0.0551577
63	6uM Fentanyl	Fent	4	0.0474163
63	6uM Fentanyl	Fent	5	0.0923245
63	6uM Fentanyl	Fent	6	0.0782962
63	6uM Fentanyl	Fent	7	0.0469087
63	6uM Fentanyl	Fent	8	0.0393502
63	6uM Fentanyl	Fent	9	0.0522695
63	6uM Fentanyl	Fent	10	0.0583487
63	6uM Fentanyl	Fent	11	0.0377448
63	6uM Fentanyl	Fent	12	0.0610163
63	6uM Fentanyl	Fent	13	0.0391275
63	6uM Fentanyl	Fent	14	0.0382805
63	6uM Fentanyl	Fent	15	0.072591
63	6uM Fentanyl	Fent	16	0.0275145
63	6uM Fentanyl	Fent	17	0.089438
63	6uM Fentanyl	Fent	18	0.0400628
63	6uM Fentanyl	Fent	19	0.0238733
63	6uM Fentanyl	Fent	20	0.0392343
64	6uM Fentanyl	Fent	0	1.21275
64	6uM Fentanyl	Fent	1	0.0662278
64	6uM Fentanyl	Fent	2	0.0321733
64	6uM Fentanyl	Fent	3	0.0340673
64	6uM Fentanyl	Fent	4	0.0590293
64	6uM Fentanyl	Fent	5	0.052262
64	6uM Fentanyl	Fent	6	0.0584345
64	6uM Fentanyl	Fent	7	0.0378287
64	6uM Fentanyl	Fent	8	0.0402488
64	6uM Fentanyl	Fent	9	0.0470102
64	6uM Fentanyl	Fent	10	0.0419765
64	6uM Fentanyl	Fent	11	0.0274673
64	6uM Fentanyl	Fent	12	0.0262773
64	6uM Fentanyl	Fent	13	0.025633
64	6uM Fentanyl	Fent	14	0.0317967
64	6uM Fentanyl	Fent	15	0.0320202
64	6uM Fentanyl	Fent	16	0.0319367
64	6uM Fentanyl	Fent	17	0.0283638
64	6uM Fentanyl	Fent	18	0.0262977
64	6uM Fentanyl	Fent	19	0.023779
64	6uM Fentanyl	Fent	20	0.0230913
65	6uM Fentanyl	Fent	0	0.500139
65	6uM Fentanyl	Fent	1	0.171228
65	6uM Fentanyl	Fent	2	0.0948532
65	6uM Fentanyl	Fent	3	0.102107
65	6uM Fentanyl	Fent	4	0.0288417
65	6uM Fentanyl	Fent	5	0.0281063
65	6uM Fentanyl	Fent	6	0.027206
65	6uM Fentanyl	Fent	7	0.0242365
65	6uM Fentanyl	Fent	8	0.021846
65	6uM Fentanyl	Fent	9	0.0254572
65	6uM Fentanyl	Fent	10	0.0248857
65	6uM Fentanyl	Fent	11	0.0251032
65	6uM Fentanyl	Fent	12	0.0281697
65	6uM Fentanyl	Fent	13	0.0362488
65	6uM Fentanyl	Fent	14	0.0303855
65	6uM Fentanyl	Fent	15	0.0422382
65	6uM Fentanyl	Fent	16	0.0476108
65	6uM Fentanyl	Fent	17	0.0609387
65	6uM Fentanyl	Fent	18	0.376323
65	6uM Fentanyl	Fent	19	0.210372
65	6uM Fentanyl	Fent	20	0.0433482
66	6uM Fentanyl	Fent	0	1.12251
66	6uM Fentanyl	Fent	1	0.400512
66	6uM Fentanyl	Fent	2	0.0491493
66	6uM Fentanyl	Fent	3	0.0337132
66	6uM Fentanyl	Fent	4	0.0357555
66	6uM Fentanyl	Fent	5	0.0305205
66	6uM Fentanyl	Fent	6	0.172165
66	6uM Fentanyl	Fent	7	0.105032
66	6uM Fentanyl	Fent	8	0.101735
66	6uM Fentanyl	Fent	9	0.341247
66	6uM Fentanyl	Fent	10	1.47216
66	6uM Fentanyl	Fent	11	0.246537
66	6uM Fentanyl	Fent	12	0.0912537
66	6uM Fentanyl	Fent	13	0.0928032
66	6uM Fentanyl	Fent	14	0.198127
66	6uM Fentanyl	Fent	15	0.130871
66	6uM Fentanyl	Fent	16	0.079178
66	6uM Fentanyl	Fent	17	0.180048
66	6uM Fentanyl	Fent	18	0.215805
66	6uM Fentanyl	Fent	19	0.130754
66	6uM Fentanyl	Fent	20	0.110234
68	6uM Fentanyl	Fent	0	0.13571
68	6uM Fentanyl	Fent	1	0.12428
68	6uM Fentanyl	Fent	2	0.181452
68	6uM Fentanyl	Fent	3	0.1588
68	6uM Fentanyl	Fent	4	0.168577
68	6uM Fentanyl	Fent	5	0.0823797
68	6uM Fentanyl	Fent	6	0.0686905
68	6uM Fentanyl	Fent	7	0.0721545
68	6uM Fentanyl	Fent	8	0.081279
68	6uM Fentanyl	Fent	9	0.0748722
68	6uM Fentanyl	Fent	10	0.0907245
68	6uM Fentanyl	Fent	11	1.13337
68	6uM Fentanyl	Fent	12	0.41312
68	6uM Fentanyl	Fent	13	0.0904332
68	6uM Fentanyl	Fent	14	0.21411
68	6uM Fentanyl	Fent	15	0.126286
68	6uM Fentanyl	Fent	16	0.19596
68	6uM Fentanyl	Fent	17	0.378712
68	6uM Fentanyl	Fent	18	0.642548
68	6uM Fentanyl	Fent	19	0.0892238
68	6uM Fentanyl	Fent	20	0.120307
69	6uM Fentanyl	Fent	0	1.41309
69	6uM Fentanyl	Fent	1	0.482442
69	6uM Fentanyl	Fent	2	0.741622
69	6uM Fentanyl	Fent	3	0.20676
69	6uM Fentanyl	Fent	4	0.138705
69	6uM Fentanyl	Fent	5	0.093963
69	6uM Fentanyl	Fent	6	0.123267
69	6uM Fentanyl	Fent	7	0.0614915
69	6uM Fentanyl	Fent	8	0.0856588
69	6uM Fentanyl	Fent	9	0.0813273
69	6uM Fentanyl	Fent	10	0.185877
69	6uM Fentanyl	Fent	11	0.246302
69	6uM Fentanyl	Fent	12	0.203243
69	6uM Fentanyl	Fent	13	0.143898
69	6uM Fentanyl	Fent	14	0.103035
69	6uM Fentanyl	Fent	15	0.0823545
69	6uM Fentanyl	Fent	16	0.407143
69	6uM Fentanyl	Fent	17	0.245922
69	6uM Fentanyl	Fent	18	0.18997
69	6uM Fentanyl	Fent	19	0.26132
69	6uM Fentanyl	Fent	20	0.229762
70	6uM Fentanyl	Fent	0	0.299534
70	6uM Fentanyl	Fent	1	0.0409962
70	6uM Fentanyl	Fent	2	0.0261912
70	6uM Fentanyl	Fent	3	0.0274622
70	6uM Fentanyl	Fent	4	0.0266213
70	6uM Fentanyl	Fent	5	0.0423042
70	6uM Fentanyl	Fent	6	0.0311457
70	6uM Fentanyl	Fent	7	0.0286962
70	6uM Fentanyl	Fent	8	0.0276807
70	6uM Fentanyl	Fent	9	0.0235708
70	6uM Fentanyl	Fent	10	0.0698145
70	6uM Fentanyl	Fent	11	0.0501132
70	6uM Fentanyl	Fent	12	0.124168
70	6uM Fentanyl	Fent	13	0.0617672
70	6uM Fentanyl	Fent	14	0.265723
70	6uM Fentanyl	Fent	15	0.0298177
70	6uM Fentanyl	Fent	16	0.0800098
70	6uM Fentanyl	Fent	17	0.165265
70	6uM Fentanyl	Fent	18	0.0314983
70	6uM Fentanyl	Fent	19	0.030351
70	6uM Fentanyl	Fent	20	0.0301937
71	6uM Fentanyl	Fent	0	0.742402
71	6uM Fentanyl	Fent	1	0.256535
71	6uM Fentanyl	Fent	2	0.525018
71	6uM Fentanyl	Fent	3	0.357297
71	6uM Fentanyl	Fent	4	0.176865
71	6uM Fentanyl	Fent	5	0.121705
71	6uM Fentanyl	Fent	6	1.7157
71	6uM Fentanyl	Fent	7	0.214218
71	6uM Fentanyl	Fent	8	0.117064
71	6uM Fentanyl	Fent	9	0.114601
71	6uM Fentanyl	Fent	10	0.209738
71	6uM Fentanyl	Fent	11	0.187605
71	6uM Fentanyl	Fent	12	0.23926
71	6uM Fentanyl	Fent	13	0.102808
71	6uM Fentanyl	Fent	14	0.114256
71	6uM Fentanyl	Fent	15	0.0910068
71	6uM Fentanyl	Fent	16	0.0800127
71	6uM Fentanyl	Fent	17	0.0464715
71	6uM Fentanyl	Fent	18	0.197435
71	6uM Fentanyl	Fent	19	0.245668
71	6uM Fentanyl	Fent	20	0.139952
72	6uM Fentanyl	Fent	0	0.241015
72	6uM Fentanyl	Fent	1	0.312218
72	6uM Fentanyl	Fent	2	0.118285
72	6uM Fentanyl	Fent	3	0.110482
72	6uM Fentanyl	Fent	4	0.0904023
72	6uM Fentanyl	Fent	5	0.109385
72	6uM Fentanyl	Fent	6	0.074681
72	6uM Fentanyl	Fent	7	0.0857295
72	6uM Fentanyl	Fent	8	0.11146
72	6uM Fentanyl	Fent	9	0.152276
72	6uM Fentanyl	Fent	10	0.1676
72	6uM Fentanyl	Fent	11	0.165644
72	6uM Fentanyl	Fent	12	0.226878
72	6uM Fentanyl	Fent	13	0.233158
72	6uM Fentanyl	Fent	14	0.120402
72	6uM Fentanyl	Fent	15	0.0558063
72	6uM Fentanyl	Fent	16	0.0814403
72	6uM Fentanyl	Fent	17	0.0538915
72	6uM Fentanyl	Fent	18	0.054646
72	6uM Fentanyl	Fent	19	0.0495057
72	6uM Fentanyl	Fent	20	0.0505433

## Sheet: Figure6c
Animal #	Group	Grp	Condition	Swimming velocity	Angular velocity
2	Control (embryo water)	Ctrl	Baseline	0.708209	1330.45
3	Control (embryo water)	Ctrl	Baseline	0.826395	1583.54
4	Control (embryo water)	Ctrl	Baseline	1.12127	1219.84
5	Control (embryo water)	Ctrl	Baseline	1.68648	1148.27
6	Control (embryo water)	Ctrl	Baseline	0.215523	1735.83
7	Control (embryo water)	Ctrl	Baseline	0.140006	1676.06
8	Control (embryo water)	Ctrl	Baseline	1.64741	1199.9
9	Control (embryo water)	Ctrl	Baseline	0.211925	1823.39
10	Control (embryo water)	Ctrl	Baseline	0.278348	1900.98
11	Control (embryo water)	Ctrl	Baseline	1.02338	1315.19
12	Control (embryo water)	Ctrl	Baseline	1.43722	1087.05
13	Control (embryo water)	Ctrl	Baseline	0.634015	1479.52
14	Control (embryo water)	Ctrl	Baseline	1.05585	1293.14
15	Control (embryo water)	Ctrl	Baseline	1.46308	1207.34
17	Control (embryo water)	Ctrl	Baseline	1.50321	1362.36
18	Control (embryo water)	Ctrl	Baseline	0.728206	1823.48
19	Control (embryo water)	Ctrl	Baseline	1.33166	1181.08
20	Control (embryo water)	Ctrl	Baseline	0.302328	2121.08
21	Control (embryo water)	Ctrl	Baseline	0.709884	1296.72
22	Control (embryo water)	Ctrl	Baseline	0.491139	1617.06
23	Control (embryo water)	Ctrl	Baseline	0.133544	1723.9
24	Control (embryo water)	Ctrl	Baseline	1.1922	1271.46
25	Control (embryo water)	Ctrl	Baseline	1.02236	1330.99
26	Control (embryo water)	Ctrl	Baseline	0.365193	1742.61
27	Control (embryo water)	Ctrl	Baseline	0.693882	1188.67
2	Control (embryo water)	Ctrl	Treatment	0.753012	1737.83
3	Control (embryo water)	Ctrl	Treatment	0.301979	1472.53
4	Control (embryo water)	Ctrl	Treatment	0.145019	1492.02
5	Control (embryo water)	Ctrl	Treatment	2.2462	896.433
6	Control (embryo water)	Ctrl	Treatment	0.0727158	2126.26
7	Control (embryo water)	Ctrl	Treatment	0.207565	1827.95
8	Control (embryo water)	Ctrl	Treatment	0.269899	1562.62
9	Control (embryo water)	Ctrl	Treatment	0.160479	2209.07
10	Control (embryo water)	Ctrl	Treatment	0.268691	1711.93
11	Control (embryo water)	Ctrl	Treatment	0.705951	1530.62
12	Control (embryo water)	Ctrl	Treatment	0.685782	1425.82
13	Control (embryo water)	Ctrl	Treatment	1.61225	889.221
14	Control (embryo water)	Ctrl	Treatment	0.540043	1615.29
15	Control (embryo water)	Ctrl	Treatment	0.412417	1410.99
17	Control (embryo water)	Ctrl	Treatment	0.0750097	1948.26
18	Control (embryo water)	Ctrl	Treatment	0.0865498	2006.49
19	Control (embryo water)	Ctrl	Treatment	0.334591	1640.12
20	Control (embryo water)	Ctrl	Treatment	0.115064	2267.18
21	Control (embryo water)	Ctrl	Treatment	2.15249	942.835
22	Control (embryo water)	Ctrl	Treatment	0.941183	1295.45
23	Control (embryo water)	Ctrl	Treatment	0.222555	1436.12
24	Control (embryo water)	Ctrl	Treatment	0.423952	1486.37
25	Control (embryo water)	Ctrl	Treatment	1.14189	1327.87
26	Control (embryo water)	Ctrl	Treatment	0.469713	1462.62
27	Control (embryo water)	Ctrl	Treatment	1.7092	1136.72
28	100uM AITC	AITC	Baseline	0.1709	1992.15
29	100uM AITC	AITC	Baseline	0.620087	1627.75
30	100uM AITC	AITC	Baseline	0.758217	1585.82
31	100uM AITC	AITC	Baseline	0.853705	1706.68
32	100uM AITC	AITC	Baseline	1.01979	1060.61
33	100uM AITC	AITC	Baseline	0.963851	1045.14
34	100uM AITC	AITC	Baseline	1.14352	1464.64
35	100uM AITC	AITC	Baseline	0.177563	1761.73
36	100uM AITC	AITC	Baseline	0.420484	1617.51
37	100uM AITC	AITC	Baseline	1.77425	1427.23
38	100uM AITC	AITC	Baseline	0.314107	1365.56
39	100uM AITC	AITC	Baseline	1.09576	1630.15
40	100uM AITC	AITC	Baseline	0.306824	1779.12
41	100uM AITC	AITC	Baseline	1.33935	1359.88
42	100uM AITC	AITC	Baseline	1.87394	1157.75
43	100uM AITC	AITC	Baseline	0.738959	1360.56
44	100uM AITC	AITC	Baseline	0.104433	2006.29
45	100uM AITC	AITC	Baseline	0.750491	1280.46
46	100uM AITC	AITC	Baseline	0.660101	1331.37
47	100uM AITC	AITC	Baseline	0.706443	1578.8
48	100uM AITC	AITC	Baseline	0.602975	1407.72
49	100uM AITC	AITC	Baseline	1.11648	1693.58
50	100uM AITC	AITC	Baseline	1.76882	1246.47
51	100uM AITC	AITC	Baseline	0.921725	1338.99
52	100uM AITC	AITC	Baseline	0.477555	1341.48
53	100uM AITC	AITC	Baseline	0.123488	1763.92
28	100uM AITC	AITC	Treatment	1.96853	1041.32
29	100uM AITC	AITC	Treatment	2.43793	1137.75
30	100uM AITC	AITC	Treatment	2.00766	1338.44
31	100uM AITC	AITC	Treatment	0.201489	1445.46
32	100uM AITC	AITC	Treatment	1.0583	1290.27
33	100uM AITC	AITC	Treatment	2.45484	953.907
34	100uM AITC	AITC	Treatment	3.14184	1056.48
35	100uM AITC	AITC	Treatment	2.10735	1068.62
36	100uM AITC	AITC	Treatment	2.33539	837.259
37	100uM AITC	AITC	Treatment	1.70694	1537.85
38	100uM AITC	AITC	Treatment	0.792801	1668.07
39	100uM AITC	AITC	Treatment	2.07325	1290.72
40	100uM AITC	AITC	Treatment	2.61076	1002.43
41	100uM AITC	AITC	Treatment	1.53322	1357.09
42	100uM AITC	AITC	Treatment	3.0525	1300.39
43	100uM AITC	AITC	Treatment	2.27354	1217.74
44	100uM AITC	AITC	Treatment	2.989	902.745
45	100uM AITC	AITC	Treatment	2.29993	1037.71
46	100uM AITC	AITC	Treatment	0.674068	1748.08
47	100uM AITC	AITC	Treatment	2.15724	1004.69
48	100uM AITC	AITC	Treatment	1.72244	1301.19
49	100uM AITC	AITC	Treatment	2.16125	1187.97
50	100uM AITC	AITC	Treatment	1.0863	1674.78
51	100uM AITC	AITC	Treatment	1.96163	1376.32
52	100uM AITC	AITC	Treatment	1.58207	1166.1
53	100uM AITC	AITC	Treatment	2.38453	1407.61
54	100uM AITC + 6uM Fentanyl	Fent-AITC	Baseline	1.29817	1251.45
55	100uM AITC + 6uM Fentanyl	Fent-AITC	Baseline	1.58246	1263.2
57	100uM AITC + 6uM Fentanyl	Fent-AITC	Baseline	1.01607	1419
58	100uM AITC + 6uM Fentanyl	Fent-AITC	Baseline	0.933464	1512.1
59	100uM AITC + 6uM Fentanyl	Fent-AITC	Baseline	1.25799	1361.08
60	100uM AITC + 6uM Fentanyl	Fent-AITC	Baseline	0.14722	1989.91
61	100uM AITC + 6uM Fentanyl	Fent-AITC	Baseline	0.59129	1859.24
62	100uM AITC + 6uM Fentanyl	Fent-AITC	Baseline	0.409131	1606.79
63	100uM AITC + 6uM Fentanyl	Fent-AITC	Baseline	1.83684	1495.09
64	100uM AITC + 6uM Fentanyl	Fent-AITC	Baseline	0.760377	1458.69
65	100uM AITC + 6uM Fentanyl	Fent-AITC	Baseline	0.297786	1877.13
66	100uM AITC + 6uM Fentanyl	Fent-AITC	Baseline	1.10472	1197.32
67	100uM AITC + 6uM Fentanyl	Fent-AITC	Baseline	0.827772	1491.72
68	100uM AITC + 6uM Fentanyl	Fent-AITC	Baseline	1.73565	1412.1
69	100uM AITC + 6uM Fentanyl	Fent-AITC	Baseline	1.57233	955.589
70	100uM AITC + 6uM Fentanyl	Fent-AITC	Baseline	1.78124	1120.29
54	100uM AITC + 6uM Fentanyl	Fent-AITC	Treatment	0.769498	1605.74
55	100uM AITC + 6uM Fentanyl	Fent-AITC	Treatment	0.733281	1671.94
57	100uM AITC + 6uM Fentanyl	Fent-AITC	Treatment	0.497544	1539.35
58	100uM AITC + 6uM Fentanyl	Fent-AITC	Treatment	0.05763	1909.71
59	100uM AITC + 6uM Fentanyl	Fent-AITC	Treatment	0.754736	1514.69
60	100uM AITC + 6uM Fentanyl	Fent-AITC	Treatment	0.67323	1591.69
61	100uM AITC + 6uM Fentanyl	Fent-AITC	Treatment	0.155015	1557.86
62	100uM AITC + 6uM Fentanyl	Fent-AITC	Treatment	0.337572	2111.9
63	100uM AITC + 6uM Fentanyl	Fent-AITC	Treatment	0.943488	1528.99
64	100uM AITC + 6uM Fentanyl	Fent-AITC	Treatment	0.705046	1763.91
65	100uM AITC + 6uM Fentanyl	Fent-AITC	Treatment	1.32792	1411.38
66	100uM AITC + 6uM Fentanyl	Fent-AITC	Treatment	0.947786	1302.83
67	100uM AITC + 6uM Fentanyl	Fent-AITC	Treatment	2.55264	984.614
68	100uM AITC + 6uM Fentanyl	Fent-AITC	Treatment	1.00255	1576.12
69	100uM AITC + 6uM Fentanyl	Fent-AITC	Treatment	0.412712	1519.78
70	100uM AITC + 6uM Fentanyl	Fent-AITC	Treatment	1.21407	1458.01
71	6uM Fentanyl	Fent	Baseline	0.225689	1829.14
72	6uM Fentanyl	Fent	Baseline	1.21275	1081.04
73	6uM Fentanyl	Fent	Baseline	0.500139	1601.78
74	6uM Fentanyl	Fent	Baseline	1.12251	1285.14
76	6uM Fentanyl	Fent	Baseline	0.13571	2139.06
77	6uM Fentanyl	Fent	Baseline	1.41309	1098.54
78	6uM Fentanyl	Fent	Baseline	0.299534	1839.95
79	6uM Fentanyl	Fent	Baseline	0.742402	1612.89
80	6uM Fentanyl	Fent	Baseline	0.241015	1801.83
71	6uM Fentanyl	Fent	Treatment	0.0960687	2295.25
72	6uM Fentanyl	Fent	Treatment	0.0441562	2281.98
73	6uM Fentanyl	Fent	Treatment	0.12273	1905.03
74	6uM Fentanyl	Fent	Treatment	0.161125	2071.12
76	6uM Fentanyl	Fent	Treatment	0.154844	2145.7
77	6uM Fentanyl	Fent	Treatment	0.476941	1984.28
78	6uM Fentanyl	Fent	Treatment	0.0315498	2292.89
79	6uM Fentanyl	Fent	Treatment	0.379617	1634.84
80	6uM Fentanyl	Fent	Treatment	0.180329	1802.4
93	20uM Naloxone + 100uM AITC + 6uM Fentanyl	Nal-20AF	Baseline	0.351754	1092.95
94	20uM Naloxone + 100uM AITC + 6uM Fentanyl	Nal-20AF	Baseline	1.20527	888.529
95	20uM Naloxone + 100uM AITC + 6uM Fentanyl	Nal-20AF	Baseline	0.929579	1324.9
96	20uM Naloxone + 100uM AITC + 6uM Fentanyl	Nal-20AF	Baseline	0.307177	1778.78
97	20uM Naloxone + 100uM AITC + 6uM Fentanyl	Nal-20AF	Baseline	0.848899	1268.91
98	20uM Naloxone + 100uM AITC + 6uM Fentanyl	Nal-20AF	Baseline	1.03406	1324.56
99	20uM Naloxone + 100uM AITC + 6uM Fentanyl	Nal-20AF	Baseline	0.768229	1357.13
100	20uM Naloxone + 100uM AITC + 6uM Fentanyl	Nal-20AF	Baseline	0.346236	1618.98
101	20uM Naloxone + 100uM AITC + 6uM Fentanyl	Nal-20AF	Baseline	0.152467	1693.68
102	20uM Naloxone + 100uM AITC + 6uM Fentanyl	Nal-20AF	Baseline	1.08743	1225.35
103	20uM Naloxone + 100uM AITC + 6uM Fentanyl	Nal-20AF	Baseline	0.236206	1781.06
104	20uM Naloxone + 100uM AITC + 6uM Fentanyl	Nal-20AF	Baseline	0.772167	1302.53
93	20uM Naloxone + 100uM AITC + 6uM Fentanyl	Nal-20AF	Treatment	2.72688	936.697
94	20uM Naloxone + 100uM AITC + 6uM Fentanyl	Nal-20AF	Treatment	1.76999	968.723
95	20uM Naloxone + 100uM AITC + 6uM Fentanyl	Nal-20AF	Treatment	2.9835	1073.19
96	20uM Naloxone + 100uM AITC + 6uM Fentanyl	Nal-20AF	Treatment	1.29772	1449.35
97	20uM Naloxone + 100uM AITC + 6uM Fentanyl	Nal-20AF	Treatment	0.671383	1568.17
98	20uM Naloxone + 100uM AITC + 6uM Fentanyl	Nal-20AF	Treatment	1.14966	995.172
99	20uM Naloxone + 100uM AITC + 6uM Fentanyl	Nal-20AF	Treatment	2.09228	1290.3
100	20uM Naloxone + 100uM AITC + 6uM Fentanyl	Nal-20AF	Treatment	0.901713	1141.62
101	20uM Naloxone + 100uM AITC + 6uM Fentanyl	Nal-20AF	Treatment	2.44722	963.255
102	20uM Naloxone + 100uM AITC + 6uM Fentanyl	Nal-20AF	Treatment	1.88617	906.221
103	20uM Naloxone + 100uM AITC + 6uM Fentanyl	Nal-20AF	Treatment	2.14931	978.466
104	20uM Naloxone + 100uM AITC + 6uM Fentanyl	Nal-20AF	Treatment	1.21422	1368.69
105	50uM Naloxone +100uM AITC + 6uM Fentanyl	Nal-50AF	Baseline	0.100534	1985.27
106	50uM Naloxone +100uM AITC + 6uM Fentanyl	Nal-50AF	Baseline	0.986746	1424.76
107	50uM Naloxone +100uM AITC + 6uM Fentanyl	Nal-50AF	Baseline	0.270919	1606.4
108	50uM Naloxone +100uM AITC + 6uM Fentanyl	Nal-50AF	Baseline	0.25535	1796.98
109	50uM Naloxone +100uM AITC + 6uM Fentanyl	Nal-50AF	Baseline	0.418366	1614.26
111	50uM Naloxone +100uM AITC + 6uM Fentanyl	Nal-50AF	Baseline	1.21013	844.331
112	50uM Naloxone +100uM AITC + 6uM Fentanyl	Nal-50AF	Baseline	1.62476	771.84
114	50uM Naloxone +100uM AITC + 6uM Fentanyl	Nal-50AF	Baseline	1.11865	1019.16
117	50uM Naloxone +100uM AITC + 6uM Fentanyl	Nal-50AF	Baseline	0.762223	1112.27
118	50uM Naloxone +100uM AITC + 6uM Fentanyl	Nal-50AF	Baseline	0.282769	1903.19
119	50uM Naloxone +100uM AITC + 6uM Fentanyl	Nal-50AF	Baseline	0.935931	1233.51
120	50uM Naloxone +100uM AITC + 6uM Fentanyl	Nal-50AF	Baseline	1.56976	1025.55
121	50uM Naloxone +100uM AITC + 6uM Fentanyl	Nal-50AF	Baseline	0.110568	2180.68
122	50uM Naloxone +100uM AITC + 6uM Fentanyl	Nal-50AF	Baseline	0.209312	2027.21
124	50uM Naloxone +100uM AITC + 6uM Fentanyl	Nal-50AF	Baseline	1.79854	1138.71
125	50uM Naloxone +100uM AITC + 6uM Fentanyl	Nal-50AF	Baseline	1.55639	1051.99
126	50uM Naloxone +100uM AITC + 6uM Fentanyl	Nal-50AF	Baseline	0.999374	1291.12
105	50uM Naloxone +100uM AITC + 6uM Fentanyl	Nal-50AF	Treatment	3.27158	922.558
106	50uM Naloxone +100uM AITC + 6uM Fentanyl	Nal-50AF	Treatment	0.829002	1495.84
107	50uM Naloxone +100uM AITC + 6uM Fentanyl	Nal-50AF	Treatment	2.05112	1205.06
108	50uM Naloxone +100uM AITC + 6uM Fentanyl	Nal-50AF	Treatment	1.55004	1029.01
109	50uM Naloxone +100uM AITC + 6uM Fentanyl	Nal-50AF	Treatment	2.81667	1099.24
111	50uM Naloxone +100uM AITC + 6uM Fentanyl	Nal-50AF	Treatment	2.21964	1193.43
112	50uM Naloxone +100uM AITC + 6uM Fentanyl	Nal-50AF	Treatment	2.01217	772.156
114	50uM Naloxone +100uM AITC + 6uM Fentanyl	Nal-50AF	Treatment	1.99513	1181.48
117	50uM Naloxone +100uM AITC + 6uM Fentanyl	Nal-50AF	Treatment	2.68124	1086.43
118	50uM Naloxone +100uM AITC + 6uM Fentanyl	Nal-50AF	Treatment	1.78247	1619.11
119	50uM Naloxone +100uM AITC + 6uM Fentanyl	Nal-50AF	Treatment	2.65948	1166.21
120	50uM Naloxone +100uM AITC + 6uM Fentanyl	Nal-50AF	Treatment	2.66943	1247.96
121	50uM Naloxone +100uM AITC + 6uM Fentanyl	Nal-50AF	Treatment	2.09804	1121.91
122	50uM Naloxone +100uM AITC + 6uM Fentanyl	Nal-50AF	Treatment	1.38599	1716.15
124	50uM Naloxone +100uM AITC + 6uM Fentanyl	Nal-50AF	Treatment	3.36192	1087.98
125	50uM Naloxone +100uM AITC + 6uM Fentanyl	Nal-50AF	Treatment	2.84061	1172.08
126	50uM Naloxone +100uM AITC + 6uM Fentanyl	Nal-50AF	Treatment	2.97963	1234.9
81	20uM CTAP + 100uM AITC + 6uM Fentanyl	CTAP-AF	Baseline	0.139939	1739.08
83	20uM CTAP + 100uM AITC + 6uM Fentanyl	CTAP-AF	Baseline	0.223753	1720.5
84	20uM CTAP + 100uM AITC + 6uM Fentanyl	CTAP-AF	Baseline	1.31648	1084.44
85	20uM CTAP + 100uM AITC + 6uM Fentanyl	CTAP-AF	Baseline	0.783348	1504.9
86	20uM CTAP + 100uM AITC + 6uM Fentanyl	CTAP-AF	Baseline	0.267723	1649.15
87	20uM CTAP + 100uM AITC + 6uM Fentanyl	CTAP-AF	Baseline	0.813115	1069.23
88	20uM CTAP + 100uM AITC + 6uM Fentanyl	CTAP-AF	Baseline	0.386757	1547.43
89	20uM CTAP + 100uM AITC + 6uM Fentanyl	CTAP-AF	Baseline	1.65805	916.637
90	20uM CTAP + 100uM AITC + 6uM Fentanyl	CTAP-AF	Baseline	1.16542	1240.49
91	20uM CTAP + 100uM AITC + 6uM Fentanyl	CTAP-AF	Baseline	0.973884	1102.62
92	20uM CTAP + 100uM AITC + 6uM Fentanyl	CTAP-AF	Baseline	0.261084	1659.17
81	20uM CTAP + 100uM AITC + 6uM Fentanyl	CTAP-AF	Treatment	0.0947353	2172.21
83	20uM CTAP + 100uM AITC + 6uM Fentanyl	CTAP-AF	Treatment	1.43517	1555.05
84	20uM CTAP + 100uM AITC + 6uM Fentanyl	CTAP-AF	Treatment	0.415221	1772.5
85	20uM CTAP + 100uM AITC + 6uM Fentanyl	CTAP-AF	Treatment	0.710627	1549.5
86	20uM CTAP + 100uM AITC + 6uM Fentanyl	CTAP-AF	Treatment	2.66276	993.827
87	20uM CTAP + 100uM AITC + 6uM Fentanyl	CTAP-AF	Treatment	1.22902	1180.84
88	20uM CTAP + 100uM AITC + 6uM Fentanyl	CTAP-AF	Treatment	1.33613	1386.22
89	20uM CTAP + 100uM AITC + 6uM Fentanyl	CTAP-AF	Treatment	2.27282	1222.86
90	20uM CTAP + 100uM AITC + 6uM Fentanyl	CTAP-AF	Treatment	0.811483	1654.67
91	20uM CTAP + 100uM AITC + 6uM Fentanyl	CTAP-AF	Treatment	1.84128	1157.96
92	20uM CTAP + 100uM AITC + 6uM Fentanyl	CTAP-AF	Treatment	1.46775	1134.23
