# Supplementary material for: Respiratory depression and analgesia by opioid drugs in freely behaving larval zebrafish
Source: eLife. 2021 Mar 15;10:e63407. doi: 10.7554/eLife.63407 (PMC8060028; doi:10.7554/eLife.63407)
Supplement: Figure 7—source data 1. [file elife-63407-fig7-data1.xlsx]

## Sheet: Figure7A
Animal #	Group		Condition	Swimming velocity	Angular velocity
1	Control (embryo water)		Baseline	0.608293	719.143
2	Control (embryo water)		Baseline	0.580392	748.333
3	Control (embryo water)		Baseline	1.83309	552.365
4	Control (embryo water)		Baseline	1.44502	553.491
5	Control (embryo water)		Baseline	0.800272	1304.35
6	Control (embryo water)		Baseline	0.556322	1572.19
7	Control (embryo water)		Baseline	1.44301	1198.8
8	Control (embryo water)		Baseline	0.215534	2027.91
9	Control (embryo water)		Baseline	0.301139	2095.28
10	Control (embryo water)		Baseline	1.35871	1194.14
11	Control (embryo water)		Baseline	0.396192	1662.33
12	Control (embryo water)		Baseline	0.978432	1262.2
13	Control (embryo water)		Baseline	0.438662	1366.39
14	Control (embryo water)		Baseline	0.427704	1655.66
15	Control (embryo water)		Baseline	0.860558	1447.76
16	Control (embryo water)		Baseline	0.786683	1587.58
1	Control (embryo water)		Treatment	0.207847	788.918
2	Control (embryo water)		Treatment	0.345636	655.672
3	Control (embryo water)		Treatment	1.58541	648.922
4	Control (embryo water)		Treatment	1.58314	488.476
5	Control (embryo water)		Treatment	0.451076	1465.63
6	Control (embryo water)		Treatment	0.382194	1901.76
7	Control (embryo water)		Treatment	0.589606	1458.6
8	Control (embryo water)		Treatment	0.234951	2048.07
9	Control (embryo water)		Treatment	0.386881	2041.21
10	Control (embryo water)		Treatment	1.07684	1220.44
11	Control (embryo water)		Treatment	0.357317	1504.05
12	Control (embryo water)		Treatment	0.501086	1405.36
13	Control (embryo water)		Treatment	0.664636	1119.98
14	Control (embryo water)		Treatment	0.268374	1431.62
15	Control (embryo water)		Treatment	0.124236	1890.63
16	Control (embryo water)		Treatment	2.02755	1238.56
17	1% DMSO (vehicle)		Baseline	0.864791	1542.86
18	1% DMSO (vehicle)		Baseline	0.698057	1220.65
19	1% DMSO (vehicle)		Baseline	0.271719	1627.74
21	1% DMSO (vehicle)		Baseline	0.236852	1282.7
22	1% DMSO (vehicle)		Baseline	0.603458	1467.11
23	1% DMSO (vehicle)		Baseline	0.356271	1814.3
24	1% DMSO (vehicle)		Baseline	1.10842	1436.55
25	1% DMSO (vehicle)		Baseline	1.27739	1196.14
26	1% DMSO (vehicle)		Baseline	1.61017	1444.32
17	1% DMSO (vehicle)		Treatment	0.520924	1538.7
18	1% DMSO (vehicle)		Treatment	1.25092	1299.3
19	1% DMSO (vehicle)		Treatment	0.373372	1610.95
21	1% DMSO (vehicle)		Treatment	0.987671	1151.9
22	1% DMSO (vehicle)		Treatment	0.186046	1667.63
23	1% DMSO (vehicle)		Treatment	0.558548	1198.65
24	1% DMSO (vehicle)		Treatment	0.490609	1424.33
25	1% DMSO (vehicle)		Treatment	0.427437	1636.14
26	1% DMSO (vehicle)		Treatment	0.914319	1436.4
27	0.05% Formalin		Baseline	1.39155	1086.23
28	0.05% Formalin		Baseline	0.481496	1684.8
29	0.05% Formalin		Baseline	0.580069	1565.23
30	0.05% Formalin		Baseline	0.337465	1889.77
31	0.05% Formalin		Baseline	0.218009	1916.74
32	0.05% Formalin		Baseline	0.570824	1394.62
33	0.05% Formalin		Baseline	0.236965	1900.91
34	0.05% Formalin		Baseline	0.872041	1323.62
35	0.05% Formalin		Baseline	0.701028	1806.5
36	0.05% Formalin		Baseline	1.01453	1312.87
27	0.05% Formalin		Treatment	3.37462	841.461
28	0.05% Formalin		Treatment	2.45545	898.243
29	0.05% Formalin		Treatment	0.998291	1438.1
30	0.05% Formalin		Treatment	2.64399	980.621
31	0.05% Formalin		Treatment	2.10496	999.818
32	0.05% Formalin		Treatment	1.65541	1098.69
33	0.05% Formalin		Treatment	1.98005	1178.31
34	0.05% Formalin		Treatment	2.10458	1035.02
35	0.05% Formalin		Treatment	1.74596	1081.66
36	0.05% Formalin		Treatment	3.27166	743.28
37	60uM lidocaine (in 1%DMSO) + 0.05% formalin		Baseline	1.70991	569.304
38	60uM lidocaine (in 1%DMSO) + 0.05% formalin		Baseline	0.824889	709.024
39	60uM lidocaine (in 1%DMSO) + 0.05% formalin		Baseline	0.46802	839.064
40	60uM lidocaine (in 1%DMSO) + 0.05% formalin		Baseline	0.396952	725.457
42	60uM lidocaine (in 1%DMSO) + 0.05% formalin		Baseline	0.156897	777.39
43	60uM lidocaine (in 1%DMSO) + 0.05% formalin		Baseline	0.715723	582.178
44	60uM lidocaine (in 1%DMSO) + 0.05% formalin		Baseline	1.59329	465.786
46	60uM lidocaine (in 1%DMSO) + 0.05% formalin		Baseline	1.20999	522.784
47	60uM lidocaine (in 1%DMSO) + 0.05% formalin		Baseline	0.578063	1825.89
49	60uM lidocaine (in 1%DMSO) + 0.05% formalin		Baseline	1.21116	1235.55
50	60uM lidocaine (in 1%DMSO) + 0.05% formalin		Baseline	1.51965	1331.11
51	60uM lidocaine (in 1%DMSO) + 0.05% formalin		Baseline	1.12325	1626.5
52	60uM lidocaine (in 1%DMSO) + 0.05% formalin		Baseline	1.52541	1314.82
53	60uM lidocaine (in 1%DMSO) + 0.05% formalin		Baseline	1.19982	1680.34
54	60uM lidocaine (in 1%DMSO) + 0.05% formalin		Baseline	1.31748	1182.04
55	60uM lidocaine (in 1%DMSO) + 0.05% formalin		Baseline	0.975988	1599.48
56	60uM lidocaine (in 1%DMSO) + 0.05% formalin		Baseline	0.152095	2112.94
59	60uM lidocaine (in 1%DMSO) + 0.05% formalin		Baseline	0.326738	2057.23
60	60uM lidocaine (in 1%DMSO) + 0.05% formalin		Baseline	0.135363	1743.37
37	60uM lidocaine (in 1%DMSO) + 0.05% formalin		Treatment	1.43191	492.541
38	60uM lidocaine (in 1%DMSO) + 0.05% formalin		Treatment	0.509615	632.525
39	60uM lidocaine (in 1%DMSO) + 0.05% formalin		Treatment	1.26121	571.802
40	60uM lidocaine (in 1%DMSO) + 0.05% formalin		Treatment	1.34924	549.876
42	60uM lidocaine (in 1%DMSO) + 0.05% formalin		Treatment	1.5332	545.238
43	60uM lidocaine (in 1%DMSO) + 0.05% formalin		Treatment	0.731403	627.046
44	60uM lidocaine (in 1%DMSO) + 0.05% formalin		Treatment	0.795114	655.93
46	60uM lidocaine (in 1%DMSO) + 0.05% formalin		Treatment	1.27699	587.768
47	60uM lidocaine (in 1%DMSO) + 0.05% formalin		Treatment	0.364602	1815.08
49	60uM lidocaine (in 1%DMSO) + 0.05% formalin		Treatment	0.692884	1539
50	60uM lidocaine (in 1%DMSO) + 0.05% formalin		Treatment	0.19016	2028.72
51	60uM lidocaine (in 1%DMSO) + 0.05% formalin		Treatment	2.00281	1228.1
52	60uM lidocaine (in 1%DMSO) + 0.05% formalin		Treatment	2.58777	1177.94
53	60uM lidocaine (in 1%DMSO) + 0.05% formalin		Treatment	1.7915	1417.38
54	60uM lidocaine (in 1%DMSO) + 0.05% formalin		Treatment	2.28533	1068.75
55	60uM lidocaine (in 1%DMSO) + 0.05% formalin		Treatment	2.26628	1095.22
56	60uM lidocaine (in 1%DMSO) + 0.05% formalin		Treatment	0.682632	1200.37
59	60uM lidocaine (in 1%DMSO) + 0.05% formalin		Treatment	0.577048	1416.76
60	60uM lidocaine (in 1%DMSO) + 0.05% formalin		Treatment	2.44837	1101.01
61	60uM lidocaine (in 1%DMSO)		Baseline	0.494651	740.492
62	60uM lidocaine (in 1%DMSO)		Baseline	0.543957	689.081
63	60uM lidocaine (in 1%DMSO)		Baseline	0.580454	599.77
64	60uM lidocaine (in 1%DMSO)		Baseline	0.951879	680.588
65	60uM lidocaine (in 1%DMSO)		Baseline	1.33335	577.224
66	60uM lidocaine (in 1%DMSO)		Baseline	0.265998	852.659
67	60uM lidocaine (in 1%DMSO)		Baseline	0.949508	624.471
68	60uM lidocaine (in 1%DMSO)		Baseline	0.693832	939.02
70	60uM lidocaine (in 1%DMSO)		Baseline	1.40243	570.809
61	60uM lidocaine (in 1%DMSO)		Treatment	0.731753	641.464
62	60uM lidocaine (in 1%DMSO)		Treatment	0.263919	570.861
63	60uM lidocaine (in 1%DMSO)		Treatment	1.16063	644.418
64	60uM lidocaine (in 1%DMSO)		Treatment	0.199274	817.8
65	60uM lidocaine (in 1%DMSO)		Treatment	1.60062	576.418
66	60uM lidocaine (in 1%DMSO)		Treatment	0.919409	598.55
67	60uM lidocaine (in 1%DMSO)		Treatment	0.902673	605.93
68	60uM lidocaine (in 1%DMSO)		Treatment	1.32428	536.355
70	60uM lidocaine (in 1%DMSO)		Treatment	0.782246	578.394

## Sheet: Figure7B
Animal #	Group		Condition	Swimming velocity	Angular velocity
1	Control (embryo water)		Baseline	0.909727	1241.38
2	Control (embryo water)		Baseline	0.990333	1162.39
3	Control (embryo water)		Baseline	0.624608	1479.85
4	Control (embryo water)		Baseline	0.776925	1493.63
5	Control (embryo water)		Baseline	0.69167	1772.24
6	Control (embryo water)		Baseline	0.668039	1441.01
7	Control (embryo water)		Baseline	0.441728	1813.99
8	Control (embryo water)		Baseline	0.466874	1749.99
9	Control (embryo water)		Baseline	0.508897	1581.35
10	Control (embryo water)		Baseline	1.04694	1372.7
11	Control (embryo water)		Baseline	0.327998	1936.23
12	Control (embryo water)		Baseline	0.316737	2057.7
13	Control (embryo water)		Baseline	0.217633	1676.84
15	Control (embryo water)		Baseline	1.00951	1084.26
16	Control (embryo water)		Baseline	0.324946	1548.13
18	Control (embryo water)		Baseline	0.136707	1836.04
19	Control (embryo water)		Baseline	1.34166	1305.82
20	Control (embryo water)		Baseline	0.532812	1897
21	Control (embryo water)		Baseline	0.798886	1613.41
22	Control (embryo water)		Baseline	0.834746	1554
23	Control (embryo water)		Baseline	0.287132	1733.63
24	Control (embryo water)		Baseline	0.557639	1747.34
1	Control (embryo water)		Treatment	0.100995	1834.22
2	Control (embryo water)		Treatment	0.542317	1301.35
3	Control (embryo water)		Treatment	0.623721	1366.5
4	Control (embryo water)		Treatment	2.23899	815.35
5	Control (embryo water)		Treatment	0.163558	1760.56
6	Control (embryo water)		Treatment	0.431113	1401.06
7	Control (embryo water)		Treatment	1.39271	1305.2
8	Control (embryo water)		Treatment	0.161551	1621.54
9	Control (embryo water)		Treatment	0.794378	1308.09
10	Control (embryo water)		Treatment	0.396138	1781.52
11	Control (embryo water)		Treatment	0.101059	1842.59
12	Control (embryo water)		Treatment	0.149671	1779.28
13	Control (embryo water)		Treatment	0.202058	1775.46
15	Control (embryo water)		Treatment	0.124496	1937.08
16	Control (embryo water)		Treatment	0.136955	1836.67
18	Control (embryo water)		Treatment	1.29263	1254.03
19	Control (embryo water)		Treatment	0.191012	2084.45
20	Control (embryo water)		Treatment	1.29414	1143.11
21	Control (embryo water)		Treatment	0.702771	1421.4
22	Control (embryo water)		Treatment	0.131167	1960.71
23	Control (embryo water)		Treatment	0.144985	1841.09
24	Control (embryo water)		Treatment	0.159772	1729.15
25	0.0016% DMSO (vehicle)		Baseline	1.23444	1236.83
26	0.0016% DMSO (vehicle)		Baseline	1.20586	1101.88
27	0.0016% DMSO (vehicle)		Baseline	0.204193	1765.59
30	0.0016% DMSO (vehicle)		Baseline	0.460752	1854.97
31	0.0016% DMSO (vehicle)		Baseline	0.457822	1076.88
33	0.0016% DMSO (vehicle)		Baseline	0.29461	1417.78
25	0.0016% DMSO (vehicle)		Treatment	0.0364629	2134.51
26	0.0016% DMSO (vehicle)		Treatment	1.31261	1092.71
27	0.0016% DMSO (vehicle)		Treatment	0.992842	1520.86
30	0.0016% DMSO (vehicle)		Treatment	0.107345	2122.12
31	0.0016% DMSO (vehicle)		Treatment	1.3347	1073.66
33	0.0016% DMSO (vehicle)		Treatment	0.652771	1310.73
36	0.05% Formalin		Baseline	0.172244	1986.56
37	0.05% Formalin		Baseline	0.791123	1084.45
38	0.05% Formalin		Baseline	0.75666	1637.08
39	0.05% Formalin		Baseline	0.697305	1678.42
41	0.05% Formalin		Baseline	0.447925	1471.2
42	0.05% Formalin		Baseline	0.633593	1633.8
43	0.05% Formalin		Baseline	0.818053	1021.34
44	0.05% Formalin		Baseline	1.00085	1286.95
45	0.05% Formalin		Baseline	0.22348	1969.7
46	0.05% Formalin		Baseline	0.533771	1540.85
47	0.05% Formalin		Baseline	0.335053	1614.21
48	0.05% Formalin		Baseline	0.370629	1747.71
49	0.05% Formalin		Baseline	0.106496	2213.82
50	0.05% Formalin		Baseline	0.492216	1711.7
51	0.05% Formalin		Baseline	0.154629	1737
52	0.05% Formalin		Baseline	0.677823	1338.95
36	0.05% Formalin		Treatment	2.82001	999.951
37	0.05% Formalin		Treatment	1.66805	1067.3
38	0.05% Formalin		Treatment	1.87236	1088.24
39	0.05% Formalin		Treatment	1.74539	1133.46
41	0.05% Formalin		Treatment	2.43979	1268.52
42	0.05% Formalin		Treatment	1.26228	1169.79
43	0.05% Formalin		Treatment	1.57134	1343.15
44	0.05% Formalin		Treatment	2.95477	1045.88
45	0.05% Formalin		Treatment	1.97888	1244.15
46	0.05% Formalin		Treatment	2.30724	1251.99
47	0.05% Formalin		Treatment	3.03621	1055.44
48	0.05% Formalin		Treatment	1.4225	1347.52
49	0.05% Formalin		Treatment	1.35725	1333.9
50	0.05% Formalin		Treatment	1.10618	1017.93
51	0.05% Formalin		Treatment	0.104405	2101.11
52	0.05% Formalin		Treatment	2.19594	1005.76
54	0.05% Formalin + 3uM Fentanyl		Baseline	1.00691	1317.33
55	0.05% Formalin + 3uM Fentanyl		Baseline	1.05042	1193.57
56	0.05% Formalin + 3uM Fentanyl		Baseline	0.75307	1710.01
57	0.05% Formalin + 3uM Fentanyl		Baseline	0.216415	1663.16
58	0.05% Formalin + 3uM Fentanyl		Baseline	0.569632	1745.71
60	0.05% Formalin + 3uM Fentanyl		Baseline	0.442264	1448.68
61	0.05% Formalin + 3uM Fentanyl		Baseline	0.202908	2192.8
62	0.05% Formalin + 3uM Fentanyl		Baseline	1.17056	990.831
54	0.05% Formalin + 3uM Fentanyl		Treatment	2.03807	1219.78
55	0.05% Formalin + 3uM Fentanyl		Treatment	2.41773	815.982
56	0.05% Formalin + 3uM Fentanyl		Treatment	0.196222	2115.59
57	0.05% Formalin + 3uM Fentanyl		Treatment	0.0487013	2443.5
58	0.05% Formalin + 3uM Fentanyl		Treatment	1.06298	1286.34
60	0.05% Formalin + 3uM Fentanyl		Treatment	0.16037	2091.68
61	0.05% Formalin + 3uM Fentanyl		Treatment	0.0613985	2394.21
62	0.05% Formalin + 3uM Fentanyl		Treatment	0.835308	1076.82
63	0.05% Formalin + 3uM Fentanyl +20uM BIMU8		Baseline	1.0963	1331.48
64	0.05% Formalin + 3uM Fentanyl +20uM BIMU8		Baseline	0.273442	1628.92
65	0.05% Formalin + 3uM Fentanyl +20uM BIMU8		Baseline	0.310073	1762.01
66	0.05% Formalin + 3uM Fentanyl +20uM BIMU8		Baseline	0.163494	1608.42
67	0.05% Formalin + 3uM Fentanyl +20uM BIMU8		Baseline	0.654125	1205.44
68	0.05% Formalin + 3uM Fentanyl +20uM BIMU8		Baseline	0.63691	1547.35
69	0.05% Formalin + 3uM Fentanyl +20uM BIMU8		Baseline	0.270625	1647.74
70	0.05% Formalin + 3uM Fentanyl +20uM BIMU8		Baseline	0.120351	2025.75
71	0.05% Formalin + 3uM Fentanyl +20uM BIMU8		Baseline	0.410272	1538
72	0.05% Formalin + 3uM Fentanyl +20uM BIMU8		Baseline	0.203148	1866.48
73	0.05% Formalin + 3uM Fentanyl +20uM BIMU8		Baseline	0.573195	1583.02
74	0.05% Formalin + 3uM Fentanyl +20uM BIMU8		Baseline	0.47139	1525.15
75	0.05% Formalin + 3uM Fentanyl +20uM BIMU8		Baseline	0.462157	1611.25
76	0.05% Formalin + 3uM Fentanyl +20uM BIMU8		Baseline	0.734361	1359.25
77	0.05% Formalin + 3uM Fentanyl +20uM BIMU8		Baseline	1.44229	983.151
78	0.05% Formalin + 3uM Fentanyl +20uM BIMU8		Baseline	0.559424	1923.21
79	0.05% Formalin + 3uM Fentanyl +20uM BIMU8		Baseline	1.05347	1139.43
63	0.05% Formalin + 3uM Fentanyl +20uM BIMU8		Treatment	2.80687	828.436
64	0.05% Formalin + 3uM Fentanyl +20uM BIMU8		Treatment	1.99083	1355.45
65	0.05% Formalin + 3uM Fentanyl +20uM BIMU8		Treatment	0.996983	1432.15
66	0.05% Formalin + 3uM Fentanyl +20uM BIMU8		Treatment	1.55039	987.447
67	0.05% Formalin + 3uM Fentanyl +20uM BIMU8		Treatment	1.75903	1262.91
68	0.05% Formalin + 3uM Fentanyl +20uM BIMU8		Treatment	1.92455	1082.36
69	0.05% Formalin + 3uM Fentanyl +20uM BIMU8		Treatment	1.80488	1021.53
70	0.05% Formalin + 3uM Fentanyl +20uM BIMU8		Treatment	0.0701324	1803.68
71	0.05% Formalin + 3uM Fentanyl +20uM BIMU8		Treatment	0.0878025	2240.71
72	0.05% Formalin + 3uM Fentanyl +20uM BIMU8		Treatment	0.213683	1993.57
73	0.05% Formalin + 3uM Fentanyl +20uM BIMU8		Treatment	0.0927881	2098.1
74	0.05% Formalin + 3uM Fentanyl +20uM BIMU8		Treatment	0.194581	2163.01
75	0.05% Formalin + 3uM Fentanyl +20uM BIMU8		Treatment	1.17227	1197.26
76	0.05% Formalin + 3uM Fentanyl +20uM BIMU8		Treatment	0.118744	2063.63
77	0.05% Formalin + 3uM Fentanyl +20uM BIMU8		Treatment	1.80812	1298.91
78	0.05% Formalin + 3uM Fentanyl +20uM BIMU8		Treatment	0.0898654	2399.24
79	0.05% Formalin + 3uM Fentanyl +20uM BIMU8		Treatment	0.209743	1828.62
80	0.05% Formalin + 3uM Fentanyl +5uM CX614		Baseline	1.17114	1434.7
84	0.05% Formalin + 3uM Fentanyl +5uM CX614		Baseline	0.652528	1490.03
85	0.05% Formalin + 3uM Fentanyl +5uM CX614		Baseline	0.184335	1540.63
86	0.05% Formalin + 3uM Fentanyl +5uM CX614		Baseline	0.107226	1970.91
87	0.05% Formalin + 3uM Fentanyl +5uM CX614		Baseline	0.126763	1975.21
88	0.05% Formalin + 3uM Fentanyl +5uM CX614		Baseline	0.226044	1859.32
89	0.05% Formalin + 3uM Fentanyl +5uM CX614		Baseline	0.858225	1209.9
91	0.05% Formalin + 3uM Fentanyl +5uM CX614		Baseline	0.628297	1511.63
92	0.05% Formalin + 3uM Fentanyl +5uM CX614		Baseline	0.783128	1458.49
93	0.05% Formalin + 3uM Fentanyl +5uM CX614		Baseline	0.10683	1439.09
94	0.05% Formalin + 3uM Fentanyl +5uM CX614		Baseline	1.45332	1504.88
95	0.05% Formalin + 3uM Fentanyl +5uM CX614		Baseline	0.74575	1665.03
96	0.05% Formalin + 3uM Fentanyl +5uM CX614		Baseline	1.68189	1426.65
80	0.05% Formalin + 3uM Fentanyl +5uM CX614		Treatment	2.87496	1247.43
84	0.05% Formalin + 3uM Fentanyl +5uM CX614		Treatment	3.13683	1440.06
85	0.05% Formalin + 3uM Fentanyl +5uM CX614		Treatment	2.24944	1486.16
86	0.05% Formalin + 3uM Fentanyl +5uM CX614		Treatment	0.994538	1668.66
87	0.05% Formalin + 3uM Fentanyl +5uM CX614		Treatment	2.95377	1311.34
88	0.05% Formalin + 3uM Fentanyl +5uM CX614		Treatment	0.419	1842.38
89	0.05% Formalin + 3uM Fentanyl +5uM CX614		Treatment	3.02282	1386.03
91	0.05% Formalin + 3uM Fentanyl +5uM CX614		Treatment	1.9964	1706.87
92	0.05% Formalin + 3uM Fentanyl +5uM CX614		Treatment	2.50578	1496.51
93	0.05% Formalin + 3uM Fentanyl +5uM CX614		Treatment	2.35566	1471.4
94	0.05% Formalin + 3uM Fentanyl +5uM CX614		Treatment	3.85556	1340.66
95	0.05% Formalin + 3uM Fentanyl +5uM CX614		Treatment	1.75073	1726.8
96	0.05% Formalin + 3uM Fentanyl +5uM CX614		Treatment	3.2667	1396.01

## Sheet: Figure7C
Animal #	Group		Condition	Swimming velocity	Angular velocity
1	Control (embryo water)		Baseline	0.411949	1609.72
2	Control (embryo water)		Baseline	1.37447	1502.63
3	Control (embryo water)		Baseline	0.774741	1699.28
4	Control (embryo water)		Baseline	1.43449	1384.39
1	Control (embryo water)		Treatment	0.258662	1811.75
2	Control (embryo water)		Treatment	0.28674	1348.1
3	Control (embryo water)		Treatment	1.33692	1555.49
4	Control (embryo water)		Treatment	0.959327	1175.49
5	0.05% Formalin		Baseline	0.621409	1675.36
6	0.05% Formalin		Baseline	0.803554	1778.63
8	0.05% Formalin		Baseline	0.645333	1648.34
9	0.05% Formalin		Baseline	0.239126	1446.75
10	0.05% Formalin		Baseline	0.972716	1496.61
11	0.05% Formalin		Baseline	1.01282	1085.96
12	0.05% Formalin		Baseline	0.166729	1538.8
13	0.05% Formalin		Baseline	0.925126	812.364
14	0.05% Formalin		Baseline	0.355757	1707.05
5	0.05% Formalin		Treatment	0.88701	1572.43
6	0.05% Formalin		Treatment	1.3581	1819.22
8	0.05% Formalin		Treatment	1.60555	1539.91
9	0.05% Formalin		Treatment	1.24448	1468.27
10	0.05% Formalin		Treatment	2.33887	1177.16
11	0.05% Formalin		Treatment	1.82253	1251.52
12	0.05% Formalin		Treatment	0.470257	1661.52
13	0.05% Formalin		Treatment	2.51205	1132.82
14	0.05% Formalin		Treatment	1.79169	1513.06
15	3uM Fentanyl + 0.05% Formalin		Baseline	0.141272	2092.72
16	3uM Fentanyl + 0.05% Formalin		Baseline	0.859535	1543.15
17	3uM Fentanyl + 0.05% Formalin		Baseline	1.11272	1247.43
20	3uM Fentanyl + 0.05% Formalin		Baseline	1.12115	1404.35
21	3uM Fentanyl + 0.05% Formalin		Baseline	1.21925	1122.87
22	3uM Fentanyl + 0.05% Formalin		Baseline	1.10722	1140.91
23	3uM Fentanyl + 0.05% Formalin		Baseline	0.207595	2104.6
24	3uM Fentanyl + 0.05% Formalin		Baseline	1.14745	1578
15	3uM Fentanyl + 0.05% Formalin		Treatment	0.0257693	2508.13
16	3uM Fentanyl + 0.05% Formalin		Treatment	1.02097	1465.42
17	3uM Fentanyl + 0.05% Formalin		Treatment	1.96753	1194.7
20	3uM Fentanyl + 0.05% Formalin		Treatment	2.46279	1055.39
21	3uM Fentanyl + 0.05% Formalin		Treatment	1.46612	1225.9
22	3uM Fentanyl + 0.05% Formalin		Treatment	0.985193	1267.04
23	3uM Fentanyl + 0.05% Formalin		Treatment	2.10213	1175.35
24	3uM Fentanyl + 0.05% Formalin		Treatment	2.33778	1354.03
